# Supplementary material for: Validity and Effects of Placement of Velocity-Based Training Devices
Source: MDPI journal article supplement (doi:10.3390/sports9090123), 2021-08-31
Supplement: s1 [file s1]

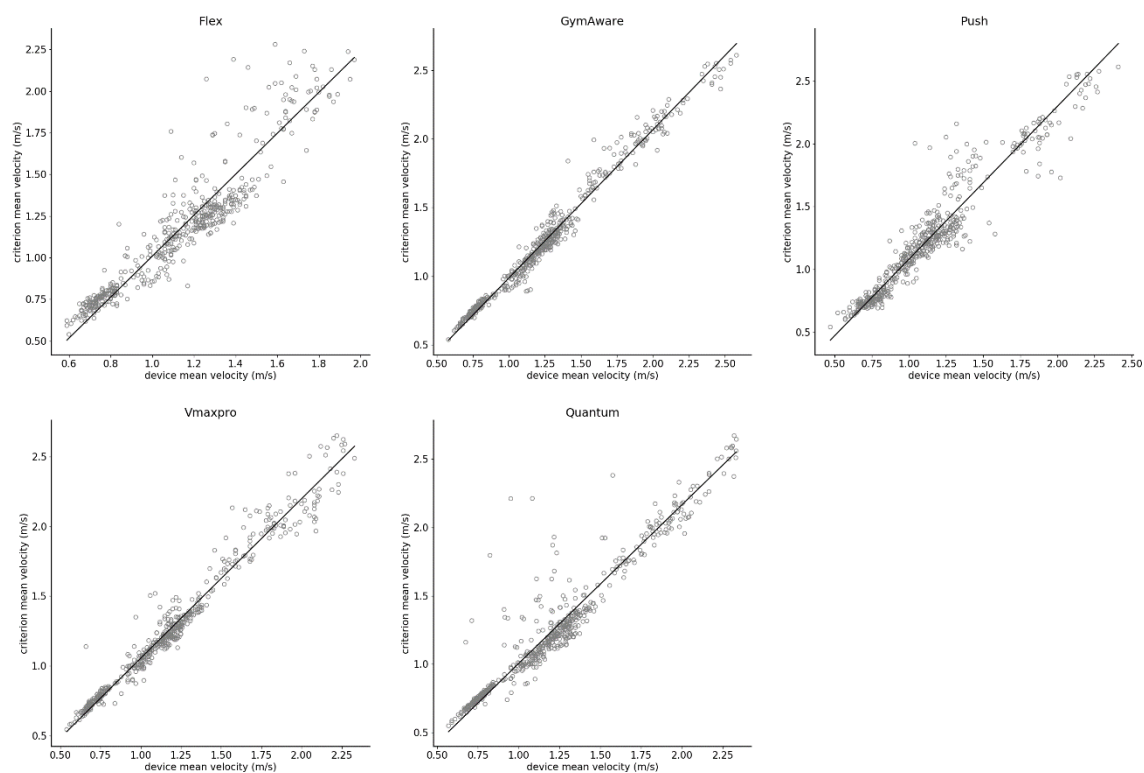

**Figure S3.** Data point scatter and least-products regression lines for the individual devices (panels) and all exercises pooled together, including power snatch, for the parameter  $v_{\text{mean}}$ .
