# Supplementary material for: Validity and Effects of Placement of Velocity-Based Training Devices
Source: MDPI journal article supplement (doi:10.3390/sports9090123), 2021-08-31
Supplement: s1 [file s1]

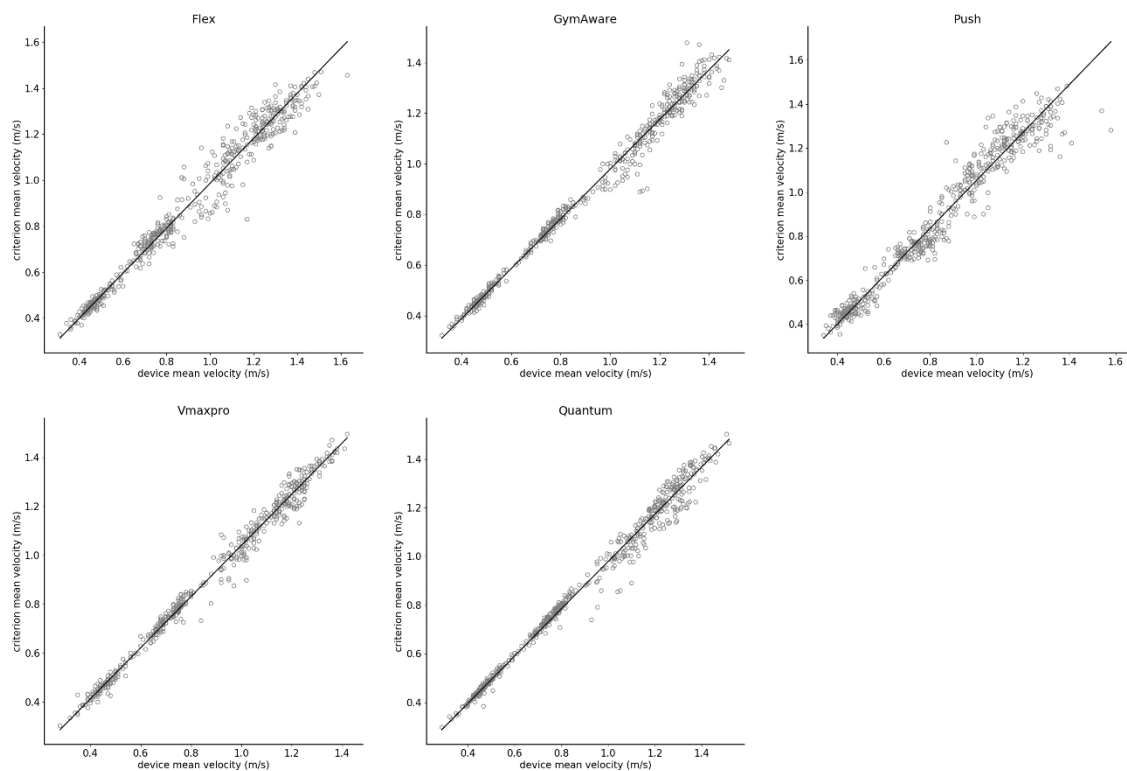

**Figure S4.** Data point scatter and least-products regression lines for the individual devices (panels) and all exercises pooled together, excluding power snatch, for the parameter  $v_{\text{mean}}$ . Regressions were generated without power snatch because there appeared to be a systematic difference in  $v_{\text{mean}}$  between devices and criterion measures.
