# Supplementary material for: Validity and Effects of Placement of Velocity-Based Training Devices
Source: Sports (Basel). 2021 Aug 31;9(9):123. doi: 10.3390/sports9090123 (PMC8472848; doi:10.3390/sports9090123)
Supplement: Supplementary file 1 [file sports-09-00123-s001.zip]

Archive with 12 entries (12 files):
- sports-1225326-supplementary/Figure S1.pdf
- sports-1225326-supplementary/Figure S1.png
- sports-1225326-supplementary/Figure S2.pdf
- sports-1225326-supplementary/Figure S2.png
- sports-1225326-supplementary/Figure S3.pdf
- sports-1225326-supplementary/Figure S3.png
- sports-1225326-supplementary/Figure S4.pdf
- sports-1225326-supplementary/Figure S4.png
- sports-1225326-supplementary/Figure S5.pdf
- sports-1225326-supplementary/Figure S5.png
- sports-1225326-supplementary/Supplementary S1.pdf
- sports-1225326-supplementary/Supplementary S2.xlsx
