# Supplementary material for: Validity and Effects of Placement of Velocity-Based Training Devices
Source: Sports (Basel). 2021 Aug 31;9(9):123. doi: 10.3390/sports9090123 (PMC8472848; doi:10.3390/sports9090123)
Supplement: Supplementary file 1 [file sports-09-00123-s001.zip › sports-1225326-supplementary/Supplementary S2.xlsx]

## Sheet: data
heavy squat	mean_gymaware	vmean_GymAware	peak_gymaware	vpeak_GymAware		mean_Flex	vmean_Flex	peak_Flex	vpeak_Flex		mean_push	vmean_PUSH	peak_push	vpeak_PUSH		mean_1Quantum	vmean_1Quantum	peak_1Quantum	vpeak_1Quantum		mean_2Quantum	vmean_2Quantum	peak_2Quantum	vpeak_2Quantum		mean_vmaxpro	vmean_VmaxPro	peak_vmaxpro	vpeak_VmaxPro		vmean_MidBar_real	vpeak_MidBar_real
Exercise	GymAware					Flex					Push					Quantum 1					Quantum 2					Vmaxpro					Bar Mid-Point
	vmean		vpeak			vmean		vpeak			vmean		vpeak			vmean		vpeak			vmean		vpeak			vmean		vpeak			vmean	vpeak
	device	criterion	device	criterion		device	criterion	device	criterion		device	criterion	device	criterion		device	criterion	device	criterion		device	criterion	device	criterion		device	criterion	device	criterion
heavy squat	0.53	0.529973	1	1.07126		0.58	0.537539	1.18	1.09414		0.46	0.528932	0.96	1.06807		0.488942	0.489053	0.925532	0.985355		0.528271	0.533153	1.00824	1.08099		0.47	0.492925	0.92	0.998413		0.471062	0.931154
heavy squat	0.41	0.39907	0.98	1.08018		0.42	0.400557	1.01	1.09745		0.41	0.398508	0.86	1.0778		0.391474	0.386255	0.935066	1.01733		0.417194	0.400791	0.989751	1.08751		0.38	0.388468	0.93	1.02684		0.372403	0.904361
heavy squat	0.47	0.452061	1.08	1.22331		0.5	0.462139	1.25	1.24936		0.44	0.450669	1	1.21965		0.439128	0.427584	1.00492	1.12286		0.466676	0.456312	1.10312	1.23435		0.41	0.429776	1	1.13824		0.417277	1.00016
heavy squat	0.43	0.409309	1.14	1.3082		0.44	0.417659	1.23	1.34199		0.4	0.40779	0.86	1.30351		0.392236	0.380472	1.03115	1.17757		0.42187	0.413944	1.16773	1.32252		0.37	0.384145	1.02	1.19752		0.375847	1.01667
heavy squat	0.38	0.373142	1.06	1.22167		0.39	0.378957	1.19	1.23643			0.372038	1.02	1.21959		0.359909	0.351747	1.01467	1.16547		0.378304	0.374293	1.06962	1.22791		0.34	0.355636	0.98	1.17394		0.335647	0.968748
heavy squat	0.58	0.581422	1.03	1.13046		0.58	0.577957	1.15	1.11281		0.6	0.58191	1	1.13287		0.599049	0.602316	1.10441	1.19851		0.574241	0.579878	1.04278	1.12296		0.56	0.59981	1.06	1.18809		0.540277	1.02435
heavy squat	0.48	0.479892	1	1.09495			0.292783	1.38	1.0939		0.49	0.480679	0.91	1.09513		0.506781	0.511043	1.00544	1.09934		0.468737	0.473915	1.00526	1.09453		0.47	0.507177	0.96	1.09857		0.45417	0.950271
heavy squat	0.45	0.44536	0.95	1.02184		0.44	0.447212	1.02	1.0252		0.46	0.445113	0.84	1.02129		0.443106	0.446995	0.92931	1.00965		0.443037	0.446128	0.947975	1.02321		0.42	0.447776	0.89	1.01146		0.415884	0.892717
heavy squat	0.55	0.538975	1.01	1.10778		0.55	0.53682	1.21	1.11493		0.54	0.539287	0.96	1.10683		0.537877	0.542524	0.988088	1.08027		0.534347	0.538046	1.02141	1.11084		0.52	0.540981	0.96	1.0843		0.495286	0.948619
heavy squat	0.53	0.521874	1.02	1.10896		0.56	0.520842	1.17	1.10649		0.51	0.522025	0.9	1.10932		0.52247	0.51733	1.02523	1.11891		0.525203	0.521419	1.01997	1.10789		0.5	0.521182	0.98	1.11724		0.487756	0.968324
heavy squat	0.48	0.464446	0.87	0.905556		0.47	0.464685	0.85	0.907181		0.4	0.464423	0.74	0.906143		0.47	0.437245	0.86	0.902924		0.47	0.464521	0.86	0.906388							0.408346	0.831631
heavy squat	0.49	0.474289	1.02	1.12906		0.47	0.473539	0.95	1.12871		0.44	0.473745	0.92	1.12951		0.48	0.473806	1.03	1.13179		0.48	0.475968	1.03	1.12856							0.432948	0.950541
heavy squat	0.53	0.523908	1.02	1.11476		0.52	0.522062	1.02	1.11818		0.48	0.523346	0.93	1.1144		0.53	0.526164	1.01	1.10262		0.53	0.525639	1.03	1.116							0.466061	0.952082
heavy squat	0.46	0.435176	0.94	1.02709		0.42	0.429557	0.96	1.02321		0.38	0.43909	0.8	1.02707		0.46	0.454249	0.96	1.04154		0.45	0.436289	0.95	1.02565		0.44	0.455105	0.94	1.03911		0.409333	0.900824
heavy squat			0.99	1.09055		0.47		0.93	1.09071				0.88	1.09073				0.99	1.09242				1	1.09066					1.09162			0.923044
heavy squat	0.45	0.440656	0.92	0.963481		0.43	0.451051	0.89	0.97977		0.45	0.438751	0.86	0.961178		0.404736	0.409101	0.841887	0.900875		0.443185	0.442875	0.908243	0.970339							0.408671	0.865823
heavy squat	0.44	0.430745	0.81	0.852598							0.43	0.434854	0.79	0.857545		0.525138	0.539078	0.935829	0.991087							0.5	0.520987	0.94	0.969579		0.462	0.867825
heavy squat	0.36	0.350003	0.92	1.00939		0.36	0.352014	0.91	1.01891		0.34	0.34974	0.86	1.00823		0.352165	0.346505	0.895158	0.974063		0.356353	0.35083	0.925448	1.01343		0.35	0.347201	0.9	0.979627		0.335035	0.871097
heavy squat	0.55	0.524861	0.97	1.03684		0.5	0.525633	0.87	1.03703		0.53	0.525744	0.97	1.03674		0.538361	0.530132	0.965997	1.03655		0.524126	0.522183	0.957966	1.03689							0.499577	0.9454
heavy squat	0.48	0.474294	0.89	0.932452		0.48	0.481142	0.84	0.934294		0.48	0.473344	0.89	0.932156		0.451441	0.448451	0.877862	0.925042		0.476535	0.477191	0.8811	0.933204							0.447921	0.878354
heavy squat	0.52	0.50565	0.89	0.952504		0.51	0.495688	0.91	0.943484		0.49	0.501262	0.89	0.95389		0.522805	0.512671	0.929717	0.991575		0.502177	0.498469	0.879379	0.948539			0.513155		0.985625		0.480237	0.88412
heavy squat	0.51	0.474561	0.98	1.0513		0.49	0.478818	1.02	1.06977		0.47	0.473972	0.95	1.0488		0.466392	0.454771	0.909324	0.98097		0.490076	0.476231	0.975706	1.0592			0.456856		0.991806		0.443461	0.902338
heavy squat	0.45	0.440337	0.94	1.01903		0.44	0.435729	1	1.02491		0.42	0.44101	0.89	1.01821		0.440687	0.440509	0.92003	1.00097		0.435714	0.438313	0.928051	1.02157			0.437484		1.00359		0.41795	0.892825
heavy squat	0.46	0.437606	0.87	0.921584		0.43	0.429497	0.85	0.916308		0.44	0.435068	0.87	0.922404		0.469253	0.464891	0.896796	0.943962		0.438213	0.43234	0.863032	0.91936			0.461687		0.940003		0.429044	0.867235
heavy squat	0.4	0.389223	0.93	1.00408		0.38	0.379353	0.92	1.00215		0.38	0.390617	0.88	1.00438		0.424252	0.424834	0.939922	1.01451		0.386646	0.385018	0.915614	1.00303		0.41	0.418672	0.95	1.01309		0.38849	0.918378
heavy squat	0.5	0.474452	1.07	1.15545							0.45	0.474257	0.98	1.15534		0.488782	0.474369	1.06676	1.1513		0.484294	0.471044	1.06252	1.15607		0.47	0.475091	1.06	1.1516		0.448024	1.02344
heavy squat			1.07	1.19044									0.98	1.18863			0.37364	1.04716	1.13958			0.375177	1.0801	1.19594				1.06	1.1473		0.362872	1.03173
heavy squat	0.49	0.469204	1.09	1.20252							0.44	0.467185	0.96	1.19849		0.428847	0.401464	0.992394	1.09164		0.477005	0.475397	1.09114	1.21485							0.420199	1.0222
heavy squat	0.45	0.411802	1.06	1.17484							0.46	0.413152	0.97	1.17397		0.466408	0.383395	1.06365	1.15709		0.426621	0.411802	1.06092	1.17726		0.47	0.433434	1.04	1.1592		0.39238	1.04022
heavy squat			1.06	1.14618									1.01	1.14423			0.403828	1.00972	1.09686			0.403723	1.0515	1.15229							0.374823	1.00574
heavy squat	0.51	0.504444	1.16	1.30779		0.51	0.497576	1.15	1.30775		0.56	0.505446	1.15	1.30789		0.534539	0.506274	1.19242	1.30999		0.511848	0.501465	1.1714	1.30775		0.5	0.506915	1.17	1.3095		0.469723	1.1557
heavy squat	0.48	0.448331	1.13	1.23963		0.47	0.454291	1.2	1.25549		0.53	0.448166	1.18	1.23748		0.455812	0.435044	1.06725	1.17947		0.475335	0.44884	1.12769	1.24636							0.434107	1.05943
heavy squat		0.435329	1.07	1.17698			0.431067	1.01	1.18254			0.435933	1.08	1.17615			0.452792	1.05504	1.15543			0.433506	1.06923	1.17937							0.436481	1.07981
heavy squat	0.46	0.418847	1.11	1.23131		0.44	0.417074	1.11	1.23871		0.45	0.419095	1.05	1.23027		0.442521	0.425796	1.0845	1.20253		0.443041	0.418095	1.1083	1.23445		0.42	0.42472	1.09	1.20689		0.409096	1.05731
heavy squat	0.47	0.440761	1.02	1.10136			0.4418	1.04	1.10048		0.44	0.437423	0.93	1.10151			0.38017	1.01823	1.10486		0.450547	0.441828	1.00972	1.10097		0.39	0.37564	1.04	1.1044		0.432957	0.989343
heavy squat	0.57	0.566039	1.09	1.27525		0.59	0.562484	1.04	1.27383		0.58	0.56574	1.12	1.27546		0.560468	0.558225	1.12699	1.28124		0.568734	0.561266	1.11804	1.2747		0.54	0.559363	1.09	1.28026		0.515545	1.0643
heavy squat	0.51	0.508688	1.05	1.23206		0.49	0.494398	1.01	1.20503		0.56	0.510078	1.08	1.23571		0.551887	0.552413	1.16654	1.33632		0.506517	0.504492	1.05551	1.2206		0.52	0.541568	1.1	1.32037		0.491216	1.05181
heavy squat	0.48	0.470877	1.05	1.21083		0.47	0.469713	0.97	1.20346		0.51	0.471063	1.04	1.21191		0.479459	0.473582	1.09216	1.23972		0.477979	0.470355	1.05776	1.20776		0.46	0.47236	1.04	1.2353		0.434791	0.995504
heavy squat	0.46	0.450685	1	1.15381		0.47	0.444028	1.06	1.13651		0.48	0.451621	0.98	1.15625		0.487981	0.477721	1.07637	1.22053		0.455482	0.447856	1.00895	1.14644		0.46	0.473549	1.02	1.21031		0.431351	0.976286
heavy squat	0.45	0.448956	1.01	1.16258		0.48	0.44028	1.14	1.14967		0.44	0.44968	0.92	1.16432		0.491184	0.482102	1.07479	1.21228		0.45219	0.443157	1.01802	1.15717		0.46	0.478701	1.02	1.20465		0.434452	0.980223
heavy squat	0.57	0.566314	1.09	1.23529		0.59	0.569273	1.16	1.23742		0.57	0.571417	1.06	1.23495		0.575866	0.57305	1.09772	1.22701		0.56748	0.567556	1.0977	1.23608		0.53	0.574617	1.05	1.22828		0.522001	1.03035
heavy squat	0.52	0.517354	1.07	1.21827		0.53	0.523604	1.03	1.21285		0.55	0.516493	1.09	1.21911		0.503885	0.494279	1.09618	1.23988		0.528587	0.519998	1.07832	1.21598		0.5	0.497689	1.04	1.23658		0.471159	1.01972
heavy squat	0.44	0.434912	0.99	1.147		0.42	0.428101	0.92	1.13289		0.5	0.439473	1.01	1.14895		0.470095	0.465777	1.06403	1.20249		0.438397	0.432019	0.99935	1.14103		0.47	0.461553	1	1.19393		0.418592	0.977223
heavy squat	0.45	0.446957	0.99	1.14275		0.44	0.441431	0.96	1.1331		0.47	0.447238	0.94	1.14404		0.463907	0.456193	1.04693	1.17992		0.452413	0.442492	1.0097	1.13862		0.45	0.454609	0.99	1.17404		0.419655	0.954228
heavy squat	0.4	0.392536	0.93	1.08957		0.38	0.39075	0.87	1.06023		0.4	0.393182	0.85	1.0937		0.425281	0.414923	1.05481	1.20312		0.398005	0.39339	0.935697	1.07712		0.39	0.411818	0.96	1.18574		0.38005	0.928454
heavy squat	0.57	0.579777	1.09	1.16659		0.57	0.588814	1.06	1.18062		0.59	0.578409	1.12	1.16474		0.53235	0.532073	1.04001	1.11434		0.580834	0.577303	1.08916	1.17244							0.529376	1.0111
heavy squat	0.51	0.510168	1.04	1.1354		0.51	0.521555	1.06	1.14637		0.52	0.508595	1.04	1.13393		0.466015	0.467336	1.00644	1.09791		0.519401	0.514974	1.0574	1.13987							0.460618	0.979196
heavy squat	0.47	0.458144	1.03	1.1431		0.45	0.466098	1.05	1.14505		0.43	0.457599	0.99	1.14293		0.452761	0.445246	1.03387	1.13689		0.46053	0.459897	1.03745	1.14391							0.424252	0.985319
heavy squat	0.49	0.471066	1.08	1.17764		0.49	0.477651	1.1	1.18156		0.45	0.470152	1.02	1.17698		0.449891	0.437598	1.0606	1.16151		0.487266	0.473848	1.07915	1.17924							0.427293	1.0029
heavy squat	0.49	0.472239	1.06	1.15035		0.5	0.487479	1.04	1.1672		0.43	0.470111	0.97	1.14796		0.427599	0.421612	0.995743	1.08456		0.487179	0.478686	1.06931	1.15747							0.420813	0.974828
heavy squat	0.36	0.366243	0.64	0.646191		0.34	0.377697	0.63	0.689613		0.37	0.363427	0.62	0.640279		0.321301	0.34124	0.52881	0.57479		0.355632	0.371284	0.648137	0.664157							0.340018	0.57879
heavy squat	0.62	0.600771	1.03	1.13999		0.62	0.606231	1.11	1.15081		0.62	0.600028	1.08	1.13844		0.587017	0.573285	1.00562	1.09856		0.608825	0.603057	1.04422	1.14457							0.554902	0.995183
heavy squat	0.46	0.458757	0.73	0.778468		0.49	0.478524	0.95	0.818295		0.46	0.455581	0.68	0.772922		0.375019	0.381456	0.58941	0.626701		0.459344	0.465189	0.757532	0.795379							0.405006	0.653061
heavy squat	0.51	0.507836	0.99	1.09428		0.51	0.500059	1	1.07082		0.53	0.503646	1.01	1.09754		0.541157	0.522607	1.09074	1.18542		0.506267	0.504519	0.984376	1.08436							0.482781	0.974866
heavy squat	0.54	0.525702	1	1.12808		0.52	0.5242	0.95	1.11161		0.52	0.527914	1.03	1.13037		0.546739	0.542182	1.07833	1.19637		0.536066	0.526066	1.00812	1.12103							0.489064	1.00472
heavy squat	0.51	0.527063	1.08	1.23814		0.54	0.536673	1.16	1.25698		0.57	0.525733	1.1	1.23555		0.490344	0.48732	1.02832	1.16608		0.529377	0.531122	1.10159	1.24613		0.47	0.492595	1	1.17712		0.471125	1.0284
heavy squat	0.54	0.541288	1.09	1.24236		0.55	0.541082	1.15	1.24841		0.55	0.540572	1.07	1.24153		0.523644	0.521907	1.08757	1.21939		0.546051	0.543468	1.10777	1.24489		0.51	0.524791	1.04	1.22288		0.500062	1.02678
heavy squat	0.48	0.461941	1.09	1.21234		0.47	0.471414	1.07	1.22368		0.53	0.457445	1.12	1.21081		0.435893	0.430195	1.05254	1.17094		0.477669	0.464318	1.09491	1.21707		0.43	0.433163	1.03	1.17726		0.418935	1.01609
heavy squat	0.45	0.447514	1.04	1.17067		0.45	0.452342	1	1.1704		0.48	0.447356	1.02	1.1707		0.433243	0.437432	1.04759	1.17239		0.451372	0.451599	1.05125	1.1705		0.42	0.437739	1	1.17208		0.412001	0.992976
heavy squat	0.41	0.40554	1.06	1.21857		0.41	0.405845	1.09	1.23222		0.4	0.40552	1.05	1.21653		0.410187	0.406685	1.06657	1.18027		0.412607	0.405634	1.08153	1.22454		0.39	0.406287	1.05	1.17749		0.388133	1.00909
heavy squat	0.51	0.491353	1.23	1.45231		0.47	0.485866	1.11	1.47719		0.51	0.492146	1.19	1.44878		0.506502	0.448522	1.20062	1.36873		0.498147	0.489009	1.26248	1.46282		0.5	0.499168	1.14	1.3807		0.434819	1.14566
heavy squat	0.49	0.459905	1.21	1.42974		0.48	0.464383	1.26	1.45561		0.45	0.460426	1.05	1.42609		0.47476	0.465183	1.17256	1.34051		0.477556	0.462379	1.24458	1.44072		0.45	0.466213	1.11	1.3539		0.422371	1.12181
heavy squat	0.47	0.428345	1.17	1.38515		0.45	0.427972	1.16	1.40324		0.44	0.428904	0.94	1.38266		0.448047	0.424586	1.14903	1.31664		0.457948	0.426681	1.20325	1.3928		0.48	0.425227	1.05	1.32613		0.386478	1.08996
heavy squat	0.48	0.473245	1.15	1.36892		0.46	0.468855	1.23	1.38338		0.48	0.473863	1.07	1.36692		0.494695	0.49092	1.14225	1.31293		0.472975	0.471376	1.18225	1.37503		0.47	0.488158	1.07	1.32148		0.438538	1.10406
heavy squat	0.5	0.49192	1.19	1.41384		0.5	0.496669	1.32	1.45203		0.47	0.490901	1.08	1.40856		0.479617	0.474674	1.09612	1.26791		0.499198	0.49218	1.24427	1.43004		0.49	0.477856	0.99	1.28986		0.450809	1.08333
heavy squat	0.5	0.483382	1.28	1.53005		0.48	0.485529	1.28	1.56283		0.57	0.483105	1.26	1.52558		0.489335	0.47631	1.21131	1.40382		0.503239	0.484261	1.33013	1.54373		0.48	0.477205	1.15	1.42277		0.435594	1.19518
heavy squat	0.52	0.511405	1.22	1.43453		0.56	0.511824	1.28	1.464		0.47	0.511369	1.14	1.43043		0.504613	0.498037	1.14521	1.3248		0.524251	0.511558	1.25285	1.44706		0.51	0.502268	1.05	1.34135		0.468059	1.12673
heavy squat	0.52	0.519448	1.23	1.44618		0.53	0.521111	1.25	1.46524		0.49	0.514338	1.18	1.44345		0.506668	0.504261	1.18993	1.37205		0.527031	0.52014	1.25771	1.45419		0.48	0.504912	1.12	1.38324		0.453246	1.153
heavy squat	0.45	0.434297	1.2	1.4424		0.43	0.425314	1.22	1.45423		0.47	0.434743	1.14	1.44075		0.462517	0.455773	1.20196	1.39677		0.44548	0.42988	1.23284	1.44735		0.43	0.452468	1.12	1.40369		0.402191	1.12637
heavy squat	0.52	0.502926	1.3	1.58478		0.49	0.503903	1.35	1.616		0.56	0.507558	1.18	1.58033		0.510506	0.507967	1.24529	1.46609		0.513102	0.501418	1.34849	1.59789		0.54	0.505623	1.11	1.48255		0.46212	1.22298
heavy squat	0.52	0.496169	1.05	1.18159		0.46	0.494303	1.06	1.16806		0.47	0.497162	0.96	1.18341		0.53	0.52054	1.11	1.23539		0.506	0.49822	1.06	1.17579		0.51	0.51578	1.09	1.22696		0.474771	1.01708
heavy squat	0.51	0.501754	1.06	1.21997		0.51	0.486931	0.97	1.20293		0.5	0.50246	1.03	1.22233		0.547	0.545503	1.14	1.28659		0.504	0.494607	1.07	1.21274							0.477343	1.0324
heavy squat	0.47	0.450687	1.11	1.26395		0.41	0.441938	0.96	1.24796		0.45	0.451931	1.02	1.26617		0.487	0.479394	1.19	1.3265		0.452	0.446944	1.12	1.25716		0.46	0.473668	1.16	1.317		0.430371	1.06426
heavy squat	0.55	0.553925	1.07	1.15773		0.55	0.541521	1.02	1.12646		0.51	0.555714	0.98	1.16214		0.617657	0.609773	1.19115	1.27884		0.551575	0.542919	1.06179	1.14452		0.58	0.60047	1.15	1.26038		0.535531	1.0474
heavy squat	0.48	0.459669	1.04	1.13034		0.44	0.451025	1.02	1.12846		0.43	0.460346	0.93	1.1306		0.502225	0.493079	1.05158	1.1385		0.463593	0.453681	1.03949	1.12951		0.47	0.489641	1.02	1.1372		0.472507	1.13379
heavy squat	0.49	0.44165	1.03	1.11821		0.48	0.433363	1.07	1.10813		0.42	0.442814	0.92	1.11961		0.498692	0.478508	1.07096	1.15757		0.46633	0.438131	1.02233	1.11397		0.48	0.473398	1.04	1.15156		0.46005	1.13558
heavy squat	0.5	0.479809	1.04	1.14649		0.47	0.48215	0.81	1.13508		0.46	0.480644	0.96	1.14813		0.501063	0.490482	1.09001	1.19083		0.487586	0.477292	1.03542	1.14165		0.49	0.491123	1.05	1.18404		0.485777	1.16619
heavy squat	0.43	0.421484	0.98	1.06234		0.42	0.420563	0.9	1.05615		0.41	0.424312	0.87	1.06324		0.454261	0.443698	1.00223	1.08754		0.418173	0.422285	0.97319	1.05971		0.43	0.43941	1	1.08371		0.428927	1.0735
heavy squat	0.55	0.519541	1.04	1.12434		0.48	0.500172	1.07	1.10086		0.46	0.521568	0.91	1.1276		0.588156	0.595543	1.12403	1.21556		0.52328	0.513458	1.03377	1.11438		0.56	0.580468	1.18	1.20162		0.55155	1.16485
heavy squat	0.48	0.459103	0.98	1.05995		0.47	0.458954	1.09	1.05807		0.4	0.455375	0.85	1.06018		0.444455	0.442963	0.978498	1.06811		0.463191	0.458974	0.980292	1.05914		0.43	0.445056	0.98	1.06676		0.453418	1.06361
heavy squat	0.49	0.472025	1.01	1.1115		0.46	0.466506	1.06	1.1104		0.43	0.472241	0.9	1.11169		0.48164	0.487059	1.01552	1.11768		0.478129	0.467297	1.02097	1.11104		0.47	0.481585	1.02	1.11669		0.476672	1.11452
heavy squat	0.49	0.495603	0.94	1.0079		0.51	0.500973	0.97	1.01411		0.44	0.494883	0.81	1.00704		0.468096	0.472325	0.920618	0.986633		0.501435	0.49784	0.945831	1.01054		0.46	0.470292	0.93	0.989813		0.481736	0.994572
heavy squat	0.4	0.380528	0.99	1.12826		0.41	0.369294	0.96	1.11069		0.36	0.38075	0.88	1.13078		0.446726	0.435171	1.06921	1.19946		0.381996	0.374786	0.997602	1.12083		0.43	0.429323	1.01	1.18867		0.410719	1.15835
heavy squat	0.48	0.474664	1.05	1.20214		0.46	0.473158	1.19	1.19596		0.47	0.474882	0.96	1.2033		0.484548	0.488317	1.09376	1.22397		0.472539	0.474018	1.07051	1.19919		0.47	0.487203	1.07	1.22016		0.442918	1.00707
heavy squat	0.51	0.520542	1.07	1.23033		0.51	0.521343	1.1	1.23637		0.53	0.520438	1.02	1.22951		0.506046	0.521686	1.06666	1.20917		0.511416	0.520876	1.09998	1.23305		0.48	0.522003	1.07	1.21174		0.47359	1.01017
heavy squat	0.46	0.469704	0.99	1.13157		0.45	0.462441	0.94	1.12994		0.48	0.47031	0.93	1.13177		0.481567	0.490606	1.01391	1.13767		0.45988	0.467884	1.0026	1.13061		0.44	0.487762	1.01	1.13662		0.439091	0.955766
heavy squat	0.45	0.463925	1.05	1.21194		0.44	0.467535	1.09	1.21654		0.39	0.463814	0.82	1.21151		0.455651	0.464519	1.05699	1.1962		0.458378	0.464275	1.07852	1.21359		0.42	0.464811	1.04	1.19828		0.42152	0.993894
heavy squat	0.42	0.427901	1	1.20433		0.4	0.427905	1.04	1.19961		0.39	0.427915	0.73			0.42288	0.429645	1.06077	1.22191		0.421528	0.427877	1.02183	1.20239		0.39	0.429171	1.03	1.21884		0.399818	0.983299
heavy squat	0.52	0.528673	1.05	1.14457		0.55	0.525183	1.29			0.46		0.92	1.14232		0.521284	0.528475	1.01449	1.09015		0.462765	0.525011	0.908173	1.15051		0.5	0.528398	1.01	1.09816		0.482862	0.990795
heavy squat	0.45	0.460626	1.03	1.17537		0.47	0.458631	1.18	1.1841		0.39	0.460905	0.83	1.17435		0.460888	0.468618	1.016	1.14221		0.454931	0.459776	1.05369	1.17892		0.44	0.467364	1.02	1.1473		0.428362	0.970953
heavy squat	0.45	0.461964	1.04	1.18489		0.49	0.458854	1.33			0.35		0.77	1.18199		0.463905	0.477795	0.988921	1.11265		0.449003	0.46063	1.06471	1.19261		0.43	0.472872	0.98	1.12364		0.430894	0.972248
heavy squat	0.43	0.441016	1.02	1.19623		0.45	0.443965	1.17	1.19693		0.43	0.440612	0.85	1.19607		0.423611	0.430315	1.0454	1.19574		0.391269	0.442255	0.915471	1.19692		0.39	0.431837	1.02	1.19548		0.396799	0.969187
heavy squat	0.38	0.385106	1.17	1.41842		0.38	0.385147	1.22	1.43196		0.4	0.384857	1.07	1.41638		0.380193	0.38268	1.17094	1.36512		0.379984	0.385904	1.22123	1.42412		0.36	0.381071	1.16	1.37348		0.357796	1.09231
heavy squat	0.55	0.552614	0.97	1.05624		0.54	0.549599	1.03	1.04843		0.55	0.55305	0.96	1.05733		0.565829	0.560648	1.01434	1.08745		0.551834	0.551323	0.982368	1.05288		0.54	0.558516	0.98	1.08257		0.511364	0.956564
heavy squat	0.47	0.457886	0.83	0.875278		0.45	0.447479	0.88	0.864955		0.46	0.458919	0.76	0.876726		0.480684	0.497547	0.861557	0.919025		0.453165	0.454803	0.83369	0.870863		0.47	0.488398	0.85	0.911959		0.45018	0.841619
heavy squat	0.55	0.548965	0.9	0.974605		0.54	0.547025	0.91	0.973996		0.53	0.549277	0.83	0.974658		0.535323	0.550776	0.913784	0.978442		0.537065	0.548076	0.910644	0.974295		0.52	0.548324	0.91	0.97751		0.497028	0.880411
heavy squat	0.51	0.513249	0.86	0.910875		0.51	0.513588	0.85	0.914686		0.48	0.513228	0.77	0.910372		0.498497	0.510627	0.852967	0.897256		0.501151	0.513355	0.871216	0.912465		0.49	0.510142	0.83	0.899247		0.478943	0.838224
heavy squat	0.46	0.460536	0.77	0.801374		0.46	0.452751	0.76	0.780936		0.43	0.458447	0.68	0.804274		0.475512	0.481659	0.84119	0.882546		0.451119	0.457226	0.756619	0.792576		0.46	0.480159	0.82	0.869991		0.434402	0.790372
heavy squat	0.49	0.47811	0.9	1.00695		0.49	0.482304	0.98	1.01051		0.45	0.478881	0.86	1.00647		0.484088	0.474859	0.910724	0.993147		0.486484	0.48054	0.922226	1.00843							0.444265	0.869789
heavy squat	0.46	0.456725	0.84	0.91151		0.51	0.454707	0.96	0.914211		0.42	0.453561	0.78	0.911186		0.469263	0.470354	0.849177	0.902836		0.459917	0.454115	0.850474	0.912665							0.423088	0.818644
heavy squat	0.45	0.449579	0.83	0.90632		0.42	0.454312	0.95	0.920708		0.42	0.44894	0.76	0.904255		0.42126	0.421936	0.794213	0.850005		0.448531	0.451551	0.852572	0.912408							0.396067	0.773581
heavy squat	0.44	0.430805	0.84	0.933102		0.44	0.423972	0.93	0.932567		0.44	0.43128	0.83	0.933322		0.448897	0.451739	0.854787	0.935688		0.435692	0.425881	0.854119	0.933017							0.401149	0.821068
heavy squat	0.38	0.393993	0.84	0.97116		0.36	0.394158	0.87	0.965703		0.35	0.393588	0.75	0.971852		0.398543	0.384493	0.880965	0.991183		0.380753	0.392441	0.856442	0.968789							0.37618	0.82613
heavy squat	0.45	0.435589	0.78	0.821673		0.44	0.437589	0.83	0.821159		0.44	0.435228	0.75	0.821701		0.437911	0.430041	0.79079	0.824613		0.441339	0.440229	0.7866	0.821436							0.403811	0.758635
heavy squat	0.47	0.461725	0.83	0.902841		0.45	0.465761	0.89	0.903818		0.43	0.461166	0.76	0.902645		0.466048	0.461321	0.84116	0.898773		0.464369	0.463436	0.842852	0.903143		0.46	0.45838	0.93	0.89941		0.419775	0.799487
heavy squat	0.49	0.471235	0.82	0.883203		0.45	0.470818	0.82	0.881425		0.46	0.471298	0.82	0.883383		0.469629	0.46824	0.842609	0.890228		0.472179	0.471051	0.835381	0.882406		0.44	0.467842	0.88	0.889014		0.433238	0.791636
heavy squat	0.46	0.451794	0.81	0.877064		0.47	0.453828	0.86	0.875504		0.39	0.452201	0.76	0.877368		0.450912	0.443314	0.834861	0.885141		0.450266	0.45064	0.823909	0.876319		0.41	0.440577	0.89	0.883799		0.401155	0.77489
heavy squat	0.46	0.446907	0.85	0.925639		0.45	0.45034	1	0.930482		0.43	0.446436	0.81	0.924967		0.43167	0.426753	0.852676	0.907959		0.454436	0.44835	0.872101	0.927527		0.35	0.428502	0.88	0.910519		0.400996	0.810061
heavy squat	0.44	0.41585	1.09	1.36341		0.42	0.413193	1.11	1.36558		0.42	0.416228	0.87	1.36304		0.426136	0.422816	1.13232	1.35433		0.422806	0.414717	1.12259	1.36426		0.43	0.421158	1.04	1.35561		0.381183	1.01442
heavy squat	0.51	0.486098	1.15	1.429		0.49	0.488097	1.11	1.42541		0.42	0.486527	0.95	1.42944		0.496827	0.489458	1.20543	1.44177		0.498748	0.484809	1.18303	1.42753		0.5	0.492065	1.09	1.43958		0.433285	1.08764
heavy squat	0.47	0.455481	1.18	1.49032		0.45	0.459139	1.17	1.49886		0.52	0.459131	1.16	1.48919		0.467971	0.455003	1.21021	1.45724		0.466203	0.457013	1.22828	1.49391		0.47	0.456857	1.13	1.46208		0.416562	1.07761
heavy squat	0.49	0.470613	1.25	1.61595		0.45	0.467013	1.32	1.61123		0.5	0.470573	1.21	1.61716		0.486015	0.474019	1.33048	1.63427		0.443863	0.466803	1.25884	1.61434		0.47	0.47401	1.2	1.63155		0.443537	1.17365
heavy squat	0.5	0.486088	1.26	1.60393		0.48	0.480016	1.25	1.61557		0.47	0.486347	1.14	1.60229		0.51006	0.49772	1.296	1.55919		0.494358	0.485301	1.31122	1.60887		0.48	0.496539	1.22	1.56608		0.453543	1.15121
heavy squat	0.49	0.47516	1.23	1.52512		0.49	0.480125	1.25	1.53226		0.48	0.474476	1.18	1.52422		0.473077	0.46035	1.251	1.49803		0.494649	0.477253	1.26226	1.5281		0.45	0.463161	1.18	1.50208		0.432174	1.14837
heavy squat	0.47	0.448127	1.23	1.53965		0.44	0.451305	1.2	1.54207		0.43	0.447691	1.06	1.53894		0.444461	0.436775	1.27187	1.52896		0.463421	0.449462	1.27141	1.54032		0.42	0.438384	1.17	1.53062		0.41204	1.14611
heavy squat	0.47	0.447016	1.24	1.56844		0.44	0.446022	1.13	1.56615		0.46	0.44667	1.02	1.56924		0.455908	0.449411	1.31449	1.57785		0.458244	0.448082	1.29028	1.56731		0.44	0.44686	1.22	1.57641		0.395955	1.1422
heavy squat	0.46	0.446469	1.24	1.55722		0.43	0.443625	1.21	1.5645		0.49	0.446893	0.97	1.55579		0.470568	0.465684	1.27096	1.52839		0.458857	0.445231	1.28043	1.56005		0.45	0.463607	1.19	1.53272		0.420979	1.15181
heavy squat	0.46	0.455125	1.27	1.6261		0.46	0.451056	1.26	1.63094		0.4	0.454736	0.91	1.62582		0.458872	0.4527	1.31703	1.60953		0.462691	0.452829	1.31652	1.62814		0.43	0.453988	1.21	1.61221		0.407709	1.16767
heavy squat	0.46	0.438677	0.75	0.779147		0.45	0.436968	0.77	0.769954		0.42	0.438923	0.69	0.780439		0.452446	0.4441	0.78705	0.815354		0.440424	0.437934	0.739708	0.775226		0.44	0.446221	0.78	0.809723		0.423203	0.758869
heavy squat	0.44	0.439719	0.7	0.728633		0.44	0.440442	0.72	0.724394		0.37	0.439111	0.62	0.729241		0.432206	0.432985	0.713369	0.746204		0.433184	0.441596	0.69156	0.726809		0.41	0.43127	0.68	0.743274		0.413508	0.690038
heavy squat	0.45	0.424279	0.71	0.731377		0.43	0.426578	0.73	0.742076		0.42	0.422999	0.67	0.729908		0.399114	0.397073	0.665932	0.690589		0.423397	0.428202	0.705384	0.735935		0.43	0.398812	0.73	0.696733		0.401711	0.677339
heavy squat	0.46	0.454197	0.74	0.746137		0.44	0.457274	0.75	0.747699		0.42	0.453294	0.68	0.746182		0.432783	0.435068	0.736323	0.762464		0.443938	0.453412	0.72531	0.746417		0.44	0.434671	0.76	0.758442		0.424157	0.726202
heavy squat	0.47	0.475929	0.78	0.813265		0.47	0.478887	0.76	0.819964		0.46	0.479613	0.75	0.812425		0.449742	0.457876	0.762342	0.794627		0.469293	0.479153	0.785201	0.815883							0.424246	0.7511
heavy squat	0.55	0.556591	0.94	1.00406		0.55	0.563191	1.03	1.00413							0.533908	0.538142	0.943761	1.00507		0.549929	0.559371	0.939865	1.00405		0.53	0.536246	0.95	1.00444		0.502765	0.895115
heavy squat	0.32	0.321597	0.54	0.545929		0.31	0.329217	0.56	0.542853							0.288474	0.297135	0.536382	0.56093		0.314248	0.324315	0.527515	0.544642		0.28	0.301604	0.54	0.558414		0.279187	0.524638
heavy squat	0.37	0.358145	0.52	0.562455		0.36	0.360528	0.51	0.559803							0.348661	0.354324	0.538615	0.572519		0.352716	0.35814	0.525945	0.561335		0.35	0.354116	0.55	0.570964		0.340072	0.512077
heavy squat	0.42	0.409039	0.68	0.722997		0.39	0.412656	0.66	0.720908							0.407746	0.403735	0.696606	0.732569		0.405236	0.409461	0.6751	0.722111		0.4	0.406692	0.68	0.731041		0.402116	0.678293
heavy squat	0.44	0.432592		0.842991			0.437175	0.88	0.831458							0.449617	0.426686	0.842129	0.894454		0.426197	0.438221	0.788282	0.837742							0.423261	0.780969
heavy squat	0.48	0.483992	0.92	0.990705		0.5	0.492174	0.9	1.0052		0.42	0.483022	0.82	0.988674		0.455893	0.451589	0.873789	0.936323		0.480365	0.485614	0.917035	0.996884		0.44	0.456894	0.86	0.944554		0.440293	0.852163
heavy squat	0.44	0.439192	0.91	1.00134		0.46	0.445207	0.93	1.0128		0.41	0.438358	0.81	0.999806		0.422059	0.416808	0.879573	0.95855		0.438937	0.441732	0.916037	1.00625		0.41	0.420097	0.84	0.964837		0.399813	0.871222
heavy squat	0.42	0.424265	0.97	1.08639		0.42	0.431405	0.95	1.09901		0.4	0.423654	0.84	1.08471		0.413496	0.408131	0.934408	1.03902		0.423188	0.428842	0.97456	1.09177		0.41	0.410464	0.9	1.0462		0.391275	0.90336
heavy squat	0.42	0.416861	1.02	1.15464		0.42	0.42396	1.04	1.1823		0.41	0.415893	0.9	1.15081		0.400047	0.393852	0.936473	1.04766		0.418937	0.419843	1.03265	1.16639		0.4	0.394917	0.93	1.06404		0.384545	0.924308
heavy squat	0.41	0.402133	1.06	1.20762		0.4	0.40705	0.99	1.22611		0.4	0.401092	0.95	1.20507		0.38952	0.38688	0.998575	1.1362		0.401627	0.4053	1.06351	1.21543		0.37	0.388487	0.94	1.14708		0.369587	0.973215
heavy squat	0.51	0.508128	0.99	1.05704		0.5	0.505618	0.96	1.07514		0.45	0.507243	0.91	1.05448		0.499359	0.492992	0.928383	0.987698		0.509024	0.506408	0.994109	1.06471		0.49	0.496652	0.94	0.9981		0.462795	0.923529
heavy squat	0.46	0.446808	1.07	1.191		0.48	0.449544	1.13	1.21803		0.41	0.446434	0.93	1.18721		0.44545	0.437122	0.984512	1.08649		0.452841	0.447952	1.07863	1.20249		0.43	0.438417	0.99	1.1024		0.41917	0.984166
heavy squat	0.35	0.355917	0.98	1.09416		0.36	0.361437	0.99	1.11869		0.41	0.354605	0.91	1.09076		0.330495	0.330219	0.889105	0.999268		0.357339	0.357915	0.994426	1.1046		0.32	0.333533	0.89	1.01374		0.32492	0.906025
heavy squat	0.5	0.486654	1.14	1.30866		0.53	0.497055	1.11	1.32367		0.53	0.485749	1.14	1.3066		0.472865	0.462316	1.10226	1.25068		0.497069	0.489427	1.15251	1.3151		0.45	0.469777	1.1	1.25956		0.444195	1.06679
heavy squat	0.45	0.442187	1.11	1.26495		0.45	0.436033	1.13	1.28527		0.39	0.44378	0.93	1.2621		0.421056	0.416175	1.04092	1.18579		0.444302	0.443651	1.11208	1.27356		0.4	0.417704	1.03	1.1978		0.393226	1.0237
moderate squat	0.73	0.737668	1.3	1.39826		0.8	0.751838	1.56	1.4236		0.66	0.735702	1.25	1.39472		0.69	0.691012	1.19	1.30063		0.74	0.743661	1.31	1.40899		0.66	0.699236	1.19	1.31536		0.665335	1.2062
moderate squat	0.58	0.536429	1	1.05108		0.6	0.53922	1.19	1.06505		0.47	0.540426	0.87	1.04915		0.57	0.548689	0.95	0.996852		0.57	0.537599	1	1.057		0.54	0.545527	0.95	1.00514		0.532816	0.962908
moderate squat	0.65	0.636049	1.16	1.24416		0.67	0.651032	1.2	1.2648		0.59	0.62796	1.12	1.24124		0.59	0.573248	1.09	1.16526		0.65	0.642391	1.17	1.25287		0.56	0.581824	1.07	1.17735		0.577111	1.1026
moderate squat	0.62	0.600932	1.2	1.33629		0.61	0.6037	1.25	1.33765		0.57	0.599799	1.11	1.33599		0.59	0.58596	1.2	1.33129		0.61	0.604382	1.21	1.33678		0.57	0.585255	1.16	1.33208		0.570029	1.16619
moderate squat	0.63	0.609768	1.25	1.37498		0.68	0.617223	1.28	1.38743		0.57	0.608732	1.17	1.37333		0.61	0.598068	1.2	1.32723		0.63	0.61292	1.26	1.38028		0.59	0.596706	1.18	1.33455		0.58151	1.15803
moderate squat	0.81	0.79675	1.29	1.37574		0.81	0.800035	1.29	1.37903		0.82	0.796307	1.27	1.37522		0.776111	0.784474	1.27828	1.36359		0.790335	0.798141	1.29401	1.37712		0.76	0.786266	1.27	1.36539		0.740176	1.25448
moderate squat	0.73	0.718682	1.23	1.32074		0.74	0.711476	1.23	1.31552		0.72	0.719704	1.18	1.32145		0.739053	0.748404	1.25249	1.34451		0.713501	0.715602	1.22763	1.31841		0.71	0.743715	1.23	1.34072		0.68589	1.19134
moderate squat	0.69	0.695497	1.13	1.20443		0.7	0.686607	1.2	1.20521		0.7	0.695564	1.09	1.20429		0.689238	0.697666	1.12906	1.20109		0.685607	0.695279	1.13631	1.20471		0.66	0.697319	1.11	1.20157		0.647724	1.09749
moderate squat	0.64	0.62557	1.06	1.11092		0.62	0.625151	1.09	1.1		0.66		1	1.11242		0.629728	0.630313	1.09176	1.15282		0.629664	0.625367	1.05422	1.10617		0.6	0.629287	1.07	1.14637		0.595457	1.03376
moderate squat	0.68	0.673603	1.13	1.20971		0.67	0.665012	1.06	1.20056		0.66	0.673682	1.05	1.21105		0.665654	0.677903	1.16007	1.24537		0.665224	0.665216	1.1273	1.20586		0.64	0.677048	1.12	1.23993		0.627455	1.09422
moderate squat	0.78	0.777594	1.38	1.54921		0.81	0.783251	1.36	1.53376		0.72	0.778538	1.24	1.55181		0.796021	0.791756	1.44821	1.61116		0.788284	0.774734	1.39128	1.54271		0.75	0.78755	1.4	1.6023		0.731541	1.34824
moderate squat	0.76	0.763063	1.39	1.54529		0.7	0.759448	1.36	1.52936		0.74	0.763562	1.37	1.5471		0.776458	0.77697	1.44877	1.60529		0.77447	0.761527	1.39809	1.53791		0.75	0.774803	1.39	1.59624		0.70864	1.3384
moderate squat	0.85	0.830622	1.5	1.67142		0.81	0.850962	1.46	1.68844		0.85	0.827804	1.49	1.66969		0.780411	0.787473	1.43534	1.60689		0.828479	0.839222	1.51958	1.67947		0.76	0.786937	1.39	1.61639		0.73137	1.37969
moderate squat	0.75	0.728351	1.4	1.54464		0.7	0.735767	1.31	1.54571		0.73	0.727317	1.35	1.5441		0.729904	0.70937	1.38667	1.53935		0.747303	0.73148	1.40349	1.54532		0.69	0.713642	1.34	1.53966		0.673925	1.32556
moderate squat	0.78	0.7478	1.43	1.59816		0.69	0.755087	1.4	1.59046		0.67	0.746796	1.26	1.59851		0.751482	0.741004	1.45242	1.62617		0.765577	0.750872	1.43538	1.59489		0.71	0.745249	1.38	1.62187		0.679777	1.34964
moderate squat	0.77	0.76987	1.49	1.60471		0.76	0.764414	1.44	1.6062		0.74	0.770633	1.4	1.60439		0.801993	0.791044	1.47349	1.59801		0.776428	0.767555	1.4572	1.60534		0.76	0.787762	1.45	1.59891		0.779238	1.60155
moderate squat	0.76	0.737359	1.54	1.66643		0.67	0.724359	1.44	1.67548		0.72	0.737906	1.42	1.66518		0.790786	0.774082	1.49968	1.63514		0.747793	0.735702	1.50435	1.67035		0.75	0.77134	1.45	1.63949		0.721706	1.48838
moderate squat	0.74	0.699858	1.44	1.54731		0.7	0.702032	1.35	1.5307		0.71	0.700846	1.36	1.5497		0.731252	0.683631	1.48091	1.61377		0.715305	0.696877	1.40729	1.54028		0.69	0.687849	1.44	1.60346		0.664575	1.44035
moderate squat	0.75	0.731361	1.39	1.4987		0.68	0.731578	1.25	1.50199		0.68	0.732711	1.29	1.49823		0.747167	0.718703	1.36337	1.48615		0.719769	0.727282	1.35376	1.50009		0.7	0.722933	1.36	1.48797		0.694392	1.35878
moderate squat	0.66	0.638738	1.38	1.50151		0.59	0.621431	1.27	1.49728		0.63	0.634169	1.33	1.5024			0.647306	1.41378	1.52541			0.628018	1.35168	1.49926			0.656184	1.38	1.5215		0.637187	1.39822
moderate squat	0.82	0.786104	1.34	1.45049		0.78	0.802384	1.17	1.46853							0.748784	0.738332	1.27097	1.38041		0.797265	0.792961	1.34389	1.45819		0.73	0.747075	1.25	1.39107		0.703277	1.23534
moderate squat	0.81	0.798483	1.36	1.50306		0.76	0.79083	1.2	1.49943		0.85	0.797943	1.38	1.5036		0.800229	0.79488	1.37567	1.51662		0.806635	0.788598	1.36045	1.50147		0.76	0.797111	1.35	1.51451		0.737382	1.301
moderate squat	0.77	0.753117	1.3	1.45258		0.74	0.749571	1.25	1.43409		0.81	0.753615	1.37	1.45519		0.780314	0.767812	1.38121	1.52448		0.765599	0.751596	1.31057	1.44479		0.73	0.76546	1.35	1.51358		0.716652	1.28187
moderate squat	0.72	0.719619	1.27	1.41439		0.68	0.712015	1.09	1.39817		0.77	0.720674	1.29	1.41662		0.759872	0.749394	1.33217	1.47697		0.728749	0.71639	1.26294	1.40747		0.72	0.74484	1.31	1.46745		0.689715	1.22771
moderate squat	0.73	0.72326	1.24	1.38531		0.67	0.721038	1.06	1.37126		0.77	0.723588	1.31	1.38715		0.740869	0.733381	1.30515	1.43972		0.720655	0.722299	1.24951	1.37935		0.69	0.731711	1.28	1.43139		0.67808	1.21083
moderate squat	0.81	0.820252	1.39	1.54089		0.81	0.820389	1.3	1.54347		0.82	0.820232	1.41	1.54049		0.81823	0.807371	1.39092	1.53182		0.825709	0.820314	1.39989	1.54185		0.76	0.819896	1.34	1.5332		0.755851	1.33262
moderate squat	0.77	0.773765	1.31	1.45939		0.76	0.767005	1.25	1.43857		0.8	0.77472	1.36	1.46229		0.810036	0.800621	1.39118	1.5401		0.775536	0.770896	1.30783	1.45049		0.73	0.796468	1.3	1.52778		0.729027	1.28646
moderate squat	0.72	0.715869	1.3	1.45145		0.71	0.71201	1.25	1.4384		0.75	0.716415	1.32	1.45323		0.740923	0.731411	1.3565	1.50135		0.724866	0.714229	1.30031	1.4459		0.69	0.729006	1.24	1.4936		0.68372	1.25685
moderate squat	0.67	0.652542	1.29	1.43427		0.65	0.650271	1.2	1.43306		0.52	0.652858	1.06	1.43448		0.680268	0.66996	1.30631	1.43894		0.666306	0.651574	1.28782	1.43379		0.65	0.668516	1.2	1.43809		0.622678	1.22468
moderate squat	0.72	0.696958	1.32	1.48691		0.69	0.700778	1.27	1.48605		0.69	0.705708	1.33	1.48715		0.70709	0.691597	1.33108	1.4897		0.716461	0.698569	1.33332	1.4866		0.68	0.693789	1.22	1.48925		0.64781	1.27122
moderate squat	0.81	0.76842	1.3	1.38105		0.77	0.780392	1.24	1.37841		0.81	0.768379	1.36	1.38141		0.773524	0.767991	1.30242	1.39204		0.775079	0.780116	1.28783	1.37984		0.75	0.767939	1.31	1.39026		0.74484	1.2659
moderate squat	0.75	0.764681	1.33	1.4518		0.75	0.767496	1.3	1.45658		0.8	0.764304	1.39	1.45108		0.727359	0.747597	1.30133	1.43578		0.75033	0.765844	1.32876	1.4538		0.71	0.748689	1.3	1.43763		0.742384	1.29754
moderate squat	0.72	0.702359	1.34	1.43323		0.7	0.718608	1.27	1.45895		0.75	0.701253	1.36	1.4297		0.674014	0.671608	1.23996	1.33465		0.711381	0.705731	1.33544	1.44408		0.65	0.676112	1.25	1.34958		0.673097	1.26415
moderate squat	0.73	0.725578	1.4	1.5248		0.73	0.728795	1.32	1.52923		0.76	0.72514	1.41	1.52415		0.716865	0.72202	1.36919	1.50902		0.712416	0.726926	1.37486	1.52664		0.69	0.723665	1.37	1.51114		0.711088	1.35755
moderate squat	0.76	0.756065	1.45	1.58268		0.75	0.763576	1.37	1.59428		0.79	0.755025	1.5	1.581		0.715006	0.719995	1.39731	1.53784		0.750651	0.759235	1.44929	1.58759		0.69	0.724146	1.39	1.54465		0.713812	1.4074
moderate squat	0.8	0.785958	1.39	1.48578		0.82	0.801126	1.46	1.50495		0.83	0.783857	1.44	1.48307		0.749978	0.761011	1.30672	1.41297		0.797578	0.792347	1.39105	1.49387		0.73	0.758395	1.34	1.42386		0.743717	1.32377
moderate squat	0.83	0.823134	1.53	1.66138		0.83	0.835771	1.38	1.67408		0.84	0.821379	1.5	1.6596		0.771573	0.784156	1.46014	1.61232		0.825696	0.828475	1.51687	1.66666		0.75	0.791341	1.49	1.61984		0.771123	1.44806
moderate squat	0.74	0.720024	1.37	1.42988		0.73	0.731907	1.35	1.45333		0.75	0.718371	1.37	1.42657		0.690446	0.683721	1.25771	1.34007		0.734673	0.72505	1.35402	1.43982		0.66	0.690534	1.31	1.35368		0.678808	1.29919
moderate squat	0.73	0.738178	1.4	1.52021		0.73	0.739778	1.35	1.52958		0.75	0.737952	1.41	1.51899		0.725827	0.73225	1.34567	1.48457		0.732344	0.738854	1.38688	1.52422		0.68	0.733118	1.38	1.48998		0.693501	1.35088
moderate squat	0.75	0.750022	1.41	1.53547		0.81	0.772679	1.5	1.56633		0.77	0.746866	1.4	1.53128		0.685346	0.687956	1.28709	1.42021		0.754514	0.759602	1.41291	1.54858		0.66	0.693426	1.34	1.4377		0.695375	1.31203
moderate squat	0.83	0.829907	1.48	1.55655		0.93	0.820036	1.79	1.55692		0.81	0.829853	1.45	1.55655		0.831628	0.839644	1.45978	1.55723		0.822398	0.830115	1.45675	1.55676		0.78	0.839578	1.47	1.55671		0.811701	1.45305
moderate squat	0.77	0.744362	1.37	1.44768		0.79	0.735957	1.51	1.43735		0.75	0.753943	1.37	1.44915		0.771872	0.774395	1.3745	1.48873		0.745718	0.744786	1.34028	1.44339		0.73	0.773848	1.38	1.48251		0.736378	1.35715
moderate squat	0.72	0.694765	1.35	1.44247		0.73	0.757425	1.35	1.45333		0.67	0.693566	1.31	1.44063		0.695237	0.679471	1.28492	1.39182		0.712316	0.69842	1.33174	1.44811		0.66	0.675659	1.28	1.39938		0.66429	1.30188
moderate squat	0.66	0.631616	1.26	1.34555		0.72	0.636527	1.42	1.33456		0.61	0.632158	1.2	1.34707		0.638723	0.618081	1.27581	1.38871		0.651402	0.629999	1.23396	1.34089		0.62	0.615258	1.25	1.38216		0.602018	1.26392
moderate squat	0.67	0.647508	1.19	1.26402		0.69	0.63791	1.33	1.24338		0.64	0.650017	1.18	1.26688		0.705817	0.700354	1.25017	1.34496		0.647532	0.639897	1.15985	1.25521		0.67	0.698204	1.22	1.33296		0.654148	1.19579
moderate squat	0.8	0.759865	1.42	1.49953		0.88	0.751382	1.61	1.49518		0.75	0.762599	1.39	1.50018		0.787906	0.779127	1.4165	1.51704		0.76738	0.762531	1.38578	1.49771		0.75	0.775934	1.43	1.51424		0.747099	1.4
moderate squat	0.73	0.701515	1.38	1.4694		0.83	0.711612	1.62	1.49075		0.67	0.700136	1.31	1.46648		0.661691	0.635117	1.28451	1.38768		0.727576	0.696387	1.37437	1.47841		0.65	0.647008	1.3	1.39995		0.655415	1.32014
moderate squat	0.74	0.727229	1.36	1.43597		0.81	0.721642	1.58	1.43694		0.7	0.72682	1.31	1.4359		0.726201	0.726464	1.32819	1.43252		0.724575	0.728547	1.32927	1.4364		0.69	0.727331	1.34	1.433		0.708412	1.3333
moderate squat	0.68	0.659983	1.32	1.39861		0.72	0.66529	1.59	1.40979		0.63	0.659244	1.25	1.39702		0.648813	0.64012	1.2453	1.35657		0.675307	0.662221	1.29396	1.40336		0.64	0.643049	1.26	1.36303		0.639226	1.28346
moderate squat	0.74	0.718194	1.39	1.48007		0.73	0.707876	1.25	1.47161		0.69	0.719637	1.34	1.48118		0.726562	0.716105	1.39693	1.51374		0.716896	0.713812	1.35912	1.47648		0.69	0.717974	1.39	1.50842		0.693903	1.36977
moderate squat	0.77	0.752454	1.37	1.49686		0.8	0.760167	1.43	1.51332		0.75	0.760605	1.39	1.49467		0.726812	0.723877	1.31604	1.43367		0.758978	0.75569	1.37771	1.50377		0.69	0.728175	1.29	1.44332		0.684916	1.27108
moderate squat	0.76	0.746655	1.38	1.53627		0.8	0.754764	1.54	1.54402		0.65	0.745539	1.28	1.53516		0.724864	0.726043	1.35916	1.50677		0.748517	0.750067	1.3851	1.53952		0.68	0.730335	1.33	1.51137		0.689467	1.33283
moderate squat	0.74	0.726662	1.37	1.51878		0.73	0.738874	1.3	1.53287		0.66	0.72497	1.33	1.51684		0.691719	0.688336	1.32679	1.46551		0.736104	0.731819	1.38251	1.52487		0.66	0.695274	1.28	1.47387		0.672411	1.31143
moderate squat	0.73	0.720058	1.37	1.52081		0.72	0.737892	1.28	1.52925		0.69	0.726556	1.37	1.5196		0.689102	0.683785	1.34213	1.48861		0.733525	0.724067	1.37595	1.52434		0.65	0.689175	1.31	1.49347		0.662242	1.33277
moderate squat	0.72	0.708532	1.39	1.5451		0.68	0.71571	1.3	1.55229		0.7	0.707546	1.41	1.54405		0.687683	0.682498	1.3646	1.51779		0.721496	0.711551	1.38376	1.54807		0.67	0.686197	1.32	1.52194		0.661766	1.34018
moderate squat	0.78	0.767853	1.55	1.78088		0.75	0.761282	1.36	1.79254		0.73	0.7675	1.53	1.77926		0.785201	0.77846	1.53907	1.73564		0.758344	0.75973	1.56854	1.78585		0.75	0.77953	1.51	1.74249		0.735151	1.45366
moderate squat	0.72	0.708716	1.51	1.75167		0.72	0.69962	1.5	1.75738		0.67	0.711141	1.49	1.75083		0.780729	0.767733	1.5492	1.73284		0.711348	0.709634	1.52996	1.75404		0.73	0.749092	1.5	1.73389		0.673106	1.4513
moderate squat	0.68	0.649319	1.51	1.75402		0.63	0.645531	1.36	1.76844		0.65	0.657107	1.51	1.75235		0.709551	0.688316	1.50359	1.7054		0.66598	0.647689	1.53359	1.75933		0.68	0.685387	1.43	1.71286		0.605533	1.41157
moderate squat	0.75	0.733458	1.6	1.83869		0.72	0.724671	1.54	1.84517		0.69	0.742133	1.58	1.83782		0.786157	0.785767	1.61465	1.81503		0.745838	0.729717	1.61472	1.84135		0.75	0.780225	1.58	1.81789		0.683153	1.50882
moderate squat	0.76	0.695857	1.72	1.97333		0.74	0.68448	1.61	1.99581		0.73	0.69664	1.72	1.97026		0.776475	0.741911	1.68695	1.89761		0.745791	0.687536	1.73434	1.98286		0.76	0.738047	1.63	1.90826		0.681128	1.61391
moderate squat	0.77	0.782749	1.63	1.86726		0.77	0.777573	1.54	1.90561		0.76	0.782239	1.68	1.86197		0.786009	0.791079	1.53273	1.72293		0.791197	0.784366	1.65637	1.88293		0.75	0.792039	1.52	1.74479		0.727213	1.4957
moderate squat	0.77	0.773765	1.64	1.89128		0.75	0.769202	1.46	1.91344		0.73	0.774433	1.59	1.88815		0.804343	0.801396	1.60259	1.8057		0.76972	0.771785	1.65036	1.90069		0.77	0.797823	1.57	1.81873		0.736831	1.53806
moderate squat	0.74	0.741326	1.6	1.88781		0.78	0.736039	1.73	1.89084		0.7	0.742073	1.56	1.88734		0.778073	0.762117	1.62064	1.87621		0.744897	0.739073	1.62336	1.88913		0.73	0.758703	1.55	1.87789		0.682296	1.50778
moderate squat	0.78	0.776838	1.65	1.89205		0.82	0.774864	1.66	1.9289		0.75	0.775879	1.67	1.8869		0.771034	0.762398	1.55771	1.75606		0.775024	0.779783	1.66863	1.90767		0.75	0.765631	1.53	1.77483		0.693221	1.49571
moderate squat	0.74	0.722752	1.6	1.87797		0.73	0.710742	1.6	1.90779		0.66	0.722179	1.45	1.87387		0.742159	0.735035	1.53904	1.76842		0.730166	0.71634	1.63127	1.89061		0.74	0.727969	1.46	1.78394		0.668745	1.46301
moderate squat	0.73	0.741092	1.48	1.6452		0.71	0.709409	1.38	1.60004		0.69	0.743209	1.37	1.6515		0.861532	0.859719	1.66468	1.82057		0.743354	0.726015	1.4708	1.62612		0.8	0.837207	1.61	1.79375		0.738564	1.4853
moderate squat	0.66		1.43	1.60615		0.59	0.592208	1.33	1.58268		0.66		1.37	1.60939		0.680351	0.646245	1.53594	1.69765		0.631894	0.604174	1.42962	1.5962		0.64	0.640951	1.47	1.68453		0.593225	1.39403
moderate squat	0.8	0.783054	1.61	1.80276		0.77	0.786232	1.47	1.79274		0.86	0.782619	1.68	1.80417		0.783185	0.779557	1.65372	1.8428		0.792032	0.784399	1.61096	1.79861		0.74	0.781279	1.6	1.83662		0.738664	1.54412
moderate squat	0.85	0.830202	1.68	1.87029		0.83	0.829446	1.53	1.85877		0.83	0.831667	1.63	1.87212		0.848804	0.84354	1.74786	1.91541		0.846086	0.825776	1.68821	1.86551		0.81	0.845914	1.69	1.90861		0.79404	1.62955
moderate squat	0.83	0.80972	1.72	1.91896		0.79	0.806182	1.54	1.92397		0.79	0.809052	1.63	1.91899		0.817526	0.819805	1.71506	1.90315		0.821749	0.803197	1.742	1.92113		0.77	0.821899	1.66	1.90583		0.775346	1.62
moderate squat	0.8	0.778449	1.59	1.78674		0.82	0.77561	1.35	1.77897		0.88	0.777675	1.46	1.78786		0.790004	0.767439	1.62534	1.81842		0.788057	0.780831	1.5865	1.7834		0.75	0.770257	1.54	1.81406		0.744785	1.5361
moderate squat	0.8	0.787802	1.55	1.74608		0.83	0.786069	1.35	1.72932		0.87	0.789405	1.36	1.74843		0.807641	0.806874	1.6218	1.8118		0.786847	0.782977	1.54856	1.7389		0.77	0.799802	1.55	1.80151		0.743822	1.50565
moderate squat	0.75	0.730549	1.54	1.74467		0.76	0.719938	1.46	1.70932		0.76	0.73209	1.25	1.74981		0.798376	0.786529	1.68381	1.88311		0.743188	0.725968	1.54502	1.72968		0.75	0.778944	1.61	1.8617		0.726168	1.55309
moderate squat	0.73	0.717938	1.57	1.76271		0.71	0.711983	1.41	1.76138		0.72	0.718974	1.28	1.76289		0.737894	0.726506	1.5918	1.76949		0.729867	0.708572	1.58024	1.7622		0.69	0.721654	1.53	1.76874		0.718277	1.51762
moderate squat	0.79	0.768561	1.56	1.75262		0.75	0.755578	1.3	1.71673		0.76	0.762442	1.45	1.75765		0.815569	0.807457	1.7098	1.89383		0.771285	0.762987	1.56471	1.73735		0.77	0.79862	1.63	1.87269		0.754606	1.53898
moderate squat	0.81	0.777896	1.49	1.66893		0.81	0.775967	1.53	1.64658		0.76	0.779781	1.44	1.67203		0.81601	0.786908	1.57778	1.75581		0.795179	0.772225	1.49184	1.6594		0.78	0.80062	1.55	1.74296		0.74085	1.45443
moderate squat	0.71	0.693287	1.43	1.60659		0.66	0.684155	1.23	1.59801		0.82	0.694567	1.31	1.60775		0.732811	0.73779	1.46772	1.64		0.699793	0.689398	1.43795	1.60298		0.69	0.73212	1.41	1.6349		0.666363	1.3825
moderate squat	0.67	0.658638	1.41	1.58681		0.68	0.660519	1.36	1.57609		0.65	0.659449	1.14			0.670409	0.662092	1.45473	1.63021		0.676844	0.656206	1.41543	1.58225		0.64	0.664903	1.39	1.62347		0.619506	1.36044
moderate squat	0.75	0.718209	1.55	1.73566		0.73	0.709007	1.48	1.72582		0.68	0.719408	1.32	1.73703		0.802623	0.806629	1.58101	1.77428		0.755249	0.714638	1.55498	1.7315		0.76	0.791568	1.53	1.76854		0.726614	1.51026
moderate squat	0.74	0.717309	1.51	1.69939		0.77	0.71308	1.68	1.68883		0.68	0.710878	1.38	1.70082		0.7145	0.700858	1.54183	1.74102		0.734184	0.71193	1.5122	1.69496		0.69	0.699597	1.46	1.73443		0.670431	1.44392
moderate squat	0.7	0.69752	1.36	1.4873		0.67	0.701218	1.26	1.49946		0.6	0.697014	1.28	1.48522		0.688246	0.684002	1.33603	1.44036		0.705555	0.69908	1.38469	1.49249		0.67	0.685985	1.32	1.44713		0.633343	1.28988
moderate squat	0.74	0.723536	1.37	1.52431		0.73	0.718514	1.29	1.50625		0.67	0.724252	1.4	1.52665		0.754925	0.745314	1.45202	1.59294		0.722673	0.721388	1.37572	1.51681		0.71	0.741985	1.4	1.58231		0.675354	1.32019
moderate squat	0.72	0.711154	1.33	1.46406		0.7	0.711418	1.23	1.46606		0.66	0.711134	1.36	1.4637		0.714643	0.719551	1.34418	1.45535		0.712374	0.71124	1.35075	1.46445		0.67	0.719266	1.34	1.4565		0.658819	1.25171
moderate squat	0.66	0.649286	1.36	1.51889		0.64	0.640158	1.3	1.51702		0.64	0.649667	1.36	1.519		0.691151	0.667847	1.38729	1.52687		0.669963	0.641643	1.37721	1.51827		0.63	0.665853	1.37	1.52557		0.625283	1.28628
moderate squat	0.75	0.751172	1.4	1.5517		0.73	0.750341	1.36	1.556		0.66	0.751302	1.35	1.55076		0.747053	0.74897	1.39727	1.53175		0.746051	0.75079	1.42472	1.55384		0.68	0.748248	1.38	1.53495		0.689552	1.31818
moderate squat	0.73	0.744583	1.4	1.5295		0.76	0.736921	1.62	1.52341		0.77	0.744574	1.55	1.53031		0.747526	0.746524	1.43279	1.55354		0.742341	0.744642	1.41095	1.52677		0.7	0.7379	1.41	1.54992		0.682549	1.33683
moderate squat	0.76	0.763973	1.41	1.53921		0.73	0.759667	1.34	1.53441		0.67	0.764585	1.41	1.53998		0.764099	0.774458	1.43256	1.56064		0.75449	0.762135	1.41988	1.53788		0.71	0.771602	1.39	1.55726		0.706895	1.35188
moderate squat	0.74	0.741144	1.42	1.5792		0.73	0.74682	1.27	1.56548		0.62	0.740359	1.25	1.58103		0.715265	0.713953	1.46358	1.62955		0.745452	0.743532	1.42848	1.57399		0.68	0.716964	1.43	1.62197		0.669767	1.35833
moderate squat	0.79	0.816883	1.46	1.6616		0.76	0.807076	1.38	1.65506		0.71	0.817049	1.36	1.66318		0.822084	0.832636	1.51088	1.68782		0.804847	0.816426	1.48973	1.65901		0.76	0.840119	1.48	1.68395		0.756808	1.43359
moderate squat	0.76	0.755732	1.45	1.61648		0.74	0.765412	1.47	1.64011		0.72	0.754387	1.5	1.61394		0.724446	0.734234	1.3834	1.52897		0.757529	0.759825	1.48594	1.62637		0.68	0.739851	1.34	1.54149		0.6936	1.35378
moderate squat	0.79	0.805001	1.36	1.50605		0.81	0.815654	1.4	1.5101		0.77	0.805016	1.3	1.50552		0.783074		1.35346	1.49119		0.799572	0.804979	1.38473	1.50774		0.75	0.81514	1.33	1.49328		0.731526	1.2944
moderate squat	0.83	0.81932	1.44	1.65299		0.82	0.812273	1.39	1.65276		0.79	0.820304	1.37	1.65304		0.839226	0.847589	1.46343	1.65278		0.811235	0.816325	1.47093	1.65286		0.8	0.843207	1.45	1.65264		0.770013	1.41947
moderate squat	0.79	0.793043	1.43	1.66644		0.82	0.787193	1.46	1.66018		0.78	0.793862	1.42	1.66699		0.7976	0.806078	1.46438	1.6916		0.786589	0.790558	1.46844	1.66359		0.75	0.802548	1.45	1.68764		0.730221	1.38641
moderate squat	0.81	0.788044	1.41	1.61928		0.77	0.787105	1.32	1.60287		0.78	0.789514	1.38	1.62156		0.814054	0.839945	1.48945	1.68357		0.790712	0.793083	1.44123	1.6121		0.77	0.833385	1.47	1.67338		0.740101	1.382
moderate squat	0.75	0.739424	1.38	1.57399		0.71	0.730397	1.4	1.5528		0.73	0.741896	1.39	1.57694		0.788865	0.810137	1.47534	1.65801		0.727356	0.740456	1.40597	1.565		0.73	0.799124	1.48	1.64492		0.687819	1.35223
moderate squat	0.78	0.773847	1.4	1.59031		0.74	0.770314	1.3	1.58522		0.73	0.774345	1.29	1.59098		0.790807	0.79818	1.42732	1.61001		0.772138	0.772338	1.41379	1.58819		0.75	0.795916	1.39	1.60695		0.722065	1.35268
moderate squat	0.82	0.832158	1.46	1.64258		0.83	0.829669	1.53	1.63799		0.83	0.832531	1.42	1.64312		0.842084	0.866859	1.48289	1.66106		0.831167	0.831069	1.47607	1.64063		0.8	0.853213	1.44	1.65794		0.785653	1.41414
moderate squat	0.81	0.819653	1.4	1.60915		0.79	0.800787	1.39	1.60738		0.78	0.820867	1.34	1.60942		0.835551	0.854416	1.43914	1.61855		0.80009	0.815976	1.43613	1.60824		0.78	0.848964	1.38	1.61694		0.755268	1.36279
moderate squat	0.8	0.782949	1.43	1.64013		0.77	0.782731	1.41	1.6407		0.78	0.782997	1.38	1.63988		0.792144	0.794963	1.45259	1.63796		0.786486	0.782825	1.46713	1.64041		0.76	0.794354	1.41	1.63801		0.730064	1.37542
moderate squat	0.79	0.774153	1.4	1.58043		0.77	0.764188	1.45	1.57102		0.75	0.775607	1.28	1.58141		0.808518	0.813554	1.45202	1.61702		0.770084	0.769928	1.41806	1.57609		0.78	0.80751	1.42	1.61127		0.745831	1.34169
moderate squat	0.8	0.78954	1.38	1.64793		0.85	0.776083	1.61	1.64959		0.71	0.789772	1.35	1.64858		0.786338	0.797842	1.42314	1.64395		0.772964	0.776918	1.41267	1.64867		0.73	0.796505	1.31	1.64465		0.668412	1.33648
moderate squat	0.74	0.720929	1.34	1.61821		0.74	0.718049	1.54	1.61348		0.82	0.721337	1.47	1.61923		0.731843	0.723328	1.41057	1.63628		0.722288	0.719696	1.38204	1.61607		0.7	0.721491	1.28	1.6336		0.649223	1.29525
moderate squat	0.74	0.737426	1.35	1.63253		0.83	0.723667	1.44	1.6206		0.76	0.739348	1.36	1.63462		0.775684	0.780545	1.45209	1.67794		0.733193	0.731586	1.37862	1.62717		0.74	0.77239	1.29	1.67142		0.680969	1.30715
moderate squat	0.68	0.689446	1.34	1.63589		0.72	0.684571	1.3	1.62079		0.79	0.691215	1.57	1.63771		0.721805	0.720107	1.44688	1.69346		0.682698	0.691925	1.3694	1.62961		0.68	0.712516	1.32	1.68468		0.620209	1.31276
moderate squat	0.66	0.657767	1.34	1.63615		0.68	0.65253	1.37	1.63327		0.56	0.658508	1.13	1.63666		0.692089	0.678949	1.40964	1.64457		0.666184	0.655537	1.37885	1.63496		0.67	0.675601	1.28	1.64314		0.588535	1.27734
moderate squat	0.86	0.836019	1.43	1.65205		0.86	0.847263	1.51	1.66156		0.8	0.834453	1.4	1.65114		0.804477	0.806226	1.4005	1.61538		0.842449	0.840771	1.4432	1.65596		0.76	0.812836	1.31	1.6209		0.739199	1.32778
moderate squat	0.77	0.763162	1.38	1.65247		0.74	0.763736	1.38	1.64656		0.78	0.753146	1.41	1.65324		0.76473	0.751828	1.4395	1.68113		0.765762	0.76339	1.40206	1.64934		0.73	0.751979	1.35	1.67625		0.694447	1.33606
moderate squat	0.79	0.813951	1.41	1.71696		0.83	0.8149	1.48	1.71357		0.86	0.813834	1.48	1.71627		0.819003	0.823832	1.46887	1.7284		0.802352	0.814346	1.44197	1.71475		0.75	0.824163	1.38	1.72604		0.739858	1.36514
moderate squat	0.77	0.771214	1.4	1.65839		0.75	0.765215	1.41	1.64957		0.76	0.77206	1.37	1.66095		0.797476	0.795898	1.45878	1.69633		0.767673	0.768654	1.40723	1.65543		0.74	0.792013	1.38	1.69037		0.693862	1.35392
moderate squat	0.79	0.793766	1.4	1.686		0.72	0.773053	1.32	1.66811			0.795028		1.68915		0.845806	0.844449	1.50517	1.75713		0.784667	0.789954	1.41453	1.67838		0.76	0.838738	1.43	1.74633		0.722672	1.36802
moderate squat	0.74	0.704078	1.51	1.80157		0.71	0.69522	1.41	1.81683		0.71	0.702955	1.41	1.79945		0.71204	0.706695	1.48769	1.74205		0.731693	0.698983	1.55224	1.80818		0.67	0.694541	1.42	1.75117		0.635678	1.38296
moderate squat	0.7		1.46	1.75042		0.66	0.623351	1.49	1.77534		0.61	0.62751	1.24			0.695762		1.42247	1.65372		0.682178		1.51471	1.76091		0.66	0.660361	1.37	1.66847		0.585015	1.33241
moderate squat	0.77	0.729361	1.56	1.91896		0.7	0.729548	1.56	1.9193		0.81	0.737947	1.61	1.9192		0.773843	0.771438	1.59895	1.91885		0.74909	0.7376	1.60588	1.91902		0.72	0.762578	1.52	1.91886		0.670993	1.46179
moderate squat	0.7	0.689468	1.53	1.89608		0.69	0.692139	1.48	1.89026		0.72	0.6891	1.55	1.89675		0.679897	0.672969	1.59468	1.91686		0.705387	0.690589	1.58303	1.89399		0.63	0.674364	1.5	1.9136		0.622556	1.42675
moderate squat	0.73	0.722433	1.54	1.88653		0.65	0.723023	1.57	1.89399		0.67	0.721322	1.37	1.88534		0.725095	0.721107	1.55071	1.86051		0.738511	0.718398	1.59212	1.88978		0.67	0.718538	1.45	1.86443		0.664094	1.46232
moderate squat	0.73	0.727727	1.48	1.74187		0.72	0.730933	1.33	1.75108		0.68	0.7273	1.35	1.74051		0.730034	0.726903	1.47678	1.7088		0.742262	0.729051	1.49784	1.74561		0.69	0.728104	1.41	1.71367		0.660138	1.35077
moderate squat	0.73	0.70391	1.56	1.90554		0.73	0.705314	1.44	1.89108		0.65	0.711294	1.4	1.90675		0.730747	0.714923	1.65866	1.95861		0.727864	0.704488	1.59886	1.89944		0.66	0.707734	1.56	1.95022		0.627252	1.45276
moderate squat	0.72	0.696768	1.67	1.98439		0.66	0.679201	1.53	1.98686		0.69	0.697074	1.48	1.98423		0.74706	0.731383	1.70004	1.97696		0.720643	0.68801	1.69223	1.98501		0.68	0.729631	1.62	1.9784		0.650995	1.50906
moderate squat	0.7	0.673423	1.64	1.96559		0.7	0.681265	1.68	1.99418		0.65	0.672339	1.46	1.96178		0.649069	0.65042	1.5725	1.85416		0.698597	0.676719	1.6796	1.97786		0.61	0.654778	1.49	1.87116		0.622438	1.43452
moderate squat	0.79	0.77316	1.72	1.98724		0.76	0.773259	1.59	1.98916		0.72	0.773158	1.52	1.98714		0.79261	0.781124	1.74707	1.98252		0.790277	0.773185	1.74117	1.98702		0.73	0.780984	1.65	1.98259		0.729924	1.53144
moderate squat	0.81	0.832741	1.41	1.56536		0.8	0.830634	1.32	1.56996		0.77	0.833057	1.36	1.56496		0.830533	0.832243	1.42165	1.5469		0.829529	0.831834	1.42805	1.56744		0.8	0.83065	1.38	1.54989		0.78551	1.39987
moderate squat	0.82	0.819783	1.37	1.44787		0.8	0.842551	1.28	1.47924		0.73	0.816626	1.28	1.44381		0.745173	0.75431	1.24538	1.32935		0.823831	0.829395	1.37356	1.4616		0.73	0.767694	1.23	1.34694		0.720869	1.26519
moderate squat	0.8	0.790514	1.4	1.5166		0.8	0.805446	1.41	1.54345		0.71	0.788439	1.25	1.5133		0.739297	0.75124	1.31238	1.41317		0.793843	0.796831	1.41102	1.52789		0.73	0.759883	1.3	1.42891		0.727194	1.31144
moderate squat	0.85	0.846866	1.43	1.54443		0.98	0.865312	1.7	1.5886		0.83	0.844316	1.39	1.53857		0.772736	0.787107	1.27307	1.37768		0.844623	0.854645	1.44297	1.56345		0.76	0.797516	1.26	1.40269		0.762197	1.32934
moderate squat	0.85	0.846152	1.3	1.35521		0.95	0.863798	1.82	1.39326		0.77	0.842098	1.19	1.35056		0.73868	0.744094	1.13704	1.21728		0.841647	0.847228	1.29995	1.37166		0.7	0.761301	1.12	1.23921		0.736656	1.21495
moderate squat	0.79	0.78774	1.41	1.53659		0.82	0.798306	1.37	1.54678		0.8	0.786279	1.38	1.53526		0.771121	0.748464	1.37801	1.49876		0.788588	0.792201	1.407	1.54089		0.74	0.754244	1.35	1.50397		0.743294	1.37465
moderate squat	0.79	0.783965	1.38	1.49235		0.79	0.785299	1.37	1.51736		0.82	0.784009	1.38	1.4888		0.765872	0.775403	1.30251	1.40413		0.781867	0.792979	1.38714	1.50283		0.74	0.780756	1.3	1.41568		0.753098	1.32673
moderate squat	0.84	0.858347	1.37	1.50872		0.85	0.875255	1.4	1.54288		0.83	0.854564	1.31	1.50272		0.751537	0.763187	1.25558	1.3735		0.835909	0.869852	1.37601	1.52278		0.73	0.779162	1.25	1.39372		0.754726	1.30352
moderate squat	0.75	0.768843	1.18	1.27263		0.78	0.775817	1.19	1.27736		0.74	0.766672	1.12	1.27251		0.698991	0.702646	1.17009	1.26359		0.751306	0.766889	1.17845	1.27441		0.67	0.711573	1.15	1.26381		0.690355	1.14416
moderate squat	0.77	0.766215	1.22	1.37597		0.76	0.766215	1.24	1.40938		0.79	0.76509	1.21	1.37132		0.735253	0.744394	1.21468	1.34446		0.750777	0.769656	1.22988	1.39005		0.7	0.748788	1.2	1.33956		0.710085	1.20909
moderate squat	0.68	0.670813	1.04	1.08932		0.68	0.672162	1.19	1.09559		0.6	0.670636	0.99	1.08833		0.672121	0.673756	1.01532	1.071		0.665515	0.671376	1.02571	1.09197		0.65	0.674341	1.02	1.07281		0.668544	1.07979
moderate squat	0.77	0.779738	1.39	1.51298		0.78	0.78132	1.48	1.52097		0.8	0.779511	1.35	1.51183		0.774037	0.773706	1.36081	1.48225		0.779455	0.780411	1.38188	1.51638		0.75	0.774611	1.35	1.48695		0.777009	1.49935
moderate squat	0.74	0.742358	1.41	1.59292		0.7	0.745134	1.27	1.6025		0.74	0.743135	1.36	1.59157		0.746924	0.749272	1.38925	1.55691		0.729102	0.740056	1.41028	1.59701		0.7	0.745376	1.37	1.56227		0.744043	1.57669
moderate squat	0.76	0.755909	1.37	1.5254		0.75	0.776123	1.38	1.54716		0.8	0.75424	1.38	1.52241		0.715861	0.715733	1.30931	1.44198		0.758754	0.761086	1.38436	1.53461		0.68	0.720569	1.36	1.45473		0.736562	1.48819
moderate squat	0.68	0.68282	1.36	1.52949		0.66	0.68551	1.33	1.54378		0.66	0.682456	1.24	1.5275		0.667296	0.666664	1.33022	1.47689		0.679794	0.683935	1.36553	1.53543		0.6	0.667752	1.36	1.48431		0.671607	1.50505
moderate squat	0.89	0.868347	1.65	1.82471		0.91	0.882555	1.78	1.85459		0.85	0.866366	1.61	1.8206		0.83291	0.834598	1.54952	1.70951		0.874578	0.874366	1.65249	1.83727		0.79	0.843016	1.52	1.72711		0.807012	1.52437
moderate squat	0.77	0.774451	1.52	1.68388		0.82	0.772759	1.66	1.70604		0.73	0.765911	1.42	1.68078		0.755095	0.741287	1.45781	1.59881		0.767471	0.776568	1.51587	1.69327		0.72	0.743626	1.42	1.61172		0.716542	1.44688
moderate squat	0.8	0.811301	1.52	1.70728		0.82	0.818112	1.43	1.73886		0.83	0.810378	1.5	1.70287		0.771854	0.769708	1.41801	1.58565		0.802609	0.814145	1.52261	1.72058		0.73	0.781296	1.38	1.60422		0.745086	1.41828
moderate squat	0.82	0.826176	1.64	1.86425		0.87	0.836718	1.7	1.88163		0.86	0.82593	1.61	1.86186		0.807487	0.804254	1.61401	1.79783		0.823457	0.835618	1.64632	1.8715		0.77	0.813311	1.52	1.80842		0.778021	1.53691
moderate squat	0.78	0.773102	1.54	1.7204		0.82	0.77236	1.6	1.72026		0.79	0.773229	1.5	1.72042		0.782276	0.779411	1.54849	1.72108		0.772088	0.77275	1.53607	1.72035		0.75	0.778029	1.47	1.72082		0.733169	1.47318
SJ	1.05	0.933776	2.07	2.18445							0.92	0.935232	1.89	2.18736		1.02781	0.990523	1.98106	2.28548		1.09081	0.929363	2.07991	2.17307		0.96	0.983818	1.95	2.27018		0.942092	1.9849
SJ	1.05	0.950705	2.1	2.20511		1.04	0.936407	1.95	2.18083		0.84	0.952712	1.82	2.20831		1.02941	0.994599	2.0018	2.30257		1.09016	0.944623	2.10769	2.19454		0.96	0.985879	1.95	2.28836		0.94145	2.01221
SJ	1.02	0.913826	2.07	2.18595		0.95	0.904458	2.02	2.16169		0.89	0.915137	1.99	2.1897		0.992185	0.953039	1.96808	2.28293		1.04731	0.909841	2.07073	2.17524		0.93	0.947207	1.9	2.26782		0.901201	1.97229
SJ	1	0.897797	2.07	2.16034		1.03	0.883136	1.87	2.12317		0.96	0.899863	2.1	2.16494		0.953431	0.896549	1.94411	2.30234		1.01711	0.891555	2.0835	2.14425		0.92	0.887336	1.83	2.28025		0.838683	1.96242
SJ	0.9	0.842138	2.06	2.17209		0.96	0.839615	1.94	2.14378		0.88	0.843761	2.12	2.17605			0.824121	1.95061	2.28296			0.846221	2.06464	2.1594			0.824502	1.86	2.26666		0.829655	1.9629
SJ	1.2	1.19312	2.17	2.31647		1.19	1.21759	2.06	2.34376		1.06	1.18975	1.85	2.31202		1.1502	1.13496	2.05925	2.20905		1.28851	1.20341	2.23359	2.32722		1.07	1.14889	2.03	2.22557		1.1038	2.05114
SJ	1.06	0.959379	2	2.13772		0.93	0.951941	1.78	2.12459		0.91	0.96042	1.7	2.13972		1.06332	1.00395	2.05224	2.19428		1.28371	0.956209	2.17125	2.13191		0.97	0.998947	2	2.18482		0.92718	1.97036
SJ	1.1	1.04664	2	2.12988		0.99	1.04	1.82	2.12088		0.95	1.04757	1.72	2.13161		1.09961	1.08828	2.04397	2.16932		1.23989	1.04383	2.11596	2.12594		1.03	1.08426	1.99	2.16396		0.974334	1.9599
SJ	1.09	1.0099	2.01	2.14725		1.02	1.01984	1.95	2.14534		0.95	1.01049	1.77	2.14701		1.05221	0.85933	2.01662	2.15342		1.22481	1.00812	2.10663	2.14649		1	0.997276	1.98	2.15147		0.919681	1.95959
SJ	1.05	1.01923	1.99	2.145		1.09	1.02041	2.11	2.15704		0.92	1.03415	1.68	2.14385		1.06644	1.03462	1.959	2.10547		1.24651	1.01967	2.07756	2.15053		1	1.03395	1.91	2.11146		0.939748	1.92313
SJ	1.14	1.13713	2.1	2.36382		1.08	1.14745	2	2.35976		1.01	1.13569	1.89	2.36489		1.12675	1.11614	2.14628	2.37856		1.14133	1.14149	2.14345	2.36142		1.06	1.1221	2.1	2.37705		1.05547	2.05041
SJ	1.11	1.11884	2.13	2.31641		1.08	1.11403	2.01	2.30519		0.98	1.11952	1.82	2.31831		1.12032	1.1053	2.16604	2.36885		1.12023	1.11678	2.12199	2.31185		1.03	1.10226	2.13	2.36046		1.04037	2.08025
SJ	1.12	1.11188	2.17	2.40011		1.13	1.13229	2	2.42902		0.97	1.10905	1.84	2.39646		1.05164	1.01687	2.07362	2.28935		1.12911	1.12052	2.18605	2.41293		0.98	1.02832	2.01	2.30716		0.961201	2.05598
SJ	1.09	1.05829	2.12	2.3128		0.99	1.0724	1.83	2.32903		0.97	1.04108	1.86	2.31065		1.02671	0.961691	2.08161	2.25446		1.09097	1.06426	2.12344	2.31937		0.98	0.983498	2.01	2.26323		0.941186	2.0455
SJ	1.1	1.07413	2.13	2.34454		1.03	1.06656	1.85	2.35562		0.98	1.073	1.87	2.34279		1.08891	1.07491	2.11294	2.31445		1.10131	1.0776	2.13106	2.34899		1.02	1.06341	2.02	2.31754		1.00304	2.03408
SJ	0.97	0.897638	1.8	1.88917		1.07	0.897541	1.76	1.87058		0.85	0.899371	1.57	1.89167		0.982211	0.947015	1.83544	1.95976		0.937177	0.904696	1.76262	1.88108		0.92	0.939317	1.82	1.94855		0.881352	1.83189
SJ	0.88	0.846071	1.68	1.75755		0.99	0.832395	1.59	1.7423		0.79	0.846495	1.46	1.75985		0.902437	0.880599	1.71544	1.81751		0.877943	0.844821	1.65828	1.75114		0.85	0.878276	1.71	1.80888		0.836502	1.697
SJ	0.91	0.862679	1.64	1.70868		0.96	0.848881	1.74	1.68076		0.8	0.864635	1.47	1.71259		0.91018	0.885265	1.72649	1.82181		0.876273	0.856773	1.6159	1.69679		0.85	0.887773	1.71	1.80439		0.85182	1.68644
SJ	0.9	0.86366	1.67	1.74533		1	0.856476	1.67	1.73478		0.83	0.864659	1.49	1.74691		0.917468	0.892316	1.68786	1.78796		0.89346	0.860597	1.64106	1.74103		0.86	0.887839	1.64	1.78136		0.849678	1.66732
SJ	0.89	0.859273	1.65	1.7429		1.01	0.859869	1.65	1.73382		0.78	0.860747	1.45	1.74441		0.876705	0.882433	1.65736	1.78892		0.867555	0.854861	1.63136	1.73905		0.84	0.875239	1.62	1.78112		0.841426	1.66908
SJ
SJ
SJ	0.98	0.945744	1.75	1.85578							0.85	0.947037	1.56	1.85683		0.952594	0.96844	1.74097	1.87965		0.939479	0.941863	1.72274	1.85357		0.91	0.977304	1.76	1.8767		0.919132	1.76552
SJ	1.02	1.03037	1.84	1.96821							0.93	1.02846	1.69	1.96519		0.967533	0.992244	1.73625	1.88368		1.01092	1.03617	1.82048	1.97725		0.93	1.00019	1.76	1.89689		0.976938	1.8364
SJ	0.95	0.906924	1.67	1.7428							0.84	0.907014	1.51	1.7423		0.912211	0.924033	1.64106	1.75099		0.918359	0.906715	1.6386	1.74197		0.88	0.923211	1.65	1.74923		0.871594	1.67192
SJ	0.97	0.999281	1.83	1.93799							0.89	1.00276	1.61	1.94259		1.10907	1.06974	1.95021	2.06637		0.980667	0.988765	1.77541	1.92413		1.02	1.0698	1.93	2.04682		1.0065	1.88178
SJ
SJ	1.04	1.07798	2	2.13593							0.96	1.073	1.77	2.13009		1.0258	0.996963	1.8237	1.97767		1.05604	1.0778	1.94885	2.15374		0.97	0.999203	1.85	2.00138		1.03325	1.92899
SJ	1	0.988346	1.86	2.00822							0.93	0.988289	1.69	2.00655		1.026	0.989467	1.83183	1.96368		0.994736	1.00437	1.81675	2.01326		0.96	0.988972	1.85	1.96992		0.97032	1.84342
SJ	0.96	0.977876	1.84	1.95247							0.93	0.977891	1.74	1.95139		0.988929	0.989148	1.78611	1.92462		0.952608	0.978026	1.77063	1.95587		0.93	0.985948	1.78	1.92847		0.94824	1.78244
SJ	1.02	1.01325	1.86	1.97435		0.95	1.00694	1.54	1.95847		0.96	1.01622	1.71	1.97649		1.08538	1.06237	1.92466	2.04148		1.01195	1.01878	1.80296	1.96759		1.02	1.06136	1.91	2.02998		1.00947	1.88301
SJ	0.93	0.889254	1.87	2.00129			0.88392		1.9899		0.85	0.900109	1.62	2.00292		0.974444	0.947591	1.89352	2.04716		0.914953	0.886957	1.80975	1.99644		0.92	0.943584	1.88	2.04032		0.888195	1.90833
SJ	0.98	0.899713	1.89	2.03171		0.87	0.915062	1.65	2.02904		0.91	0.899278	1.71	2.03207		0.954378	0.790728	1.88179	2.0432		0.940491	0.9015	1.85165	2.0305		0.88	0.802393	1.89	2.0416		0.829071	1.88815
SJ	0.86	0.7898	1.83	1.96241		0.83	0.794763	1.53	1.94105		0.81	0.791855	1.58	1.9655		0.929003	0.739172	1.88723	2.04681		0.846985	0.803477	1.76229	1.95345		0.84	0.732075	1.87	2.03413		0.728926	1.87225
SJ	0.97	0.927749	1.84	1.9654		0.85	0.913714	1.6	1.9514		0.88	0.929481	1.64	1.96726		1.02159	0.994335	1.88278	2.02045		0.925627	0.922526	1.78388	1.95945		0.96	0.986115	1.85	2.0121		0.91538	1.85036
SJ	1.12	0.88884	2.05	2.15821		1.02	0.888036	1.85	2.14828		0.99	0.887568	1.95	2.16005		1.10734	0.97728	2.06406	2.20241		1.0552	0.892702	2.01943	2.1543		1.02	0.980802	2.03	2.19502		0.835387	2.00613
SJ	1.1	1.0737	2.08	2.22956		1.09	1.0851	1.92	2.22842		0.98	1.07215	1.96	2.23098		1.11912	1.04836	2.0728	2.23817		1.10815	1.07849	2.06534	2.22944		1.02	1.03893	2.04	2.23681		1.00407	2.03392
SJ	1.09	1.00947	2.05	2.18681		1.03	1.00131	1.87	2.18578		0.95	1.00869	1.98	2.18647		1.08324	1.00369	2.03285	2.18844		1.07302	1.01185	2.03633	2.18631		0.99	1.00677	2.02	2.18793		0.964814	2.00501
SJ	1.03	0.92535	2.03	2.15475		0.98	0.923359	1.98	2.13853		0.9	0.925634	1.83	2.15744		1.04088	0.854152	2.05611	2.21874		1.03171	0.924497	1.99481	2.14884		0.97	0.874545	2.02	2.20953		0.872999	1.98374
SJ	1.07	1.02031	2.05	2.18656		1.06	1.02955	1.92	2.18928		0.87	1.01903	1.79	2.1856		1.06659	0.998823	2.02253	2.1772		1.08649	1.02421	2.03477	2.18688		0.98	0.990772	2.01	2.17866		0.951578	1.99513
SJ	1.07	0.947521	2.14	2.2635		1.03	0.906106	1.98	2.26236		0.98	0.959156	1.96	2.26333		1.14918	1.05668	2.13325	2.26627		1.10711	0.937459	2.11272	2.26326		1.07	1.05834	2.11	2.26626		0.978028	2.09888
SJ				2.23341		0.96	0.885269	1.97	2.22215					2.23423					2.2753					2.2282					2.26827			2.07138
SJ	1.12	1.08658	2.1	2.21533		1.06	1.09332	1.86	2.21144		0.95	1.08564	1.94	2.21584		1.10639	1.06156	2.09274	2.23647		1.0811	1.08942	2.07399	2.2137		1.05	1.06524	2.07	2.23293		0.992503	2.06021
SJ	1.08	0.998829	2.07	2.17908		0.87	1.01158	1.8	2.1768		0.94	0.999095	1.9	2.1797		1.05897	0.992081	2.04836	2.18993		1.05667	0.99806	2.04339	2.17823		1.02	0.990917	2.03	2.18842		0.880402	2.03197
SJ	1.06	1.00895	2.05	2.15893		1.02	1.00774	1.84	2.15482		0.93	1.00912	1.88	2.15882		1.03771	0.999607	2.02649	2.17161		1.04637	1.00843	2.01433	2.15723		1.01	0.998872	2	2.16989		0.940396	1.98981
SJ											0.88	0.862267	1.78	2.01498		0.794084	0.708026	1.65875	1.75886			0.892598	1.96981	2.05439		0.77	0.725519	1.71	1.7987		0.774586	1.82497
SJ													1.76	2.07493				1.95781	2.12578				1.92244	2.06726				1.92	2.1177			1.94137
SJ	1.04	1.02419	1.96	2.07602		1.02	1.00684	1.82	2.05271		0.9	1.02661	1.8	2.07927		1.07833	1.07555	1.99295	2.16659		1.0268	1.01684	1.90198	2.06615		1.02	1.06528	1.94	2.15318		1.00776	1.96189
SJ	1.1	1.07659	2.06	2.17145		1.06	1.07489	1.83	2.18491		0.96	1.07685	1.91	2.1696		1.06798	1.08459	1.95379	2.12111		1.09472	1.07586	2.01069	2.17718		1.04	1.08325	1.93	2.12885		1.0304	2.02516
SJ	1.12	1.0837	2.07	2.19106		1.1	1.11461	2.02	2.21903		0.98	1.08213	1.95	2.18711		1.02942	0.989639	1.91036	2.08661		1.12554	1.10785	2.04789	2.20289		1	1.01242	1.89	2.102		1.01541	2.03862
SJ	1.08	1.09645	2.13	2.23629		1.11	1.12412	2.01	2.28061		0.96	1.09274	1.91	2.23033		1.01523	0.981884	1.91238	2.06938		1.10894	1.12251	2.10217	2.25486		0.95	1.00988	1.93	2.09474		1.01105	2.01826
SJ	1.04	1.0129	2.1	2.2285		0.99	1.0156	1.81	2.23611		0.91	1.01252	1.87	2.22747		1.01635	0.989574	2.01749	2.20048		1.04699	1.01403	2.06312	2.23173		0.89	0.990912	2.04	2.20438		0.955927	2.06143
SJ	1.13	1.11912	2.14	2.25639		1.13	1.12779	1.92	2.28996		0.98	1.11796	1.96	2.25176		1.05198	1.09103	1.95744	2.13822		1.11333	1.12273	2.11979	2.27055		0.99	1.09505	2.02	2.15473		1.11946	2.14259
SJ	1.13	1.14864	2.14	2.30285		1.19	1.16353	1.88	2.34777		0.97	1.12837	1.94	2.29664		1.01212	1.05886	1.90851	2.13198		1.15615	1.15493	2.12012	2.32188		0.92	1.08346	1.99	2.15693		1.05564	2.05806
SJ	1.14	1.10528	2.13	2.23546		1.08	1.11631	2.02	2.26796		0.97	1.10377	1.96	2.23104												0.93	1.07213	2.02	2.1338		1.0257	2.05775
SJ	1.04	1.01145	2.04	2.16534		0.88	1.00502	1.87	2.1638		0.88	1.01058	1.8	2.16562		1.07297	1.00147	2.00234	2.17342		1.0294	1.01412	2.01812	2.16472		1.01	1.00503	1.99	2.17194		0.949389	2.02359
SJ	1.02	0.980378	1.96	2.10411		0.92	0.983953	1.78	2.10391		0.85	0.979898	1.71	2.10428		1.04854	0.980695	1.94863	2.11239		1.03114	0.981865	1.95481	2.10405		0.99	0.982379	1.92	2.11072		0.960974	1.96957
SJ	1.02	0.974785	1.96	2.09525		1.1	0.974799	1.78	2.10898		0.85	0.973077	1.72	2.09339		1.0211	0.952957	1.89349	2.04318		1.02907	0.979992	1.94627	2.10104		0.97	0.959852	1.85	2.05112		0.928321	1.94221
SJ	0.98	0.929477	1.89	2.01594		0.94	0.937553	1.75	2.01973		0.8	0.928367	1.64	2.01534		0.962894	0.911273	1.85792	2.00175		0.973043	0.932884	1.87934	2.01747		0.95	0.904352	1.78	2.00387		0.880239	1.88373
SJ	0.97	0.912388	1.95	2.04539		0.76	0.815868	1.92	2.05235		0.8	0.91127	1.71	2.04443		0.950335	0.893044	1.88945	2.02257		0.952974	0.915803	1.92779	2.0483		0.95	0.897702	1.82	2.02541		0.854853	1.93994
SJ						1.44	1.39083	2.34	2.91132		1.17	1.38698	2.39	2.87643		1.32449	1.37495	2.49579	2.76178		1.34466	1.38887	2.60111	2.89311		1.21		2.41			1.2214	2.52515
SJ	1.24	1.19969	2.53	2.79143		1.21	1.20032	2.33	2.81208		1.09	1.19962	2.29	2.78732		1.32097	1.21561	2.45639	2.71986		1.29285	1.19993	2.51459	2.7992		1.23	1.21519	2.37	2.73007		1.17019	2.46089
SJ	1.3	1.3114	2.46	2.76261		1.24	1.3075	2.22	2.7883		1.13	1.31194	2.26	2.75921		1.28133	1.32631	2.40864	2.68377		1.27148	1.30973	2.46995	2.77327		1.19	1.32377	2.29	2.69475		1.13887	2.42804
SJ	1.27	1.2752	2.45	2.69857		1.14	1.27243	2.33	2.73222		1.09	1.2756	2.33	2.69347		1.24742	1.2873	2.32158	2.56793		1.24295	1.274	2.43854	2.71272		1.16	1.2853	2.34	2.58691		1.10595	2.3878
SJ	1.18	1.17182	2.44	2.7052		1.2	1.17884	2.34	2.72719		1.05	1.17127	2.2	2.70278		1.23751	1.1154	2.36698	2.62531		1.26991	1.18909	2.41234	2.71429		1.23	1.13121	2.38	2.63711		1.13551	2.41192
SJ	1.26	1.19196	2.41	2.6539		1.15	1.17548	2.23	2.65536		1.1	1.19427	2.21	2.65347		1.2733	1.23878	2.41099	2.65172		1.22126	1.18495	2.38241	2.65399							1.10589	2.39704
SJ	1.26	1.29148	2.56	2.772		1.21	1.28179	2.24	2.78935		1.17	1.29284	2.44	2.76956		1.31764	1.3301	2.5074	2.70634		1.26791	1.28736	2.53201	2.77977		1.25	1.32407	2.48	2.71686		1.24238	2.49735
SJ	1.22	1.20091	2.43	2.67717		1.1	1.13967	2.27	2.65816		1.11	1.20491	2.27	2.68014		1.34978	1.37462	2.54839	2.77848		1.17943	1.17187	2.38786	2.6697		1.25	1.35624	2.49	2.76275		1.15812	2.46717
SJ	1.28	1.33582	2.48	2.76655		1.31	1.31179	2.37	2.79194		1.05	1.3364	1.97	2.76333		1.33065	1.35281	2.41439	2.67455		1.31321	1.33406	2.47108	2.77703		1.23	1.35005	2.33	2.68876		1.22186	2.42604
SJ	1.28	1.2723	2.38	2.65594		1.28	1.25114		2.64531		1.11	1.27528	2.15	2.65731		1.2936	1.31668	2.45725	2.70188		1.22474	1.26329	2.35487	2.65173		1.23	1.30381	2.41	2.69544		1.19891	2.42462
SJ	1.16	1.15879	2.31	2.55524		1.12	1.14862	2.1	2.56687		1.04	1.16023	2.15	2.55346		1.19659	1.20045	2.30943	2.51813		1.14701	1.15446	2.2886	2.55948		1.14	1.19386	2.28	2.52032		1.06882	2.31568
SJ	1.18	1.12064	2.36	2.52475		1.11	1.1089	2.18	2.50525		1.04	1.1223	1.98	2.5275		1.16051	1.15527	2.39314	2.60359		1.15729	1.11563	2.33615	2.51665		1.14	1.14775	2.37	2.59119		1.05823	2.3254
SJ	1.12	1.07799	2.29	2.44677		0.98	1.0627	1.96	2.40685		1	1.08013	1.92	2.45236		1.18661	1.14164	2.41053	2.59984		1.14258	1.05817	2.25759	2.42974		1.1	1.13143	2.39	2.57704		1.06897	2.28543
SJ	1.11	1.0582	2.34	2.52509		1.09	1.04227	1.89	2.50116		0.98	1.06045	1.93	2.5287		1.21932	1.13639	2.39719	2.61875		1.15782	1.05142	2.31466	2.51456		1.07	1.12624	2.4	2.60519		1.05027	2.30914
SJ	1.05	1.01571	2.21	2.39027		0.98	0.99913	1.99	2.36306		0.93	1.00625	1.85	2.39403		1.1535	1.07315	2.32552	2.50277		1.0905	1.0086	2.18665	2.37869		1.04	1.06207	2.31	2.48636		1.00115	2.24324
SJ		0.892198	2.23	2.37299		0.93	0.895265	2.11	2.35055		0.89	0.892891	1.78	2.37554																	0.852903	2.22694
SJ	1.16	1.08897	2.32	2.47728		0.77	0.924511	2.21	2.46581		1.05	1.10557	1.97	2.47943		1.17383	1.16358	2.33664	2.52245		1.13468	1.07106	2.28882	2.47272		1.13	1.15945	2.3	2.51593		1.05524	2.26791
SJ	1.15	1.07431	2.27	2.45017		0.9	0.920663	2.13	2.41739		1.02	1.06107	1.96	2.45455		1.18411	1.16224	2.37588	2.57571		1.11339	0.965112	2.24119	2.43579		1.1	1.15399	2.35	2.55702		1.03483	2.25523
SJ	1.11	0.959224	2.27	2.42738		1.07	0.944843	1.97	2.40118		0.99	0.96129	1.89	2.4321		1.11538	1.03277	2.34198	2.53146		1.07679	0.95303	2.23329	2.41631		1.06	1.02324	2.3	2.51527		0.975281	2.23702
SJ	1.12	0.995716	2.2	2.36721		1.08	0.978007	2.06	2.34267		0.98	0.996369	1.86	2.37111		1.10704	1.03269	2.28172	2.46812		1.08011	0.993779	2.18215	2.35679		1.05	1.02857	2.25	2.45233		0.966932	2.16218
SJ	1.16	1.12703	2.34	2.53044		1.1	1.11194	2.1	2.51192		1.05	1.12894	1.98	2.53308		1.22741	1.18532	2.37834	2.60185		1.20693	1.11966	2.3117	2.52282		1.15	1.17606	2.37	2.59109		1.08338	2.28121
SJ	1.17	1.1091	2.19	2.38848		1.12	1.13001	2.02	2.4039		1.03	1.10879	2.08	2.38752		1.12615	1.1023	2.14384	2.33287		1.14812	1.12853	2.2013	2.39474		1.04	1.10314	2.12	2.34118		0.997241	2.08162
SJ	1.17	1.10799	2.16	2.35322		1.07	1.11002	2.09	2.35706		1.02	1.10774	2.04	2.35307		1.12942	1.08594	2.13465	2.33911		1.15176	1.10878	2.15819	2.35507		1.04	1.08612	2.1	2.34161		0.970547	2.043
SJ	1.05	0.981732	2.07	2.26442		0.81	0.78224	2.02	2.24966		0.9	0.983415	1.91	2.26629		1.09704	1.04608	2.12957	2.32052		1.04393	0.961364	2.06806	2.2583		1.01	1.03868	2.09	2.31189		0.915446	1.99571
SJ	1.07	1.05594	2.07	2.25898		1.11	1.0467	2.21	2.27081		0.95	1.05482	1.86	2.25731		1.0733	1.02549	2.02496	2.21193		1.08866	1.05935	2.07939	2.26443		0.98	1.02996	2.01	2.21877		0.887634	1.97569
SJ	1.14	1.08332	2.11	2.30854		1.2	1.08771	2.18	2.32609		1.02	1.08274	1.89	2.30627		1.08618	1.03478	2.04043	2.24228		1.13556	1.08514	2.11703	2.3169			1.05349		2.25275		0.944249	1.97663
SJ	1.15	1.12269	2.26	2.4917		1.19	1.1128	2.23	2.50794		1.11	1.12138	2.19	2.48963		1.14801	1.12595	2.19972	2.43037		1.18139	1.10741	2.27257	2.49849		1.06	1.13144	2.16	2.43948		1.00671	2.10312
SJ	1.16	1.17443	2.15	2.33342		1.24	1.17591	2.13	2.33909		1.02	1.17423	2.08	2.33278		1.12511	1.11418	2.13501	2.31617		1.19195	1.17502	2.15588	2.33563		1.05	1.11412	2.08	2.31801		1.00958	2.05312
SJ	1.1	1.08189	2.09	2.25062		1.1	1.06149	2.25	2.24562		0.98	1.08231	1.97	2.25117		1.09604	1.07761	2.09214	2.2673		1.10025	1.06322	2.08788	2.24838		1.01	1.07568	2.07	2.2643		0.917939	2.00053
SJ	1.16	1.13839	2.22	2.44707		1.28	1.14849	2.24	2.46771		1.01	1.13698	1.95	2.4433		1.1367	1.08183	2.15296	2.36813		1.17995	1.14265	2.237	2.45583		1.06	1.08751	2.12	2.3792		1.00689	2.07823
SJ	1.11	1.10391	2.12	2.32026		1.02	1.10685	2.06	2.32702		0.97	1.12269	1.94	2.31829		1.12785	1.13115	2.0973	2.29046		1.13634	1.10514	2.13548	2.32298		1.04	1.13288	2.06	2.29484		0.943636	2.01792
SJ	1.3	1.24867	2.41	2.61184		1.15	1.24571	2.11	2.62449		1.12	1.24629	2.06	2.60986		1.24665	1.2438	2.32723	2.565		1.24425	1.25591	2.39526	2.61773		1.16	1.25387	2.3	2.57135		1.15646	2.27267
SJ	1.32	1.31113	2.51	2.74257		1.31	1.31036	2.29	2.74315		1.17	1.31126	2.15	2.74274		1.2951	1.29612	2.47979	2.74065		1.34137	1.31076	2.49548	2.74337		1.22	1.29469	2.43	2.74185		1.20107	2.40648
SJ	1.31	1.29727	2.38	2.61361		1.33	1.30087	2.37	2.61388		1.12	1.29677	2.04	2.61311		1.29416	1.28557	2.36095	2.61222		1.30883	1.29877	2.37323	2.6144		1.19	1.28712	2.32	2.61219		1.14089	2.22762
SJ	1.32	1.24357	2.43	2.63139		1.26	1.25173	2.35	2.63833		1.13	1.24245	2.1	2.63606		1.23273	1.21833	2.35914	3.07538		1.24431	1.24702	2.41781	2.62166		1.18	1.24333	2.33	3.05894		1.16329	2.30026
SJ	1.34	1.28469	2.41	2.62177		1.28	1.27913	2.2	2.60741		1.16	1.28547	2.15	2.62314		1.25122	1.3075	2.43742	2.67847		1.24357	1.28231	2.39324	2.61538		1.24	1.30391	2.4	2.66965		1.19708	2.35727
SJ	1.21	1.23259	2.43	2.62706		1.21	1.23394	2.18	2.63371		1.12	1.23242	2.11	2.6262		1.19927	1.20877	2.36949	2.60275		1.23173	1.23314	2.40722	2.63033		1.15	1.2092	2.36	2.60643		1.14475	2.30174
SJ	1.28	1.29583	2.43	2.66176		1.29	1.28075	2.25	2.64777		1.15	1.29793	2.13	2.664		1.25739	1.30781	2.43614	2.71593		1.23924	1.28942	2.4006	2.65583		1.21	1.29884	2.43	2.70685		1.19481	2.33083
SJ	1.36	1.32803	2.49	2.77492		1.3	1.33769	2.23	2.78741		1.19	1.3267	2.19	2.77295		1.30741	1.29203	2.41794	2.72368		1.30141	1.33212	2.48619	2.78021		1.22	1.29737	2.4	2.73157		1.21589	2.30901
SJ	1.28	1.24183	2.44	2.66353		1.16	1.24278	2.15	2.66702		1.14	1.24171	2.11	2.66309		1.26023	1.24035	2.39995	2.64997		1.30016	1.24222	2.43301	2.66548		1.14	1.21893	2.39	2.65233		1.14988	2.2935
SJ	1.31	1.25433	2.45	2.67634		1.33	1.26551	2.39	2.66383		1.17	1.25583	2.13	2.67797		1.31012	1.27505	2.46784	2.72618		1.35854	1.27169	2.44063	2.6716		1.19	1.2904	2.47	2.7175		1.19507	2.36823
SJ	1.24	1.24757	2.38	2.5515		1.24	1.24519	2.24	2.5457		1.11	1.2479	2.03	2.55148		1.22767	1.20555	2.37198	2.57803		1.26717	1.24655	2.37245	2.54839		1.16	1.2039	2.31	2.57251		1.14683	2.31374
SJ	1.26	1.23624	2.39	2.60809		1.21	1.22216	2.25	2.58494		1.13	1.23823	2.1	2.61222		1.28165	1.27647	2.45502	2.69913		1.22687	1.23023	2.37416	2.59883		1.23	1.28465	2.37	2.68644		1.20989	2.3001
SJ	1.2	1.17812	2.3	2.48663		1.17	1.18502	2.24	2.46554		1.06	1.17962	1.91	2.4893		1.23881	1.22058	2.36009	2.56946		1.20895	1.17359	2.29191	2.477		1.19	1.21401	2.25	2.55704		1.10957	2.20106
SJ	1.21	1.15471	2.36	2.5748		1.09	1.12943	2.16	2.56839		1.07	1.15589	1.96	2.57572		1.21271	1.18807	2.37025	2.59755		1.19253	1.13432	2.34977	2.57192		1.15	1.18295	2.3	2.59398		1.07304	2.23545
SJ	1.2	1.1723	2.23	2.44339		1.1	1.16799	2.08	2.42809		0.99	1.17289	1.81	2.44527		1.20183	1.18916	2.27578	2.50508		1.1925	1.17047	2.22565	2.43637		1.09	1.18651	2.21	2.49591		1.05631	2.10173
SJ	1.31	1.26879	2.51	2.75096		1.19	1.27228	2.42	2.75575		1.2	1.26831	2.19	2.75018		1.31723	1.29476	2.47341	2.73141		1.32448	1.27026	2.51497	2.75335		1.26	1.27713	2.38	2.73551		1.28218	2.74257
SJ	1.33	1.32157	2.43	2.63869		1.21	1.30014	2.15	2.59864		1.16	1.32458	2.12	2.64384		1.36386	1.36451	2.55942	2.79078		1.31817	1.31242	2.41298	2.62131		1.28	1.35108	2.43	2.76864		1.3376	2.70574
SJ	1.2	1.16418	2.31	2.51404		1.28	1.14875	2.13	2.47715		1.09	1.1665	1.97	2.51941		1.28186	1.25063	2.39631	2.65834		1.21023	1.13792	2.27781	2.49864		1.2	1.2401	2.25	2.63546		1.21375	2.57762
SJ	1.29	1.21549	2.3	2.54301		1.12	1.22372	2.05	2.51785		1.07	1.21724	1.96	2.54662		1.28756	1.18245	2.36574	2.64606		1.2688	1.23092	2.2968	2.53131		1.21	1.19485	2.24	2.63032		1.2156	2.58865
SJ	1.38	1.35979	2.36	2.62367		1.42	1.33352	2.19	2.58319		1.14	1.36347	2.01	2.62913		1.40162	1.40918	2.48846	2.77881		1.34384	1.34861	2.34746	2.60608		1.34	1.41837	2.37	2.75475		1.40549	2.6918
SJ	1.21	1.11824	2.42	2.63157							1.01	1.1179	1.99	2.62944		1.21138	1.18093	2.35169	2.54771		1.22198	1.10571	2.413	2.64144		1.05	1.18234	2.35	2.5602		1.08351	2.57347
SJ	1.21	1.16638	2.32	2.51888		1.06	1.15414	2.19	2.53512		0.99	1.16605	1.93	2.51598		1.19041	1.17402	2.28036	2.46066		1.18925	1.1674	2.32092	2.52525		1.13	1.16035	2.27	2.46787		1.11518	2.34603
SJ	1.17	1.0932	2.33	2.56878		1.17	1.07907	2.26	2.58156		0.98	1.09335	1.91	2.56653		1.18325	1.12426	2.32215	2.52018		1.15927	1.07973	2.34344	2.57347		1.07	1.11032	2.28	2.52748		1.10455	2.5792
SJ	1.13	1.03474	2.33	2.53654		1.04	1.00996	2.11	2.55769		0.97	1.04733	1.87	2.53314		1.19897	1.11679	2.28823	2.47226		1.15649	1.02224	2.31559	2.54507		1.02	1.11617	2.28	2.4805		1.06294	2.24596
SJ	1.07	0.975784	2.34	2.60929		1.15	0.980161	2.34	2.6542		0.98	0.984698	1.95	2.6035		1.0972	1.00235	2.24168	2.45644		1.12647	0.982258	2.37217	2.62772		0.92	0.99749	2.23	2.47562		0.955062	2.23578
SJ	1.12	1.06946	2.4	2.62283		0.88	1.05704	2.46	2.648		1.03	1.06947	1.97	2.61849		1.22	1.11283	2.35	2.52986		1.21	1.05684	2.4	2.63326		1.09	1.09813	2.29	2.54042		1.06933	2.3039
SJ	1.13	0.892641	2.38	2.57223		1.08	0.86972	2.08	2.62405		1.05	0.928756	2.02	2.56625		1.16	1.03459	2.23	2.39567		1.18		2.39	2.59307		0.96	1.04275	2.23	2.42219		1.01642	2.25839
SJ	1.15	0.900838	2.33	2.54451		1.17	0.830142	2.36	2.58136		1.03	0.899734	2.05	2.53893		1.1	1.03326	2.21	2.4007		1.17	0.89482	2.35	2.55993		1.02	1.03758	2.15	2.42372		0.969967	2.21015
SJ	1.1	0.998446	2.32	2.53796		0.87	1.01107	2.07	2.58468		1.05	0.996693	2.04	2.53126		1.1	0.890481	2.2	2.37419		1.14	1.00378	2.34	2.5574		1.02	0.897009	2.15	2.39587		0.955468	2.21281
SJ	1.1	1.04544	2.35	2.60339		1.06	1.05145	2.13	2.65149		1.01	1.04283	1.94	2.59714		1.13	1.0021	2.22	2.44017		1.18	1.05339	2.37	2.62403		1.01	1.01191	2.15	2.46424		1.00721	2.18726
SJ	1.26	1.24147	2.28	2.47925		1.24	1.22508	2.17	2.46141		1.16	1.24382	2.07	2.48187		1.31427	1.25558	2.34489	2.54856		1.25101	1.23442	2.23779	2.47212		1.19	1.2445	2.31	2.53841		1.2172	2.30853
SJ	1.25	1.22228	2.26	2.38656		1.29	1.257	2.21	2.43041		1.12	1.21749	1.95	2.3797		1.18266	1.13812	2.08498	2.21718		1.26454	1.23691	2.25527	2.40454		1.13	1.1582	2.09	2.24362		1.16772	2.1946
SJ	1.28	1.26042	2.26	2.40454		1.21	1.26146	2.06	2.40178		1.16	1.26034	2.03	2.40577		1.21699	1.22651	2.24543	2.41379		1.24154	1.26077	2.20883	2.4042		1.18	1.24366	2.21	2.41208		1.19578	2.23568
SJ	1.26	1.23604	2.14	2.30027		1.27	1.24452	2.11	2.32766		1.09	1.23248	1.82	2.29668		1.175	1.14151	2.04061	2.20014		1.24373	1.24687	2.14704	2.31238		1.12	1.17127	2.01	2.21527		1.16374	2.11099
SJ	1.2	1.17777	2.23	2.39263		1.23	1.18952	2.54	2.4103		1.06	1.17619	1.91	2.39058		1.20765	1.1587	2.1491	2.32857		1.23609	1.18265	2.20105	2.40013		1.13	1.17891	2.14	2.3374		1.16319	2.2101
SJ	1.22	1.28219	2.4	2.66993		1.19	1.31395	2.58	2.72486		1.11	1.2778	2.23	2.66234		1.13823	1.14787	2.18286	2.4624		1.28031	1.29558	2.40511	2.6937		1.08	1.16461	2.16	2.49372		1.07483	2.2712
SJ	1.16	1.14363	2.23	2.47087		1.06	1.15502	2.1	2.50514		0.91	1.14204	1.74	2.46667		1.08223	1.05982	2.10225	2.33608		1.13686	1.14844	2.22076	2.48593		1.01	1.06599	2.08	2.35663		1.02313	2.1568
SJ	1.16	1.05494	2.33	2.56205		1.05	0.999696	2.15	2.6062		1	1.06406	1.91	2.55489		1.11646	1.07166	2.15942	2.38896		1.15064	0.998772	2.329	2.58075		1.05	1.06913	2.1	2.41536		1.01971	2.21179
SJ	1.12	1.12977	2.23	2.4725		1.17	1.15414				1.01	1.12639	1.92	2.46778		1.03232	1.01143	2.07428	2.33563		1.13951	1.14008	2.22734	2.48692		1	1.02515	2.03	2.35559		0.989	2.13786
SJ	0.99	0.922836	2.16	2.36871		1.06	0.927042	1.92	2.38602		0.91	0.92227	1.87	2.36727		0.97051	0.85885	2.0833	2.30734		0.976065	0.924589	2.13805	2.37628		0.92	0.900892	2.05	2.31687		0.865662	2.09624
SJ	1.16	1.14475	2.29	2.5752		0.96	1.14069	2.18	2.5999		1.07	1.14282	2.01	2.57215		1.18534	1.11017	2.2019	2.4801		1.21426	1.13274	2.29081	2.58579		1.05	1.10013	2.16	2.49468		1.12108	2.5329
SJ	1.12	1.11206	2.16	2.41685		1.09	1.12079	1.9	2.43452		0.95	1.11086	1.77	2.41384		1.06586	1.01667	2.07828	2.34872		1.12356	1.11574	2.14559	2.42398		1	1.03627	1.99	2.35894		1.08064	2.38609
SJ	1.1	1.03895	2.18	2.38033		1.1	1.04693	1.96	2.38702		1	1.03784	1.9	2.37995		1.12621	1.02297	2.14398	2.35526		1.13591	1.04232	2.16707	2.38376		1.03	1.02744	2.08	2.3594		1.02541	2.369
SJ	1.09	1.03354	2.25	2.52505		1.12	1.05587	2.09	2.5529		0.93	1.03239	1.81	2.52094		1.09266	0.977072	2.15269	2.41628		1.15046	1.05103	2.25243	2.53631		1.01	0.981066	2.07	2.43262		1.00603	2.47626
SJ	1.1	1.0713	2.23	2.49476		1.13	1.0707	2.18	2.51373		1	1.07141	1.94	2.4919		1.15322	1.05036	2.18396	2.42282		1.15861	1.07099	2.22459	2.50315		1.05	1.04916	2.13	2.4335		1.05915	2.46191
CMJ	1.29	1.18918	2.24	2.46376		1.28	1.20055	2.06	2.50217		1.17	1.18761	2.11	2.45843		1.2536	1.14838	2.12323	2.31759		1.31319	1.19397	2.24091	2.47995		1.17	1.15459	2.08	2.34053		1.19618	2.15176
CMJ	1.23	1.16166	2.21	2.46044		1.23	1.17812	2.09	2.472			1.15938		2.45943				2.17122	2.41535				2.22306	2.46525							1.17568	2.1532
CMJ	1.24	1.2267	2.18	2.40729		1.24	1.2511	2.05	2.42112		0.87	1.2259	1.59	2.40552		1.23619	1.22354	2.15187	2.35504		1.24329	1.24779	2.17614	2.41318		1.17	1.22649	2.09	2.3636		1.17281	2.12634
CMJ	1.2	1.23705	2.16	2.36753		1.08	1.23487	1.91	2.37869		1.08	1.23737	1.93	2.3665		1.21479	1.22937	2.14407	2.32604		1.21618	1.23609	2.1538	2.37177		1.14	1.22751	2.07	2.33265		1.14897	2.10506
CMJ	1.17	1.19685	2.21	2.43392		1.26	1.21676	2.14	2.4647		1.03	1.19409	1.88	2.42959		1.1512	1.13759	2.09696	2.3167		1.21515	1.20525	2.21435	2.44695		1.09	1.14893	2.02	2.33438		1.10508	2.11224
CMJ	1.23	1.27291	2.2	2.43296		1.24	1.27093	2.08	2.43179		1.08	1.27319	1.83	2.43348		1.2913	1.28125	2.24532	2.44193		1.28851	1.27205	2.23359	2.43292		1.2	1.27991	2.18	2.44015		1.27646	2.43597
CMJ	1.29	1.24436	2.18	2.31887		1.26	1.24122	1.87	2.32035		1.18	1.24204	1.99	2.31815		1.24277	1.22319	2.14734	2.31506		1.28371	1.25144	2.17125	2.31944		1.18	1.23247	2.12	2.31548		1.2372	2.31681
CMJ	1.21	1.2262	2.12	2.27323		1.24	1.2164	1.97	2.27032		1.12	1.22473	1.91	2.27391		1.2245	1.20696	2.11154	2.28154		1.23989	1.21022	2.11596	2.2717		1.14	1.21279	2.06	2.28067		1.20846	2.27669
CMJ	1.2	1.18308	2.11	2.25174		1.22	1.2111	2.08	2.27066		1.15	1.1818	1.96	2.24941		1.18554	1.18852	2.0264	2.18252		1.22481	1.18699	2.10663	2.25952		1.1	1.17365	1.99	2.19319		1.1874	2.22069
CMJ	1.23	1.21353	2.08	2.22992		1.2	1.24197	1.9	2.22781		1.23	1.21237	2.01	2.22993		1.21565	1.19977	2.06578	2.2391		1.24651	1.21708	2.07756	2.22887		1.13	1.20458	2.01	2.23732		1.19937	2.23401
CMJ	1.34	1.30297	2.21	2.4463		1.38	1.31997	1.97	2.45352		1.23	1.3006	2.02	2.44455		1.23704	1.26144	2.15192	2.41386		1.29739	1.31016	2.20158	2.44859		1.18	1.27157	2.1	2.41854		1.21163	2.0821
CMJ	1.23	1.23474	2.21	2.41569		1.24	1.25305	2.14	2.42946		1.12	1.21225	1.99	2.4129		1.18823	1.16507	2.13647	2.35971		1.25135	1.24248	2.207	2.42096		1.12	1.15625	2.06	2.36768		1.15641	2.12706
CMJ	1.24	1.26539	2.18	2.38735		1.2	1.28404	1.93	2.40905		1.3	1.2628	2.27	2.38501		1.21759	1.19498	2.09026	2.30587		1.28706	1.27327	2.18972	2.39737		1.13	1.20558	2.03	2.31861		1.17766	2.07187
CMJ	1.27	1.26551	2.19	2.39443		1.26	1.2558	2.05	2.37282		1.19	1.26689	2.09	2.3976		1.26955	1.28569	2.25115	2.48632		1.26864	1.26136	2.17743	2.38464		1.2	1.27903	2.19	2.47077		1.18981	2.13628
CMJ	1.26	1.26351	2.17	2.34075		1.27	1.30156	2.01	2.34939		1.21	1.26153	2.08	2.33866		1.23798	1.20895	2.11853	2.30917		1.28952	1.26956	2.16743	2.34383		1.15	1.21716	2.06	2.31403		1.15912	2.06683
CMJ	1.07	1.1056	1.87	1.98047		1.08	1.08011	1.71	1.95171		1.08	1.10919	1.83	1.98551		1.17448	1.18767	1.96742	2.09506		1.07866	1.09473	1.82855	1.96873		1.1	1.17176	1.95	2.07778		1.11164	1.94392
CMJ	1.11	1.11346	1.88	1.9957		1.14	1.10243	1.84	1.99678		1.09	1.1128	1.84	1.99585		1.08903	1.08287	1.85944	1.99163		1.07725	1.09947	1.83941	1.99629		1.04	1.08503	1.88	1.99203		1.07416	1.91178
CMJ	1.17	1.12002	1.99	2.07698		1.21	1.15699	1.98	2.11652		1.09	1.11713	1.89	2.07154		1.04085	1.06333	1.79694	1.93672		1.14483	1.14421	1.97622	2.09411		1	1.07365	1.86	1.95692		1.08642	1.92887
CMJ	1.02	1.04031	1.79	1.89372		1.03	1.03402	1.77	1.89205		1.01	1.04125	1.7	1.89355		1.04428	1.05822	1.77221	1.89905		1.01622	1.03755	1.75444	1.89284		0.99	1.05282	1.79	1.8983		1.02302	1.82168
CMJ	1.06	1.04346	1.81	1.93484		1.08	1.03971	1.77	1.93347		1.02	1.04401	1.75	1.93494		1.05379	1.06033	1.80837	1.94132		1.01441	1.04185	1.7878	1.93373		1.01	1.05747	1.83	1.9398		1.03659	1.85968
CMJ	1.12	1.09337	1.89	2.00265		1.07	1.08145	1.81	1.99904		1.05	1.09506	1.79	2.00279		1.11661	1.12765	1.88609	2.01785		1.09202	1.08829	1.86577	2.00103		1.06	1.11973	1.88	2.01499		1.08134	1.91168
CMJ	1.04	1.02886	1.82	1.91419		1.05	1.02226	1.79	1.90232		1	1.02985	1.7	1.9154		1.04603	1.07425	1.79436	1.96742		1.04063	1.02596	1.78891	1.90945		0.99	1.06877	1.78	1.9595		1.03975	1.84361
CMJ	1	1.002	1.74	1.82976		1.06	0.994124	1.82	1.81882		0.97	0.990858	1.65	1.83137		0.995609	1.01084	1.76701	1.87148		0.985656	0.998649	1.71199	1.8249		0.95	1.00565	1.76	1.86549		0.988767	1.77399
CMJ	0.99	0.998456	1.84	1.91199		1.06	0.986285	2.01	1.93187		0.97	0.996818	1.75	1.90919		1.00445	1.00822	1.74336	1.83813		0.98702	0.979275	1.81168	1.92009		0.96	1.00109	1.75	1.84802		0.977236	1.80589
CMJ	1.03	1.01193	1.84	1.91449		1.09	1.01505	1.84	1.94533		0.99	1.00976	1.74	1.91015		0.951571	0.977589	1.68429	1.81796		1.0162	1.0188	1.826	1.92731		0.93	0.994159	1.71	1.83078		0.985699	1.80135
CMJ	1.18	1.15627	2.15	2.25058		1.11	1.16763	2.11	2.30305		1.1	1.14981	1.97	2.24324		1.10047	1.07045	1.89254	2.0483		1.207	1.14129	2.11282	2.27286		1.04	1.09761	1.92	2.07899		1.08183	2.01691
CMJ	1.18	1.15869	2.05	2.1806		1.06	1.18147	1.79	2.20883		1.07	1.15788	1.89	2.17667		1.18742	1.15919	1.96621	2.08836		1.16884	1.17804	2.01287	2.19251		1.11	1.16134	1.98	2.10057		1.14976	2.02236
CMJ	1.15	1.15104	1.97	2.08294		1.27	1.13932	2.02	2.09493		1.1	1.14967	1.89	2.08132		1.14787	1.11574	1.90286	2.0365		1.15023	1.13378	1.93607	2.08802		1.09	1.12071	1.93	2.04359		1.07938	1.95918
CMJ	1.16	1.14047	2.02	2.14957		1.01	1.12298	1.74	2.15407		1.12	1.14297	1.95	2.14883		1.18485	1.19684	1.98956	2.13175		1.1094	1.13296	1.96466	2.15151		1.13	1.18519	2	2.13447		1.12104	2.04498
CMJ	1.16	1.15607	2.05	2.18931		1.13	1.15103	1.82	2.19058		1.16	1.15681	1.99	2.18925		1.20819	1.18042	2.03518	2.18759		1.16996	1.15387	2.01104	2.18991		1.14	1.17618	2.03	2.18796		1.12776	2.05611
CMJ	1.14	1.10424	2	2.12184		1.18	1.11281	1.84	2.13263		1.07	1.10306	1.84	2.12026		1.13503	1.09164	1.93905	2.07993		1.13594	1.10785	1.96716	2.12645		1.06	1.09631	1.95	2.08632		1.09171	1.99131
CMJ	1.06	1.04179	1.88	2.01104		1.04	1.02746	1.67	1.95671		1.03	1.0489	1.83	2.01873		1.229	1.18895	2.07568	2.22468		1.05283	1.02045	1.80459	1.98773		1.14	1.15682	2.03	2.19199		1.10373	1.99477
CMJ	1.14	1.12938	1.97	2.08628		1.06	1.14961	1.69	2.10978		1.09	1.12659	1.87	2.08307		1.12481	1.09339	1.85891	1.9966		1.14433	1.13791	1.93	2.09607		1.06	1.105	1.88	2.01026		1.12334	1.93255
CMJ	1.17	1.12494	1.99	2.149		1.16	1.13463	1.81	2.16468		1.06	1.12362	1.87	2.14686		1.15356	1.09175	1.93057	2.08882		1.1491	1.12899	1.95905	2.15571		1.07	1.11689	1.93	2.09798		1.10289	1.97914
CMJ	1.3	1.2431	2.26	2.41741		1.34	1.24017	2.11	2.40767		1.19	1.24353	2.11	2.41789		1.34571	1.28196	2.25407	2.45368		1.32053	1.24184	2.22293	2.4131		1.24	1.27984	2.23	2.44795		1.19877	2.19417
CMJ	1.32	1.2662	2.23	2.34571		1.36	1.27616	2.16	2.35225		1.24	1.26481	2.13	2.34476		1.28728	1.2531	2.17655	2.32012		1.30025	1.2704	2.21375	2.34857		1.25	1.25869	2.16	2.32376		1.22058	2.16554
CMJ	1.31	1.27296	2.22	2.38883		1.34	1.27039	2.04	2.37686		1.2	1.27333	2.07	2.39126		1.29101	1.28474	2.23166	2.43921		1.28532	1.27185	2.1903	2.38362		1.25	1.28269	2.19	2.43159		1.23663	2.18616
CMJ	1.23	1.2043	2.15	2.26348		1.22	1.17311	1.99	2.2177		1.12	1.20868	1.99	2.27024		1.36526	1.28142	2.28382	2.44527		1.25243	1.19104	2.09771	2.24384		1.25	1.26289	2.21	2.41853		1.17779	2.14456
CMJ	1.25	1.22061	2.16	2.29778		1.31	1.22725	2.1	2.29966		1.13	1.2197	2.02	2.29768		1.22422	1.19762	2.11924	2.29062		1.20229	1.22339	2.12544	2.29941		1.23	1.20079	2.1	2.2923		1.16017	2.08021
CMJ	1.29	1.26443	2.28	2.43914		1.27	1.26436	2.03	2.43641		1.2	1.26446	2.13	2.43963		1.34687	1.26635	2.26009	2.44701		1.24128	1.26438	2.23294	2.43808		1.24	1.2656	2.2	2.44526		1.2113	2.16845
CMJ	1.3	1.28988	2.28	2.43935		1.34	1.29435	2.06	2.44645		1.2	1.28928	2.12	2.43865		1.27766	1.27447	2.22671	2.41355		1.27494	1.29176	2.25472	2.44249		1.24	1.27661	2.17	2.41716		1.22912	2.20499
CMJ	1.29	1.26362	2.23	2.38957		1.3	1.27462	2.17	2.40206		1.19	1.26211	2.08	2.3881		1.26214	1.22304	2.16954	2.34039		1.24216	1.26826	2.22082	2.39529		1.21	1.22903	2.12	2.34788		1.1963	2.16054
CMJ	1.31	1.2892	2.26	2.42284		1.34	1.30207	2.13	2.43351		1.24	1.28741	2.07	2.42105		1.30362	1.26524	2.18905	2.3824		1.33279	1.29464	2.2352	2.4274		1.22	1.27267	2.12	2.38853		1.2393	2.14595
CMJ	1.26	1.226	2.14	2.2581		1.24	1.21195	1.98	2.23014		1.18	1.22796	2.03	2.26152		1.30014	1.23541	2.21165	2.3646		1.25059	1.22004	2.10783	2.24557		1.25	1.22711	2.15	2.34849		1.20223	2.10074
CMJ	1.3	1.287	2.23	2.35347		1.35	1.3232	2.24	2.40075		1.24	1.282	2.14	2.34717		1.17597	1.19137	1.9936	2.17189		1.29358	1.30229	2.21245	2.37367		1.14	1.21239	2.02	2.19941		1.20196	2.14874
CMJ	1.23	1.23426	2.19	2.32567		1.22	1.26996	1.87	2.31967		1.2	1.23447	2.14	2.32657		1.21567	1.24165	2.1321	2.34851		1.20976	1.23363	2.12917	2.32309		1.17	1.24038	2.16	2.34552		1.24126	2.28051
CMJ	1.25	1.21511	2.23	2.37588		1.23	1.2275	2.13	2.40155		1.18	1.23167	2.14	2.3727		1.17909	1.18663	2.08741	2.27956		1.23254	1.22032	2.2044	2.38681		1.14	1.19345	2.09	2.29442		1.21778	2.23016
CMJ	1.24	1.2069	2.19	2.34892		1.21	1.21275	2.05	2.36202		1.19	1.20619	2.12	2.34679		1.17524	1.19507	2.08839	2.30332		1.20399	1.20924	2.16975	2.3544		1.14	1.19582	2.1	2.30942		1.18523	2.17266
CMJ	1.22	1.20326	2.14	2.25616		1.16	1.19792	1.9	2.25918		1.15	1.20402	2.05	2.25564		1.20127	1.22569	2.07653	2.24436		1.19094	1.20095	2.09329	2.25735		1.17	1.22186	2.09	2.24635		1.18155	2.11552
CMJ	1.28	1.25921	2.27	2.36704		1.25	1.27881	2.03	2.4004		1.19	1.25651	2.14	2.36334		1.19991	1.20698	2.08133	2.2463		1.25794	1.26744	2.23334	2.38135		1.15	1.21755	2.11	2.26396		1.21104	2.21994
CMJ	1.22	1.18518	2.2	2.32634		1.21	1.17949	1.88	2.29887		1.14	1.1887	2.07	2.33052		1.23171	1.26538	2.23342	2.43539		1.19745	1.17456	2.13847	2.31475		1.19	1.24998	2.22	2.41834		1.21322	2.22534
CMJ	1.2	1.18102	2.17	2.30495		1.22	1.18151	2	2.27558		1.15	1.18361	2.1	2.30926		1.2215	1.23429	2.23083	2.42049		1.22034	1.19207	2.1332	2.29235		1.18	1.22279	2.25	2.40294		1.17545	2.20657
CMJ	1.19	1.17703	2.14	2.26963		1.25	1.17915	1.93	2.24548		1.16	1.17936	2.09	2.27299		1.20617	1.22498	2.17609	2.3643		1.17489	1.17001	2.08931	2.25936		1.14	1.21449	2.12	2.34956		1.19132	2.17562
CMJ	1.19	1.15558	2.03	2.1331		1.28	1.14746	1.96	2.1157		1.14	1.15675	1.98	2.13547		1.14413	1.15537	2.04122	2.20761		1.13367	1.15209	1.98368	2.1256		1.08	1.14977	2.03	2.19539		1.15592	2.04344
CMJ	1.3	1.28811	2.26	2.40137		1.35	1.26139	2.2	2.38626		1.27	1.28886	2.17	2.40356		1.3938	1.31172	2.26961	2.46099		1.24697	1.26434	2.21416	2.395		1.26	1.30778	2.25	2.45154		1.25869	2.26876
CMJ	1.22	1.21362	2.07	2.21206		1.32	1.21143	2.07	2.20999		1.11	1.21394	1.95	2.21236		1.19976	1.20349	2.04936	2.22055		1.17225	1.21268	2.03655	2.2113		1.19	1.20201	2.05	2.21923		1.18449	2.06926
CMJ	1.24	1.21504	2.08	2.19111		1.34	1.21716	2.06	2.17636		1.02	1.21475	1.81	2.19308		1.2473	1.20753	2.10064	2.24831		1.19606	1.21593	2.05467	2.1847		1.17	1.2086	2.11	2.23926		1.19979	2.10469
CMJ	1.16	1.1427	2.06	2.18701		1.15	1.14048	1.8	2.17662		1.15	1.14306	2	2.18854		1.18033	1.15608	2.07947	2.2285		1.11992	1.14171	2.04069	2.18264		1.1	1.15405	2.06	2.22197		1.12425	2.07684
CMJ	1.23	1.20311	2.11	2.23805		1.21	1.22173	1.95	2.23181		1.13	1.20299	1.96	2.23891		1.23505	1.21919	2.10458	2.26332		1.19246	1.22111	2.0787	2.23536		1.18	1.21951	2.11	2.25956		1.18527	2.12187
CMJ	1.33	1.31193	2.34	2.64123		1.28	1.30121	2.07	2.62526		1.28	1.31624	2.34	2.64375		1.37208	1.39277	2.43953	2.70608		1.27945	1.29892	2.33385	2.63486		1.31	1.37391	2.35	2.69709		1.27685	2.34853
CMJ	1.3	1.34292	2.33	2.61099		1.28	1.32317	2.16	2.59546		1.2	1.34572	2.21	2.61265		1.35446	1.37681	2.40932	2.67284		1.29696	1.33448	2.32225	2.60459		1.27	1.36441	2.34	2.6629		1.27843	2.29993
CMJ	1.24	1.29139	2.23	2.51091		1.25	1.24652	2.08	2.49129		1.16	1.29544	2.13	2.51372		1.34885	1.3845	2.34999	2.60046		1.23503	1.27921	2.20117	2.50261		1.28	1.36523	2.3	2.58491		1.236	2.26095
CMJ	1.24	1.31288	2.21	2.49856		1.28	1.30191	2.05	2.48962		1.13	1.31443	2.06	2.4996		1.3036	1.35465	2.2469	2.53473		1.26484	1.30821	2.1909	2.49465		1.24	1.3472	2.2	2.52896		1.21188	2.20293
CMJ	1.34	1.29295	2.3	2.59713		1.24	1.30523	2.23	2.59485		1.17	1.29436	2.03	2.59725		1.32148	1.35615	2.30532	2.60405		1.29844	1.31121	2.29018	2.59616		1.28	1.34968	2.27	2.60397		1.24647	2.28797
CMJ	1.22	1.27594	2.33	2.60226		1.18	1.29129	2.11	2.6142		1.1	1.29529	2.08	2.60073		1.27127	1.27832	2.31591	2.56129		1.25022	1.27375	2.31834	2.60753		1.2	1.29486	2.28	2.56601		1.16638	2.25392
CMJ	1.26	1.28106	2.33	2.65608		1.28	1.30467	2.24	2.67788		1.58	1.28065	2.67	2.6532		1.2858	1.27091	2.27133	2.57578		1.2967	1.28237	2.33911	2.66626		1.22	1.27196	2.23	2.58731		1.24773	2.2764
CMJ	1.27	1.28706	2.35	2.68166		1.3	1.29088	2.2	2.71087		1.22	1.28639	2.25	2.67701		1.26523	1.27225	2.28511	2.56777		1.29241	1.28912	2.3784	2.69472		1.21	1.25349	2.25	2.58465		1.18073	2.31898
CMJ	1.35	1.37057	2.41	2.72083		1.32	1.3845	2.28	2.76544		1.54	1.36862	2.69	2.71529		1.27459	1.29609	2.2587	2.55162		1.32771	1.35414	2.41811	2.73932		1.24	1.32534	2.26	2.57757		1.23427	2.31135
CMJ	1.21	1.18471	2.36	2.64101		1.26	1.19438	2.31	2.66491		1.2	1.1834	2.28	2.63801		1.23245	1.22964	2.25147	2.54932		1.26391	1.18876	2.3499	2.65104		1.17	1.21603	2.24	2.56319		1.17183	2.2844
CMJ	1.31	1.47881	2.55	2.93591		1.48	1.4684	2.64	2.94391		1.39	1.48034	2.48	2.93521		1.50677	1.5028	2.67675	2.90448		1.47355	1.4743	2.69807	2.93921		1.42	1.4956	2.61	2.90913		1.42143	2.63572
CMJ	1.43	1.37729	2.61	2.77511		1.37	1.37045	2.32	2.75067		1.31	1.37832	2.35	2.77885		1.43708	1.39323	2.64715	2.8718		1.40996	1.37428	2.57392	2.76516		1.36	1.38707	2.6	2.85667		1.345	2.58948
CMJ	1.3	1.33087	2.47	2.70625		1.31	1.30116	2.19	2.66059		1.26	1.33773	2.24	2.71196		1.51695	1.46546	2.65642	2.88478		1.37509	1.32944	2.45354	2.68642		1.38	1.4361	2.56	2.85776		1.3274	2.50937
CMJ	1.29	1.39397	2.45	2.8277		1.43	1.42218	2.53	2.86661		1.3	1.39009	2.32	2.82276		1.31918	1.32514	2.41295	2.67984		1.42467	1.40584	2.59762	2.84494		1.26	1.34044	2.4	2.70286		1.30888	2.52704
CMJ	1.45	1.30113	2.69	2.78851		1.31	1.28716	2.33	2.78925		1.25	1.30312	2.32	2.78825		1.37801	1.35943	2.57409	2.78789		1.35487	1.29515	2.54562	2.7886		1.29	1.35002	2.5	2.7877		1.29705	2.49479
CMJ	1.46	1.33009	2.71	2.74656		1.45	1.30829	2.26	2.69035		1.32	1.33603	2.34	2.75369		1.44111	1.45235	2.73174	2.96076		1.34161	1.31207	2.50955	2.72228		1.35	1.4496	2.63	2.92897		1.35292	2.59992
CMJ	1.41	1.36255	2.59	2.76991		1.38	1.347	2.28	2.7673		1.32	1.36248	2.31	2.77075		1.36121	1.3816	2.60034	2.7855		1.33473	1.34641	2.57583	2.76985		1.31	1.38135	2.55	2.78268		1.33558	2.54003
CMJ	1.33	1.32143	2.5	2.66065		1.32	1.30153	2.18	2.63639		1.22	1.32428	2.19	2.66478		1.35377	1.38768	2.53253	2.76926		1.29481	1.31287	2.42146	2.64926		1.3	1.39307	2.49	2.75159		1.33868	2.4959
CMJ	1.39	1.27104	2.61	2.63672		1.32	1.25336	2.16	2.60292		1.19	1.27354	2.19	2.64124		1.35098	1.32335	2.53589	2.76566		1.35385	1.2635	2.4137	2.62285		1.27	1.31218	2.49	2.74616		1.27865	2.48501
CMJ	1.36	1.4711	2.56	2.91503		1.51	1.47061	2.63	2.94557		1.35	1.4685	2.41	2.91044		1.41174	1.40016	2.55591	2.79318		1.49158	1.47907	2.69068	2.92795		1.36	1.41073	2.56	2.81206		1.39198	2.59341
CMJ	1.26	1.27864	2.23	2.43567		1.33	1.29569	2.29	2.43643		1.22	1.27925	2.14	2.43538		1.28079	1.27532	2.23486	2.43398		1.29797	1.29821	2.2439	2.43671		1.23	1.27249	2.19	2.43386		1.20683	2.14065
CMJ	1.28	1.21631	2.27	2.45042		1.3	1.20558	2.19	2.46228		1.15	1.21505	2.03	2.4483		1.24988	1.18396	2.19984	2.40264		1.30709	1.22017	2.26508	2.45496		1.16	1.18842	2.14	2.40947		1.1753	2.15717
CMJ	1.28	1.3047	2.27	2.44971		1.39	1.31817	2.28	2.47775		1.32	1.30285	2.36	2.44529		1.28397	1.27415	2.1725	2.34118		1.33457	1.31038	2.28621	2.46152		1.2	1.28185	2.13	2.35766		1.22478	2.13006
CMJ	1.33	1.33594	2.31	2.52679		1.27	1.31743	2.22	2.55673							1.27865	1.30491	2.21243	2.41236		1.36168	1.34703	2.33933	2.53907		1.17	1.29726	2.17	2.42926		1.20041	2.18481
CMJ	1.37	1.40838	2.29	2.47371		1.49	1.42347	2.42	2.49136		1.37	1.40628	2.46	2.47101		1.30368	1.32474	2.2078	2.40429		1.38913	1.41475	2.29637	2.48079		1.19	1.33293	2.17	2.41381		1.17766	2.16841
CMJ	1.41	1.43126	2.39	2.65432		1.63	1.45591	2.5	2.70324		1.28	1.42784	2.27	2.64755		1.33941	1.3371	2.23801	2.46584		1.44614	1.44168	2.42629	2.6755		1.22	1.3513	2.16	2.49451		1.22931	2.17056
CMJ	1.32	1.32604	2.29	2.45659		1.44	1.3523	2.37	2.47093		1.22	1.32603	2.13	2.45441		1.30926	1.30324	2.23327	2.411		1.35303	1.35216	2.28411	2.46299		1.21	1.30289	2.18	2.41556		1.21718	2.1748
CMJ	1.35	1.30699	2.36	2.55283		1.37	1.35388	2.24	2.60031		1.24	1.30354	2.35	2.54607		1.20523	1.1585	2.16727	2.37416		1.36309	1.31749	2.37417	2.57224		1.14	1.18939	2.12	2.39747		1.19178	2.15126
CMJ	1.3	1.2979	2.24	2.4477		1.26	1.3145	2.03	2.48339		1.1	1.29558	1.9	2.443		1.25216	1.21435	2.12705	2.32044		1.32538	1.30492	2.26174	2.46326		1.15	1.24445	2.06	2.33874		1.19182	2.09899
CMJ	1.36	1.34772	2.21	2.42141		1.4	1.37219	2.21	2.41059		1.17	1.34772	2	2.42338		1.32122	1.34926	2.25551	2.46493		1.33249	1.34778	2.22327	2.41696		1.23	1.34882	2.16	2.45847		1.2178	2.13631
CMJ	1.38	1.38716	2.47	2.70344		1.38	1.37804	2.23	2.68943		1.3	1.38845	2.3	2.70601		1.41861	1.39845	2.51146	2.76166		1.39945	1.38328	2.46419	2.69721		1.32	1.39281	2.48	2.75315		1.34068	2.42825
CMJ	1.43	1.38806	2.56	2.79704		1.48	1.40819	2.39	2.79477		1.32	1.38876	2.31	2.79808		1.46041	1.38777	2.55315	2.81111		1.47452	1.38601	2.54659	2.79633		1.35	1.38309	2.5	2.80813		1.33464	2.489
CMJ	1.4	1.34042	2.55	2.79133		1.41	1.34495	2.39	2.76932		1.33	1.343	2.45	2.79413		1.43032	1.41437	2.60048	2.87425		1.44777	1.33264	2.52873	2.78163		1.34	1.40283	2.53	2.86192		1.38014	2.49926
CMJ	1.4	1.345	2.52	2.72888		1.39	1.34601	2.23	2.74023		1.22	1.34486	2.17	2.72744		1.33132	1.32011	2.4611	2.68452		1.34406	1.3454	2.51062	2.7336		1.28	1.34259	2.4	2.69239		1.30148	2.42281
CMJ	1.38	1.37138	2.54	2.76335		1.5	1.37182	2.27	2.7727		1.28	1.37135	2.26	2.76182		1.35428	1.37253	2.4876	2.72575		1.34639	1.37153	2.52243	2.76685		1.3	1.37207	2.39	2.73026		1.32647	2.4255
CMJ	1.32	1.33612	2.48	2.73253		1.35	1.33722	2.3	2.74112		1.35	1.33599	2.29	2.73112		1.29186	1.31027	2.43914	2.6985		1.31814	1.33656	2.48869	2.7366		1.25	1.31043	2.38	2.70347		1.2965	2.40684
CMJ	1.44	1.36907	2.61	2.85356		1.37	1.35929	2.44	2.87305		1.34	1.36707	2.35	2.85068		1.41798	1.31619	2.49809	2.77789		1.48541	1.37516	2.60641	2.86217		1.31	1.32388	2.44	2.78885		1.33529	2.46086
CMJ	1.44	1.4222	2.6	2.787		1.45	1.43965	2.41	2.76939		1.36	1.42309	2.33	2.78975		1.43253	1.40285	2.60755	2.85342		1.47811	1.41955	2.57384	2.77975		1.37	1.42125	2.55	2.8432		1.37465	2.55432
CMJ	1.4	1.31738	2.43	2.64604		1.39	1.30309	2.21	2.58778		1.3	1.32275	2.17	2.65379		1.40763	1.42602	2.59719	2.87289		1.38216	1.3248	2.39618	2.62108		1.37	1.42471	2.51	2.83851		1.34791	2.4617
CMJ	1.48	1.41091	2.56	2.79463		1.42	1.40881	2.23	2.80327		1.32	1.41123	2.29	2.7929		1.46979	1.42055	2.51931	2.75874		1.4819	1.41	2.56224	2.79796		1.38	1.41898	2.44	2.76387		1.37762	2.4652
CMJ	1.38	1.41115	2.55	2.81437		1.47	1.40625	2.47	2.81611		1.32	1.38721	2.38	2.81456		1.42525	1.40659	2.53177	2.80852		1.43052	1.40906	2.54204	2.81529		1.35	1.40346	2.42	2.80951		1.33176	2.4001
CMJ	1.28	1.29533	2.25	2.51139		1.32	1.31842	2.05	2.5199		1.04	1.29544	1.71	2.51026		1.21966	1.27312	2.22906	2.47818		1.24808	1.31892	2.26319	2.51391		1.21	1.2726	2.12	2.48267		1.16826	2.12572
CMJ	1.36	1.35017	2.36	2.56915		1.35	1.34638	2.1	2.55716		1.24	1.3507	2.16	2.57131		1.35544	1.34143	2.39275	2.61226		1.32772	1.34853	2.34968	2.56428		1.31	1.3388	2.32	2.60477		1.28639	2.29755
CMJ	1.34	1.33593	2.35	2.5572		1.27	1.34501	2.08	2.5302		1.28	1.33848	2.11	2.56107		1.40147	1.35376	2.41653	2.66299		1.3614	1.32823	2.31369	2.54539		1.32	1.37022	2.29	2.64808		1.27489	2.23723
CMJ	1.38	1.34394	2.33	2.5315		1.25	1.33832	2.01	2.514		1.07	1.34473	1.89	2.5343		1.36791	1.33827	2.37363	2.60136		1.35877	1.34155	2.30589	2.52402		1.28	1.33474	2.27	2.59052		1.24617	2.22136
CMJ	1.33	1.33465	2.43	2.67026		1.4	1.3476	2.24	2.69077		1.28	1.33286	2.28	2.66625		1.25048	1.28588	2.33802	2.5868		1.30325	1.34012	2.4274	2.67858		1.24	1.29318	2.22	2.59941		1.26055	2.28459
CMJ	1.47	1.41693	2.49	2.77041		1.37	1.41016	2.21	2.76756		1.26	1.44738	2.23	2.76992		1.45757	1.44503	2.48447	2.78855		1.45283	1.41403	2.47261	2.76899		1.36	1.47142	2.33	2.78411		1.31405	2.37685
CMJ	1.4	1.41265	2.43	2.59884		1.3	1.41528	2.16	2.58767		1.2	1.41248	2.05	2.59979		1.40853	1.38344	2.43853	2.64247		1.40256	1.38867	2.39848	2.59366		1.36	1.38358	2.32	2.63617		1.34024	2.38446
CMJ	1.23	1.26219	2.12	2.26006		1.38	1.27592	2.11	2.2424		1.37	1.2631	2.14	2.26279		1.23804	1.28943	2.15613	2.32673		1.22384	1.25949	2.10058	2.2519		1.25	1.28501	2.01	2.31714		1.22206	2.05578
CMJ	1.42	1.41837	2.4	2.60552		1.44	1.40469	2.29	2.58686		1.31	1.42029	2.24	2.60797		1.45407	1.44439	2.4647	2.67905		1.40411	1.41256	2.37832	2.59773		1.41	1.43594	2.32	2.66809		1.31961	2.34211
CMJ	1.32	1.2719	2.49	2.72609		1.41	1.28527	2.35	2.75611		1.38	1.27006	2.32	2.72175		1.37389	1.22319	2.39137	2.61123		1.42155	1.27752	2.49323	2.73917		1.25	1.23035	2.33	2.62881		1.26929	2.38413
CMJ	1.33	1.34841	2.43	2.64594		1.45	1.36528	2.33	2.68258		1.29	1.34884	2.25	2.63973		1.36363	1.36655	2.33683	2.52087		1.36765	1.34717	2.43107	2.66119		1.29	1.36356	2.31	2.53617		1.27255	2.31431
CMJ	1.26	1.21521	2.41	2.59961		1.39	1.20734	2.31	2.61909		1.25	1.21388	2.25	2.59549		1.34162	1.21852	2.35029	2.53727		1.35511	1.21934	2.3984	2.60756		1.22	1.22343	2.32	2.54509		1.22618	2.33168
CMJ	1.24	1.20276	2.36	2.51804		1.25	1.19486	2.23	2.54858		1.15	1.20164	2.09	2.51499		1.28428	1.20316	2.26529	2.41644		1.29561	1.18999	2.34669	2.53002		1.19	1.20732	2.26	2.43054		1.1694	2.27647
CMJ	1.25	1.18859	2.3	2.53732		1.25	1.18889	2.04	2.57637		1.27	1.18857	2.22	2.53155		1.29646	1.18969	2.21344	2.39718		1.31031	1.18869	2.31626	2.55414		1.22	1.18931	2.19	2.41557		1.17421	2.23445
CMJ	1.34	1.23378	2.51	2.68349		1.28	1.25811	2.15	2.73618		1.26	1.23043	2.22	2.67696		1.30798	1.1943	2.30502	2.48335		1.38257	1.24403	2.50513	2.70637		1.18	1.20829	2.25	2.51398		1.21876	2.37318
CMJ	1.25	1.19218	2.4	2.61428		1.23	1.19638	2.1	2.64423		1.32	1.19163	2.34	2.61017		1.31162	1.20074	2.31966	2.50084		1.33037	1.19391	2.39802	2.62737		1.22	1.20158	2.27	2.51905		1.21177	2.32032
CMJ	1.18	1.16143	2.36	2.55618		1.2	1.16509	2.18	2.57405		1.36	1.16094	2.43	2.55351		1.28652	1.16447	2.29693	2.48673		1.28106	1.16296	2.36144	2.56383		1.15	1.1662	2.23	2.49701		1.17485	2.30331
CMJ	1.28	1.20322	2.43	2.63024		1.24	1.21663	2.11	2.67336		1.13	1.20135	2.21	2.62429		1.2578	1.13487	2.26639	2.46087		1.33262	1.20888	2.42656	2.64906		1.17	1.14215	2.14	2.48726		1.17626	2.27225
CMJ	1.25	1.19245	2.41	2.61345		1.28	1.19129	2.18	2.63551		1.08	1.19263	1.94	2.6098		1.33267	1.19967	2.34181	2.52395		1.32936	1.19192	2.41555	2.62315		1.2	1.19835	2.27	2.53775		1.20387	2.34545
CMJ	1.36	1.40416	2.4	2.52005		1.39	1.40472	2.25	2.54751		1.35	1.40169	2.2	2.51627		1.3763	1.35453	2.28296	2.41317		1.42338	1.41172	2.37334	2.53205		1.33	1.36463	2.3	2.43004		1.34936	2.32086
CMJ	1.32	1.29652	2.17	2.30249		1.21	1.28234	2.07	2.30165		1.3	1.28153	2.02	2.30168		1.3962	1.37834	2.19272	2.31133		1.33779	1.29038	2.12491	2.30125		1.31	1.38715	2.17	2.30773		1.32292	2.18602
CMJ	1.35	1.35736	2.28	2.43095		1.3	1.36393	1.99	2.43028		1.29	1.35649	2.11	2.43113		1.3251	1.31767	2.2622	2.43362		1.33716	1.36006	2.251	2.4307		1.26	1.33925	2.25	2.43303		1.26854	2.27201
CMJ	1.33	1.29268	2.22	2.38787		1.3	1.30459	2.03	2.41253		1.27	1.2911	2.02	2.38496		1.29762	1.28753	2.13417	2.29533		1.36426	1.29759	2.20658	2.39882		1.25	1.29322	2.17	2.30861		1.30637	2.23797
CMJ	1.3	1.31421	2.16	2.34869		1.42	1.31857	2.01	2.36433		1.27	1.31362	2	2.34662		1.25175	1.26438	2.08555	2.29386		1.27734	1.31603	2.0989	2.35496		1.21	1.26625	2.12	2.30245		1.28713	2.1802
CMJ	1.36	1.26824	2.25	2.36817		1.37	1.2773	2.21	2.40797		1.2	1.2643	1.95	2.36303		1.23365	1.12993	2.08105	2.21496		1.34978	1.28032	2.2295	2.3843		1.17	1.16118	2.11	2.23868		1.2192	2.13617
CMJ	1.34	1.31672	2.12	2.21935		1.38	1.32472	1.97	2.23356		1.28	1.31563	1.89	2.21923		1.31077	1.28903	2.06617	2.17636		1.36836	1.32006	2.10573	2.22563		1.26	1.29287	2.11	2.18254		1.3006	2.10041
CMJ	1.33	1.24409	2.14	2.31645		1.29	1.25551	2.21	2.32958		1.26	1.24252	1.92	2.31428		1.27874	1.20211	2.08872	2.26556		1.31227	1.2489	2.10794	2.32136		1.2	1.20822	2.11	2.27353		1.24274	2.11176
CMJ	1.25	1.23603	2.11	2.24159		1.34	1.2265	2.22	2.22777		1.21	1.23745	1.85	2.24371		1.32189	1.26485	2.15555	2.30412		1.29465	1.23185	2.07016	2.23473		1.23	1.257	2.17	2.29367		1.25219	2.11986
CMJ	1.35	1.3888	2.26	2.42267		1.42	1.40311	2.15	2.44385		1.27	1.40777	1.93	2.41945		1.31572	1.22825	2.15206	2.34187		1.36017	1.39477	2.24503	2.43077		1.21	1.23186	2.21	2.35371		1.25966	2.22814
CMJ	1.26		2.31	2.545				2.2	2.54614		1.41	1.2221	2.47	2.54494		1.30864	1.2307	2.28634	2.53978		1.33703	1.22098	2.27491	2.54576		1.17	1.22922	2.23	2.54032		1.22553	2.5431
CMJ
CMJ	1.29	1.20944	2.35	2.59253		1.33	1.21691	2.36	2.61408		1.32	1.20843	2.31	2.58985		1.34797	1.22421	2.29588	2.51207		1.35673	1.21258	2.34322	2.60148		1.24	1.20737	2.22	2.52352		1.21719	2.55728
CMJ	1.35	1.30723	2.34	2.58571		1.29	1.31234	2.17	2.60354		1.31	1.30651	2.33	2.58391		1.28763	1.28761	2.29621	2.52039		1.2964	1.30939	2.32872	2.59341		1.22	1.29058	2.17	2.53131		1.29844	2.55627
CMJ	1.13	1.10372	2.04	2.23921		1.07	1.08641	1.84	2.2187		1.12	1.10615	2.04	2.24232		1.16707	1.15418	2.11108	2.32031		1.10392	1.09635	2.00568	2.23047		1.11	1.14368	1.99	2.30794		1.11632	2.27595
CMJ	1.27	1.21109	2.3	2.55408		1.29	1.22103	2.16	2.56731		1.07	1.2097	1.96	2.55259		1.28588	1.1934	2.25182	2.50496		1.26094	1.21529	2.28431	2.55921		1.18	1.1991	2.21	2.51238		1.19418	2.53213
CMJ	1.28	1.24543	2.42	2.69495		1.28	1.24316	2.23	2.72422		1.28	1.243	2.23	2.6916		1.33664	1.19862	2.32201	2.58378		1.37049	1.25283	2.41077	2.70757		1.21	1.18905	2.3	2.60141		1.21559	2.64605
CMJ	1.23	1.18863	2.34	2.56067		1.29	1.20076	2.21	2.58562		1.11	1.18696	1.99	2.55781		1.29348	1.14479	2.25274	2.46416		1.32952	1.19374	2.33534	2.57124		1.18	1.15106	2.26	2.47944		1.16838	2.51767
CMJ	1.19	1.09212	2.22	2.48471		1.16	1.20602	2.15	2.47746		1.13	1.09369	2.07	2.48617		1.26269	1.13888	2.27234	2.51363		1.21409	1.08737	2.21249	2.48154		1.13	1.13142	2.25	2.5091		1.11227	2.49761
CMJ	1.17	1.23056	2.29	2.56078		1.21	1.23252	2.03	2.57029		1.12	1.23327	2.07	2.55937		1.28956	1.13955	2.28429	2.52493		1.23628	1.22242	2.27497	2.56402		1.16	1.12779	2.15	2.52992		1.2416	2.54506
hang power snatch	1.6	1.68559	3.05	3.13504												1.10881	1.62348	2.86522	3.01393		1.1724	1.69306	2.99822	3.14832		1.47	1.6333	2.97	3.03224		1.67577	3.08103
hang power snatch	1.53	1.59154	3.08	3.14365		1.14	1.60204	2.93	3.17883							1.19399	1.26436	2.88866	3.00752		1.44921	1.59617	3.02456	3.15857		1.29	1.3016	2.93	3.02806		1.52404	3.08281
hang power snatch	1.51	1.56546	3.05	3.11972		1.2	1.56942	2.96	3.14211							1.41172	1.56053	2.91005	3.0364		1.45988	1.5671	3.0013	3.12918		1.45	1.54396	2.96	3.04885		1.54555	3.08168
hang power snatch	1.42	1.47328	3	3.06299		1.24	1.49122	2.9	3.0848							1.34636	1.48138	2.86744	2.97876		1.36455	1.48975	2.95511	3.07217		1.36	1.48245	2.94	2.9916		1.4697	3.02545
hang power snatch	1.68	1.7323	3.08	3.12929		1.09	1.758	2.95	3.16072							1.39501	1.50352	2.90653	3.00876		1.28136	1.7358	3.02605	3.14258		1.37	1.49257	2.99	3.02621		1.70702	3.07489
hang power snatch	1.89	1.97695	3.21	3.27747			1.96263		3.27153		1.7	1.97785	2.7	3.27821		1.51077	1.92301	3.16898	3.302		1.84252	1.97426	3.14536	3.27489		1.53	1.91688	3.27	3.29828		1.92056	3.28819
hang power snatch	1.92	1.96331	3.22	3.28744		1.68	1.93648	3.01	3.2867		1.73	1.96347	2.74	3.28751		1.92951	2.06069	3.15976	3.29124		1.81822	1.96286	3.14334	3.28706		1.99	2.03031	3.21	3.29056		2.02053	3.28887
hang power snatch	2.21	2.26264	3.5	3.56107		1.94	2.23762	3.94	3.57925		1.98	2.26165	3.05	3.55857		2.08655	2.18963	3.38223	3.49204		2.05014	2.26576	3.44855	3.5688		2.1	2.22001	3.52	3.50195		2.22416	3.52984
hang power snatch	2.08	2.16525	3.42	3.48804		1.87	1.93611	3.76	3.4843		2.01	2.16692	3.06	3.48855		2.05214	2.22191	3.3558	3.50525		1.85546	2.16021	3.33781	3.48639		2.11	2.21372	3.46	3.50221		2.19271	3.49509
hang power snatch	2.06	2.0969	3.37	3.43787		1.56	2.02362	3.32	3.45792		1.92	2.12489	2.98	3.43501		2.01183	2.09822	3.23937	3.3605		1.81174	2.07197	3.31219	3.44639		2.08	2.12481	3.3	3.37224		2.12273	3.40334
hang power snatch	2.09	2.1605	3.36	3.39138		1.39	2.19064	3.35	3.4106		1.88	2.15962	2.92	3.38861			2.05387	3.2152	3.32567				3.2911	3.39945		2.05	2.07735	3.28	3.3353		2.12824	3.36102
hang power snatch	2.01	2.16209	3.39	3.45937			2.14585		3.43906		1.84	2.16438	2.84	3.46217		2.05441	2.27624	3.37505	3.53847		1.90372	2.15517	3.28777	3.45082		2.11	2.2658	3.49	3.52636		2.21493	3.4944
hang power snatch	2.02	2.14844	3.35	3.42229		1.46	2.14243	3.6	3.43372		1.96	2.14847	3.04	3.42069		2.00745	2.18256	3.26988	3.39046		1.94071	2.14226	3.28334	3.42708		2.1	2.18126	3.34	3.39493		2.14943	3.40686
hang power snatch	2.04	2.08009	3.29	3.34384		1.26	2.07261	3.24	3.33757		1.78	2.08115	2.82	3.34476		1.94985	2.11084	3.26128	3.37085		1.91242	2.07689	3.22097	3.34124		2.02	2.10593	3.31	3.36662		2.09338	3.35518
hang power snatch	2.03	2.16669	3.35	3.39991		1.66	2.17018	3.27	3.40219		1.95	2.1663	2.98	3.39961		1.96389	2.17094	3.27572	3.39638		1.88831	2.16803	3.28294	3.40091		2.08	2.17058	3.35	3.3957		2.14237	3.39623
hang power snatch	2.21	2.28236	3.45	3.48067		1.59	2.28103	3.09	3.48728		2.17	2.28259	3.24	3.47971		2.06789	2.30165	3.36226	3.46151		1.98659	2.28173	3.37358	3.48343		2.23	2.2995	3.42	3.46374		2.26248	3.4701
hang power snatch	2.02	2.0665	3.27	3.34652		1.75	1.9946	3.08	3.27905		1.93	2.07253	3.06	3.35585		2.09372	2.30272	3.48724	3.60791		1.88303	2.04831	3.19465	3.31786		2.23	2.24315	3.51	3.56813		2.17282	3.46289
hang power snatch	1.31	1.38894	2.56	2.64055							1.23	1.38701	2.18	2.63704		1.02	1.34256	2.44	2.55821		1.03	1.37849	2.51	2.65136		0.97	1.34977	2.57	2.56886		1.36573	2.59992
hang power snatch	1.53	1.58734	2.54	2.61508							1.28	1.58485	2.14	2.61134		1.12	1.4674	2.42	2.51301		1.42	1.59494	2.5	2.62649		1.06	1.50416	2.5	2.52826		1.54408	2.56921
hang power snatch	1.5	1.58142	2.61	2.66119							1.34	1.5778	2.19	2.65484		1.2	1.30084	2.41	2.49028		1.19	1.59246	2.57	2.6803		1.12	1.30075	2.51	2.51579		1.53699	2.5841
hang power snatch			2.59	2.63998														2.42	2.49718				2.56	2.65679				2.53	2.5181			2.57464
hang power snatch	1.56	1.69689	2.7	2.78351							1.41	1.69077	2.21	2.77516		1.13	1.4959	2.47	2.55121		1.14	1.73028	2.7	2.80896		1.09	1.51966	2.55	2.58661		1.56473	2.67997
hang power snatch	1.56	1.71709	2.93	2.96983		1.29	1.73787	2.8	2.98669		1.41	1.71608	2.34	2.9675		1.21778	1.6805	2.841	2.90689		1.53373	1.73348	2.90818	2.97697		1.43	1.69755	2.94	2.91625		1.72079	2.9413
hang power snatch	1.46	1.49139	2.87	2.90896		1.43	1.47774	2.72	2.8806		1.43	1.49172	2.3	2.91288		1.58729	1.66654	2.93403	3.01982		1.39808	1.47848	2.82371	2.89689		1.47	1.62983	3.01	3.0028		1.56111	2.95801
hang power snatch	1.63	1.73497	2.97	2.9942		1.53	1.68826	2.94	2.97968		1.53	1.73526	2.39	2.99636		1.63948	1.83445	2.98479	3.05314		1.31012	1.70429	2.92341	2.98788		1.59	1.83087	3.06	3.04415		1.77297	3.02046
hang power snatch	1.49	1.62858	2.87	2.89444		1.35	1.57942	2.68	2.86389		1.41	1.64498	2.26	2.89868		1.59416	1.75475	2.95088	3.01484		1.27869	1.61135	2.81465	2.88148		1.52	1.749	3.01	2.99615		1.70142	2.94699
hang power snatch	1.58	1.64975	2.87	2.91967		1.74	1.64384	2.73	2.91731		1.49	1.64856	2.29	2.91993		1.52169	1.66547	2.84701	2.92856		1.37034	1.6387	2.83207	2.91861		1.5	1.66923	2.93	2.92717		1.65053	2.92356
hang power snatch	1.29	1.34131	2.15	2.20489		1.15	1.32187	1.93	2.15818		1.16	1.34594	1.79	2.2114		0.910601	1.39952	2.29482	2.3859		1.23013	1.34101	2.09612	2.18513		1.37	1.39407	2.31	2.35828		1.3705	2.28544
hang power snatch	1.37	1.37601	2.22	2.28279		1.06	1.37309	2.22	2.25301		1.16	1.37887	1.84	2.28692		1.33865	1.41093	2.28867	2.39934		1.30711	1.36735	2.17149	2.27013		1.38	1.39761	2.28	2.38141		1.3955	2.33436
hang power snatch	1.2	1.26408	2.17	2.22778		1.09	1.25999	2.29	2.17715		1.09	1.28457	1.82	2.23496		0.216132		0.290349			1.13749	1.26427	2.10967	2.20634		0.7	0.751143	2.34	2.39469		1.29367	2.31537
hang power snatch	1.2	1.24474	2.04	2.08472		1.04	1.21783	1.95	2.03563		1.04	1.24853	1.69	2.09158		0.712358	1.31792	2.30958	2.27589		1.14834	1.23328	1.97822	2.06387		1.26	1.3147	2.21	2.24669		1.28357	2.16962
hang power snatch
hang power snatch	1.12	1.20491	2.02	2.06088		0.84	1.20114	1.92	2.01388		0.98	1.20893	1.66	2.06751		0.67518	1.15992	2.14597	2.2507		1.10047	1.20494	1.96896	2.04085		0.66	1.13923	2.2	2.22106		1.23605	2.14393
hang power snatch	1.55	1.62515	2.8	2.82803												1.65268	1.74954	2.84315	2.96029		1.5006	1.61467	2.70933	2.81411		1.54	1.73133	2.92	2.93961		1.68582	2.88582
hang power snatch	1.56	1.67437	2.85	2.88512							1.31	1.67649	2.32	2.88807		1.63959	1.77722	2.87157	2.97114		1.00288	1.6362	2.76869	2.87624		1.51	1.76537	2.92	2.95741		1.71914	2.92226
hang power snatch	1.57	1.63319	2.83	2.84825							1.28	1.89345	2.27	2.85276		1.70404	1.76171	2.87583	2.97071		1.21655	1.88231	2.73129	2.8351		1.59	1.75078	2.93	2.95194		1.6893	2.9025
hang power snatch
hang power snatch	1.59	1.682	2.83	2.85497							1.32	1.683	2.36	2.85779		1.67062	1.75415	2.82791	2.93501		1.59207	1.67911	2.732	2.84625		1.57	1.72884	2.91	2.92266		1.7139	2.89031
hang power snatch	1.61	1.64117	2.83	2.85716							1.24	1.64102	2.26	2.86069		1.64911	1.68084	2.8479	2.95228		1.58012	1.64167	2.73233	2.84682		1.52	1.69592	2.93	2.93768		1.65797	2.89948
hang power snatch	1.73	1.88672	2.93	2.96143		1.64	1.87877	2.89	2.94108							1.82365	1.92628	2.95495	3.04093		1.73384	1.88323	2.86831	2.95281		1.68	1.91934	3.03	3.0287		1.9026	2.99675
hang power snatch	1.67	1.72019	2.92	2.94627		1.5	1.7019	2.97	2.92111		1.37	1.72282	2.43	2.94971		1.77023	1.80003	2.94017	3.04394		1.60618	1.71232	2.83252	2.93547		1.64	1.78691	3.02	3.02903		1.75396	2.98973
hang power snatch	1.59	1.55637	2.7	2.73183		1.57	1.54641	2.74	2.71479		1.33	1.55779	2.21	2.73421		1.64324	1.63308	2.68674	2.7978		1.54525	1.5521	2.61533	2.7245		1.54	1.6259	2.76	2.78774		1.591	2.76118
hang power snatch	1.78	1.7865	2.87	2.90754		1.63	1.77373	2.93	2.90266		1.41	1.78569	2.38	2.90825		1.75494	1.80984	2.82421	2.92784		1.73604	1.78904	2.79818	2.90548		1.65	1.79154	2.93	2.92475		1.79707	2.91646
hang power snatch	1.76	1.78458	2.87	2.90295							1.37	1.78612	2.35	2.90482		1.75035	1.80213	2.85644	2.95598		1.70661	1.77996	2.79684	2.8973		1.7	1.79454	2.93	2.94786		1.8046	2.92636
hang power snatch	1.32		2.76	2.78308									2.32	2.78677		1.55695	1.57525	2.77569	2.88525		0.803595	0.983183	2.65228	2.77196		1.44	1.53701	2.86	2.86958		0.980454	2.82843
hang power snatch
hang power snatch
hang power snatch	1.27	1.31598	2.04	2.08961		1.3	1.31785	2.5	2.08758		1.14	1.31573	1.85	2.08995		1.19535	1.3028	2.02485	2.10007		1.18799	1.31674	2.00689	2.08876		1.17	1.30326	2.08	2.09825		1.32368	2.09386
hang power snatch	1.18	1.22127	1.9	1.94881		1.07	1.22702	2.05	1.94279		1.05	1.22157	1.67	1.94972		1.12125	1.24065	1.90433	1.97504		1.08532	1.22803	1.87502	1.94624		1.1	1.23883	1.91	1.9708		1.22524	1.95996
hang power snatch
hang power snatch
hang power snatch	1.25	1.30203	2.46	2.48318		1.11	1.27875	2.38	2.43325		0.95	1.30698	1.9	2.49022		1.29225	1.43059	2.60003	2.68195		1.15197	1.29903	2.38159	2.46206		1.24	1.40865	2.66	2.6514		1.36409	2.5711
hang power snatch	1.31	1.38678	2.62	2.65919		1.21	1.3967	2.73	2.63203		1.19	1.38901	2.38	2.663		1.3103	1.61379	2.6903	2.76764		0.977526	1.39406	2.56941	2.6476		1.41	1.6023	2.74	2.7508		1.41573	2.70689
hang power snatch	1.17	1.2374	2.63	2.64788			1.22041	2.59	2.60102		1.14	1.23847	2.24	2.65436		1.40246	1.50494	2.75942	2.82955		1.15922	1.23455	2.55638	2.62807		1.32	1.47605	2.8	2.80188		1.37757	2.72874
hang power snatch	1.28	1.28728	2.65	2.6692		1.24	1.36267	2.46	2.63884		1.15	1.29015	2.33	2.67344		0.933232	1.33574	2.69551	2.79068		0.96789	1.29172	2.57111	2.65632		1.17	1.3344	2.77	2.77179		1.27368	2.7225
hang power snatch	1.37	1.44466	2.64	2.67168		1.2	1.41719	2.62	2.64495		1.12	1.4467	2.25	2.67539		1.34618	1.54195	2.68018	2.77736		1.33713	1.43857	2.5782	2.66034		1.36	1.51931	2.74	2.76099		1.4974	2.71804
hang power snatch			2.64	2.67134		1.08	1.18314	2.58	2.62887				2.45	2.67732		1.20211	1.62255	2.75805	2.83995		1.12256	1.19452	2.5726	2.65333				2.8	2.81396		1.22127	2.74565
hang power snatch	1.93	1.9589	2.98	3.02355		1.66	1.94968	3.08	3.02521		1.87	1.96023	2.71	3.02335		1.8082	1.99913	2.92454	3.02578		1.75964	1.95493	2.92371	3.02421		1.87	2.00788	2.99	3.02449		1.96223	3.02229
hang power snatch	2.04	2.07332	3.16	3.19864		1.78	2.12923	3.16	3.24571		1.93	2.07038	2.75	3.19336		1.75328	1.93868	2.95277	3.06318		1.90935	2.11642	3.13168	3.2179		1.82	1.949	3.06	3.08339		2.02356	3.13714
hang power snatch	1.95	2.10236	3.15	3.17763		1.77	2.1509	3.29	3.18744		1.85	2.10235	2.64	3.17619		1.85933	2.03213	3.00156	3.14174		1.89759	2.13591	3.07714	3.18178		1.9	2.04591	3.1	3.14692		2.07266	3.16107
hang power snatch	1.96	2.0039	3.11	3.14791		1.69	2.008	3.35	3.15269		1.88	2.00552	2.72	3.14738		1.84469	2.02225	3.02959	3.13753		1.84108	1.99909	3.03152	3.15004		1.96	2.01358	3.06	3.13806		2.00906	3.14033
hang power snatch	1.94	1.99612	2.95	3.01474		1.64	1.97886	2.91	2.95714		1.76	2.00269	2.54	3.02276		1.95413	2.18095	3.12002	3.25928		1.80389	1.97623	2.85763	2.99025		2.08	2.15247	3.11	3.21718		2.07778	3.11471
hang power snatch	2.03	1.91764	3.07	3.07772		1.49	1.89727	2.95	3.09167							1.86222	1.98412	2.97455	3.10514		1.88384	1.91556	3.00533	3.08361		1.93	1.97968	3.06	3.09635		1.98384	3.07689
hang power snatch	2.1	2.0412	3.15	3.16137		1.79	2.07213	3.03	3.16803		1.9	2.04348	2.84	3.16131		1.94181	2.06523	3.07448	3.1663		1.94733	2.03439	3.08739	3.16207		2.09	2.05391	3.08	3.16286		2.07066	3.16076
hang power snatch	1.93	1.94876	3.09	3.10279		1.63	1.94807	2.93	3.11106		1.77	1.93222	2.77	3.10167		1.85475	1.94604	2.99254	3.07065		1.86882	1.94838	3.03588	3.10632		1.97	1.94442	2.99	3.07554		1.93379	3.08839
hang power snatch	2.08	2.04961	3.19	3.21993		1.62	2.04982	3.37	3.22925		1.88	2.04962	2.9	3.21874		1.91855	2.03345	3.08208	3.19431		1.95583	2.04963	3.11259	3.22394		2.08	2.03259	3.1	3.19703		2.05054	3.20486
hang power snatch	2.07	2.03579	3.15	3.18761		1.79	2.02013	3.21	3.18342		1.83	2.038	2.86	3.18856		1.92814	2.04604	3.09643	3.21422		1.91088	2.02912	3.09041	3.18505		2.08	2.06663	3.11	3.20994		2.0635	3.19886
hang power snatch	1.95	1.98758	3.04	3.09413		1.8	1.99426	3.38	3.11896		1.75	1.98671	2.77	3.09072		1.83	1.95067	2.87	3.03818		1.89	1.99032	2.98	3.10455		1.9	1.95301	2.93	3.04084		1.96039	3.05321
hang power snatch																1.62023	1.71953	2.70212	2.75512		1.63307	1.73613	2.65994	2.71409							1.71613	2.73392
hang power snatch	1.55	1.6044	2.57	2.62234							1.24	1.60568	1.95	2.62532		1.48415	1.57863	2.64337	2.71968		1.45163	1.61428	2.54406	2.61359		1.52	1.58489	2.72	2.70255		1.59412	2.65972
hang power snatch	1.67	1.75795	2.73	2.75947		1.67	1.74745	2.51	2.74489		1.27	1.75951	2.26	2.76144		1.61716	1.77365	2.78016	2.85675		1.60317	1.75337	2.69614	2.75325		1.68	1.7651	2.86	2.83946		1.76182	2.79462
hang power snatch	1.73	1.79651	2.84	2.8918		1.36	1.8035	2.75	2.89532		1.33	1.79559	2.39	2.8913		1.67608	1.75936	2.82422	2.88455		1.6893	1.79939	2.83006	2.89313		1.69	1.7618	2.92	2.88491		1.76965	2.88718
hang power snatch	1.76	1.81849	2.74	2.81719		1.66	1.82211	2.73	2.81922		1.43	1.81808	2.42	2.81695		1.65762	1.7324	2.74513	2.80971		1.6578	1.81988	2.74791	2.81803		1.68	1.74812	2.82	2.8108		1.79864	2.81391
hang power snatch	1.86	1.89897	2.76	2.81571		1.64	1.87385	2.7	2.80204		1.43	1.8996	2.3	2.81763		1.76704	1.8974	2.80723	2.86891		1.74051	1.87621	2.75076	2.80992		1.8	1.91546	2.89	2.86079		1.90718	2.8393
hang power snatch	1.65	1.73655	2.66	2.72132		1.63	1.77057	2.85	2.71436		1.28	1.73642	2.27	2.72232		1.57403	1.69352	2.69691	2.76733		1.59652	1.76975	2.66465	2.71832		1.61	1.70711	2.76	2.75804		1.73662	2.73378
hang power snatch																1.74372	1.83369	2.85038	2.90152		1.70691	1.82096	2.76716	2.8188		1.59	1.82598	2.87	2.88977		1.82708	2.85977
hang power snatch	1.77	1.82203	2.72	2.76815		1.64	1.8398	2.58	2.77695		1.45	1.82205	2.36	2.76692		1.70904	1.74249	2.69339	2.74439		1.73199	1.82208	2.71732	2.77184		1.6	1.75754	2.73	2.74344		1.78867	2.75315
hang power snatch	1.82	1.88577	2.73	2.77575		1.74	1.88965	2.65	2.7743		1.48	1.88527	2.37	2.77603		1.72289	1.85625	2.74194	2.80021		1.73515	1.88735	2.71385	2.77511		1.68	1.85715	2.77	2.79537		1.86072	2.78307
hang power snatch	1.7	1.74976	2.63	2.6884		1.58	1.74172	2.6	2.67089		1.35	1.75089	2.22	2.69081		1.63955	1.74694	2.70575	2.77267		1.62661	1.74633	2.61641	2.68094		1.55	1.76002	2.67	2.75756		1.764	2.72049
hang power snatch	1.58	1.64528	2.51	2.58803		1.52	1.63411	2.56	2.55524		1.29	1.64689	2.15	2.59256		1.59804	1.69458	2.65571	2.71525		1.53064	1.64048	2.5074	2.57422		1.53	1.68645	2.62	2.69584		1.66602	2.64462
hang power snatch	1.67	1.74767	2.61	2.66869		1.42	1.7369	2.56	2.65522		1.33	1.74674	2.25	2.67054		1.60226	1.71167	2.66901	2.72326		1.59177	1.75058	2.5979	2.66295		1.59	1.71382	2.67	2.71464		1.72104	2.69248
hang power snatch	1.63	1.77623	2.84	2.87981		1.29	1.73542	2.69	2.895							1.23225	1.8135	2.8415	2.88784		1.46084	1.75077	2.83133	2.88558		1.46	1.82813	2.75	2.87787		1.8389	2.86381
hang power snatch	1.27	1.37511	2.4	2.46386		1.18	1.32908	2.16	2.43316		1.13	1.36897	2.12	2.46857		1.27186	1.49933	2.51169	2.59761		0.827125	1.36176	2.34508	2.45088		1.22	1.49161	2.52	2.57703		1.43528	2.52292
hang power snatch			2.33	2.37929				2.32	2.37991				2.06	2.37916			¨	2.31111	2.37847			¨	2.30571	2.37953				2.33	2.37842			2.37855
hang power snatch			2.12	2.18795				1.96	2.18324				1.86	2.18853			¨	2.13027	2.20976			¨	2.10885	2.18599				2.12	2.20602			2.19699
hang power snatch			2.35	2.43635				2.21	2.44405				2.08	2.43537			¨	2.32375	2.43626			¨	2.3352	2.43952				2.31	2.43524			2.4339
hang power snatch			2.49	2.56073									2.21	2.55738			¨	2.37339	2.46866			¨	2.45868	2.57087				2.44	2.48258			2.51962
hang power snatch
hang power snatch
hang power snatch
hang power snatch	1.19	1.17387	2.43	2.52677		1.31	1.16942	2.23	2.54542		1.11	1.17334	2.12	2.52413		1.14742	1.24801	2.36894	2.45929		1.03432	1.17561	2.43434	2.53461		1.1	1.23695	2.3	2.46901		1.20709	2.49573
hang power snatch	1.07	1.21314	2.69	2.77119		1.05	1.22503	2.59	2.78486		1.11	1.21221	2.38	2.76939		1.10891	1.31426	2.61602	2.72111		0.900542	1.21367	2.65801	2.77695		1.12	1.31478	2.61	2.7285		1.3398	2.74836
hang power snatch	1.33	1.51173	2.4	2.51833		1.35	1.57446	2.91	2.5605		1.2	1.50874	2.11	2.51244		0.911363	1.13866	2.26014	2.36258		1.02385	1.5315	2.41391	2.53622		1.13	1.14879	2.21	2.38569		1.45493	2.44734
hang power snatch			2.89	2.9849				2.75	2.99683				2.26	2.98332				2.85687	2.9468				2.88162	2.98986				2.84	2.95171			2.96635
hang power snatch	1.26	1.33218	2.52	2.61437		1.1	1.32627	2.34	2.59713		1.02	1.33309	2.13	2.61679		1.19966	1.39302	2.58022	2.68418		0.902565	1.32954	2.50522	2.60703		1.17	1.3731	2.58	2.67346		1.35783	2.64516
hang power snatch	1.3	1.46753	2.49	2.54262		1.21	1.46496	2.26	2.5421		1.17	1.46797	2.14	2.5428		1.2837	1.47391	2.50288	2.55916		0.948846	1.46631	2.47774	2.5423		1.2	1.47005	2.49	2.55222		1.47439	2.54451
hang power snatch	1.3	1.44805	2.62	2.68746		1.26	1.46342	2.53	2.69776		1.14	1.44763	2.27	2.68613		1.13702	1.42154	2.59239	2.65687		0.992015	1.44944	2.62025	2.69168		1.12	1.4216	2.64	2.66071		1.42087	2.67204
hang power snatch			2.77	2.86154				2.64	2.87961				2.3	2.85901				2.68503	2.79407				2.76795	2.86917				2.72	2.80395			2.83083
hang power snatch			2.81	2.9048				2.72	2.92715				2.33	2.90188				2.73019	2.8294				2.79927	2.91413				2.76	2.83967			2.86901
hang power snatch	1.29	1.39285	2.62	2.68684		1.31	1.39449	3.15	2.67956		1.09	1.39265	2.09	2.68781		1.25266	1.41467	2.63492	2.71634		0.844423	1.39349	2.60251	2.68379		1.22	1.41447	2.57	2.71154		1.40096	2.69962
hang power snatch	1.19	1.17392	2.47	2.54125							1	1.17289	2.08	2.54202		0.989252	1.12176	2.48074	2.56716		0.781542	1.18565	2.45505	2.53892		0.96	1.14	2.47	2.56278		1.15451	2.55192
hang power snatch			2.65	2.71285		1.45	1.37309						2.27	2.71521				2.68828	2.78				2.61467	2.70574				2.67	2.76961			2.74228
hang power snatch	1.31	1.46029	2.83	2.90432		1.55	1.49207		2.91962		1.13	1.45759	2.47	2.90225		1.07689	1.17576	2.71749	2.84839		1.01771	1.4802	2.79476	2.91077		1.11	1.18326	2.69	2.85656		1.20667	2.87878
hang power snatch
hang power snatch	1.23	1.37224	2.77	2.85808		1.1	1.37626	2.45	2.84557		1.12	1.36274	2.37	2.8598		1.0307	1.33082	2.76052	2.91042		0.950856	1.37128	2.70413	2.85269		1.15	1.33773	2.74	2.90208		1.33839	2.88064
hang power snatch	1.23	1.36478	2.71	2.74493							1.17	1.37475	2.12	2.74732		1.25509	1.41379	2.78362	2.83983		0.866853	1.39014	2.67917	2.73772		1.2	1.40881	2.73	2.82264		1.39729	2.77926
hang power snatch	1.32	1.42422	2.88	2.93494							1.19	1.42282	2.34	2.93322		0.91512	1.34237	2.79498	2.88975		1.24181	1.42856	2.84756	2.94001		1.15	1.3565	2.84	2.89645		1.39824	2.91446
hang power snatch	1.29	1.44268	2.9	2.9744		1.21	1.46904	2.29	2.98223		1.2	1.4312	2.38	2.97339		0.978324	1.12691	2.81975	2.94641		0.869065	1.45539	2.85498	2.97768		1.15	1.11949	2.85	2.95016		1.4065	2.96133
hang power snatch	1.27	1.39768	2.87	2.9447		1.25	1.18538	2.53	2.94782		1.21	1.39626	2.43	2.94423		1.20755	1.38387	2.82252	2.93379		1.02599	1.19647	2.82895	2.94604		1.18	1.38878	2.87	2.93523		1.40272	2.93956
hang power snatch	1.34	1.45532	2.86	2.922		1.11	1.46667	2.62	2.92469		1.19	1.45576	2.44	2.92169		1.1066	1.46989	2.82198	2.91633		1.0215	1.46843	2.81534	2.92315		1.24	1.46736	2.87	2.91417		1.46122	2.91771
hang power snatch	1.19	1.34678	2.78	2.86237		1.15	1.37419	2.51	2.86648		1.14	1.34598	2.28	2.86174		1.01512	1.16753	2.73136	2.84625		0.964697	1.36002	2.73906	2.86412		1.08	1.1688	2.79	2.84868		1.24057	2.85522
hang power snatch	1.85	2.02763	3.4	3.46299							1.78	2.02504	2.92	3.45833		1.90207	1.98439	3.24624	3.33659		1.99396	2.03553	3.37511	3.47734		1.79	1.99475	3.42	3.35566		2.02274	3.40578
hang power snatch	1.9	1.99206	3.45	3.55006		1.76	2.0006	3.35	3.57331		1.73	1.99091	3	3.54676		1.76974	1.92025	3.34825	3.46028		1.92343	1.99562	3.43101	3.55992		1.75	1.94596	3.51	3.47386		1.95754	3.50998
hang power snatch	2.06	2.07825	3.51	3.59608							1.78	2.07583	3.03	3.59043		1.90816	1.95792	3.33967	3.43939		2.02731	2.08568	3.49317	3.61324		1.83	1.98563	3.5	3.4633		2.0295	3.5263
hang power snatch	1.96	2.08242	3.36	3.4645							1.77	2.08172	2.95	3.46073		1.93586	1.99053	3.26351	3.36021		2.00637	2.10764	3.36236	3.476		1.82	1.99229	3.42	3.37597		2.04623	3.41789
hang power snatch	2	2.05162	3.44	3.50907							1.79	2.0496	2.95	3.50409		1.92193	1.99836	3.29428	3.37184		2.02144	2.05777	3.42842	3.5242		1.84	2.00614	3.46	3.39263		2.02725	3.44772
hang power snatch	2.03	2.10755	3.46	3.53455							1.76	2.10311	2.98	3.52658		1.87005	1.96018	3.23295	3.3139		2.03687	2.12104	3.46285	3.55891		1.79	1.97782	3.41	3.34754		2.05332	3.43614
hang power snatch	2.19	2.18834	3.72	3.80716							1.92	2.18897	3.22	3.80659		2.10927	2.18426	3.68697	3.79409		2.09158	2.18649	3.69019	3.80908		1.96	2.18089	3.87	3.79555		2.19651	3.80006
hang power snatch	1.95	2.05232	3.53	3.57673		1.69	2.08842	3.39	3.61449		1.87	2.05053	3.06	3.57144		2.01631	1.95533	3.3574	3.43072		2.09852	2.05781	3.502	3.59276		1.81	1.98436	3.55	3.45297		2.03035	3.51162
hang power snatch	1.87	2.02733	3.36	3.41626							1.78	2.02406	2.93	3.41067		1.9843	2.00449	3.19164	3.26464		1.95941	2.01049	3.35263	3.43291		1.83	2.01705	3.37	3.28761		2.07333	3.34845
hang power snatch	2.06	2.20046	3.51	3.55638							1.88	2.19855	3.04	3.54945		1.99152	2.05962	3.3058	3.36967		2.08913	2.20637	3.49732	3.57714		1.84	2.08851	3.5	3.39812		2.12983	3.47309
hang power snatch	1.81	1.93614	3.32	3.35869							1.7	1.93478	2.82	3.35292		1.20809	1.87024	3.13396	3.20197		1.76709	1.94033	3.29536	3.37614		1.68	1.89389	3.32	3.22557		1.92635	3.28813
hang power snatch	2.17	2.21455	3.57	3.62696							1.9	2.21049	3.07	3.6187		2.02413	2.06578	3.31653	3.40027		2.11525	2.19479	3.55387	3.65209		1.87	2.10501	3.53	3.43444		2.14088	3.52492
hang power snatch	1.91	2.00483	3.48	3.56432							1.71	2.00282	2.89	3.5608		1.89536	1.96315	3.34363	3.47271		1.97073	2.03204	3.47204	3.57488		1.7	1.94499	3.4	3.48566		1.98599	3.522
hang power snatch	2.05	2.1245	3.45	3.52803							1.79	2.12467	3	3.52615		1.99643	2.13083	3.40509	3.48014		1.98996	2.12401	3.44188	3.53359		1.79	2.12963	3.48	3.48686		2.12688	3.50555
hang power snatch	2.08	2.20173	3.59	3.65572							1.88	2.19623	3.14	3.64372		1.82135	1.97076	3.25819	3.32642		2.12371	2.21105	3.60688	3.69206		1.64	1.9908	3.4	3.37576		2.0899	3.50837
hang power snatch	1.99	2.07707	3.45	3.51515		1.95	2.07151	3.27	3.52188		1.8	2.07785	3	3.51418		2.04354	2.07853	3.4126	3.49194		2.02376	2.07469	3.4366	3.51792		1.68	2.07472	3.55	3.49513		2.08703	3.50419
hang power snatch	2.13	2.17783	3.43	3.49359		1.97	2.18843	3.75	3.53113		1.87	2.17511	3.06	3.48836		1.97118	2.11411	3.27632	3.34804		2.02221	2.1861	3.42766	3.5095		1.8	2.14736	3.4	3.37028		2.17676	3.42882
hang power snatch	1.88	1.96361	3.22	3.29008		1.78	1.87614	2.81	3.24165		1.72	1.96779	2.76	3.29681		2.05764	2.10567	3.40382	3.48267		1.9124	1.93094	3.1767	3.26956		1.79	2.08679	3.45	3.45161		2.03764	3.37362
hang power snatch	1.98	2.06174	3.43	3.46997							1.77	2.06396	2.95	3.47238		1.99892	2.17271	3.4484	3.54864		1.94059	2.07017	3.35192	3.46286		1.57	2.13222	3.59	3.53605		2.10284	3.50337
hang power snatch	2.24	2.29364	3.72	3.75188							2.12	2.29556	3.5	3.75185		2.16522	2.26216	3.66656	3.75522		2.21187	2.31125	3.6589	3.7519		2.08	2.25192	3.79	3.75377		2.27265	3.75191
hang power snatch	2.35	2.42483	3.77	3.83563							2.16	2.42588	3.43	3.83577		2.31813	2.3727	3.73483	3.84112		2.31835	2.42188	3.72629	3.83495		2.22	2.38804	3.84	3.84018		2.3907	3.83798
hang power snatch	2.47	2.36451	3.77	3.84184							2.19	2.36508	3.56	3.84188		2.25691	2.39429	3.73856	3.84732		2.26963	2.36302	3.72482	3.84141		2.26	2.37732	3.84	3.84628		2.38532	3.84407
hang power snatch	2.41	2.40915	3.73	3.79476							2.27	2.41175	3.48	3.79589		2.28696	2.50087	3.75369	3.8366		2.33541	2.4014	3.66539	3.79106		2.33	2.48706	3.82	3.82988		2.45132	3.81246
hang power snatch	2.41	2.39794	3.62	3.67961							2.15	2.39881	3.42	3.67907		2.14289	2.24183	3.5779	3.66338		2.24848	2.39551	3.55611	3.68176		2.19	2.26137	3.68	3.66548		2.329	3.67182
hang power snatch	2.34	2.47327	3.78	3.80392							2.06	2.47388	3.29	3.80596		2.24281	2.51441	3.78689	3.87248		2.18321	2.43438	3.71285	3.79858		2.15	2.50946	3.64	3.85986		2.46064	3.83084
hang power snatch	2.46	2.5066	3.77	3.81002							2.19	2.47038	3.52	3.80966		2.1659	2.39644	3.70225	3.80388		2.28504	2.52995	3.70658	3.81161		2.18	2.41146	3.55	3.80401		2.45134	3.80597
hang power snatch	2.58	2.61055	3.75	3.81718							2.41	2.61161	3.65	3.81721		2.33191	2.56047	3.70145	3.82435		2.35397	2.60751	3.71143	3.81724		2.25	2.58289	3.55	3.8227		2.59558	3.8189
hang power snatch	2.54	2.57505	3.77	3.84447							2.28	2.5766	3.52	3.84528		2.32981	2.50979	3.75409	3.86621		2.35631	2.57038	3.71767	3.8422		2.26	2.54154	3.65	3.86277		2.55327	3.8538
hang power snatch	2.43	2.45397	3.78	3.8727							2.26	2.45343	3.59	3.87223		2.31053	2.59587	3.71732	3.8641		2.23862	2.48201	3.73552	3.87412		2.26	2.62179	3.6	3.86512		2.52408	3.86824
hang power snatch	2.47	2.45023	3.74	3.85288							2.21	2.47639	3.44	3.83849		2.03767	2.07298	3.31026	3.46098		2.35075	2.5044	3.74583	3.89631		1.93	2.14978	3.25	3.51987		2.35296	3.67686
hang power snatch	2.36	2.52929	3.79	3.8382							2.08	2.53321	3.23	3.84387		2.27357	2.58084	3.87574	3.98393		2.22799	2.51747	3.71606	3.82344		2.16	2.56321	3.76	3.9607		2.55535	3.90097
hang power snatch	2.38	2.54704	3.76	3.84639							2.13	2.54988	3.38	3.84796		2.3333	2.64458	3.83445	3.91393		2.27221	2.53851	3.72586	3.84162		2.2	2.63027	3.76	3.89991		2.62417	3.87353
hang power snatch	2.43	2.52817	3.75	3.81045							2.13	2.52744	3.37	3.80858		2.21648	2.50171	3.64981	3.77228		2.26051	2.5305	3.7011	3.81652		2.05	2.50139	3.6	3.77701		2.4923	3.79132
hang power snatch	2.44	2.55187	3.73	3.81144							2.2	2.55391	3.39	3.81477		2.30465	2.58131	3.79409	3.90466		2.26505	2.54569	3.69188	3.80158		2.12	2.5719	3.74	3.89034		2.54756	3.85277
hang power snatch	2.54	2.55181	3.84	3.90113							2.14	2.55342	3.6	3.90392		2.31938	2.67137	3.87037	3.97044		2.28326	2.54695	3.78263	3.8941		2.22	2.64874	3.83	3.95858		2.58543	3.93136
hang power snatch	2.49	2.50971	3.61	3.69123							2.22	2.51817	3.41	3.7024		2.29975	2.58643	3.92186	4.00354		2.24279	2.48411	3.53427	3.65728		2.27	2.5889	3.87	3.95535		2.5734	3.82957
hang power snatch	2.11	2.28813	3.36	3.54769												1.57609	2.38099	3.41584	3.59061		1.56635	2.28549	3.32827	3.543		1.92	2.37622	3.55	3.58398		2.33153	3.56655
hang power snatch	1.78	1.89519				1.45	1.90027	3.5	3.49403							1.52874	1.92257		3.71309		1.46138	1.91106									2.10723	3.61546
hang power snatch	1.59	1.99343	3.38	3.49349		1.61	1.81049	3.42	3.45245							1.86453	2.11149	3.50231	3.66513		1.29507	1.79681	3.30337	3.47607		1.74	2.10437	3.67	3.63708		2.0459	3.56568
hang power snatch			3.27	3.39056		1.48		3.45	3.36204									3.34714	3.5012				3.21325	3.37849				3.5	3.48428			3.43967
hang power snatch	2.1	2.24504	3.52	3.55722		1.73	2.24036	3.29	3.54302							2.16677	2.38592	3.53894	3.62054		1.98827	2.24295	3.46769	3.55114		1.96	2.37972	3.66	3.60923		2.34	3.58307
hang power snatch	2	2.20813	3.5	3.59764		1.48	1.89046	3.31	3.57331							1.98176	2.33076	3.53499	3.69613		1.79562	2.18034	3.43648	3.58724							2.24767	3.64068
hang power snatch	1.59	1.75912	3.61	3.75368							1.96	1.77465	3.16	3.75459		1.2166	1.92953	3.5933	3.77949		1.08632	1.76325	3.58531	3.75089		1.59	1.80374	3.81	3.77552		1.79968	3.7649
hang power snatch	1.9	2.04146	3.63	3.77686		1.59	2.04628	3.83	3.76678		2.09	2.04081	2.96	3.77819		0.824152	1.79569	3.61283	3.81627		1.6387	2.04346	3.59115	3.7725		2.09	1.96601	3.77	3.81023		2.05436	3.79439
hang power snatch	1.88	1.81428	3.73	3.86915		1.79	1.88748	3.68	3.83992		2.02	1.7279	3.08	3.8733		0.95147	2.21054	3.76984	3.98472		1.589	1.88905	3.64028	3.85685				3.88	3.96703		2.10605	3.9203
hang power snatch	1.55	1.74219	3.56	3.68112							1.87	1.74141	2.92	3.68123		1.0834	2.21196	3.53659	3.68716		1.09771	1.74465	3.52545	3.68051		2.02	2.18598	3.65	3.68575		1.76005	3.68348
hang power snatch	1.41	1.83892	3.48	3.61268		1.62	1.77592	3.67	3.57663		1.88	1.83907	2.89	3.61773		1.95486	2.16454	3.59788	3.75611		1.13929	1.81726	3.43774	3.59737		1.72	2.11004	3.71	3.73387		1.90661	3.6753
hang power snatch	1.62	1.76416	3.37	3.50304		1.3	1.74578	3.34	3.49442		1.79	1.77988	2.68	3.50433		1.97257	2.11262	3.37838	3.53679		1.28363	1.75425	3.36823	3.49938		1.65	2.11884	3.52	3.53162		2.01396	3.51809
hang power snatch							2.04949		2.8818		1.25	2.05234	2.06	2.86348		1.79042	2.04348	2.7434	2.82855		1.73118	2.05088	2.80592	2.87235		1.78	2.04102	2.81	2.83016		2.05705	2.84345
hang power snatch	1.81		2.87				1.98278		2.77111		1.04	2.00314	1.74	2.78173		1.87425	2.07442	2.70511	2.87362		1.77194	1.993	2.67658	2.77555		1.81	2.06267	2.87	2.85596		2.03252	2.81333
hang power snatch	1.89	2.15769	2.75	2.91205		1.86	2.12933	2.99	2.93054		1.32	2.15851	1.99	2.90988		1.95627	2.23152	2.7765	2.85017		1.85114	2.15528	2.82298	2.91934		1.92	2.20308	2.87	2.85958		2.19192	2.88445
hang power snatch	1.95	1.99252	2.85	2.81201		1.89	1.98079	2.95	2.8534		1.63	2.0099	2.47	2.80634		1.84382	2.04754	2.61856	2.69168		1.83537	1.99525	2.7314	2.82936		1.8	2.04986	2.69	2.70838		2.03775	2.75331
hang power snatch	1.88	1.96638	2.73	2.746		1.85	1.97627	2.86	2.72033		1.14	1.9678	1.88	2.74954		1.90033	2.03086	2.72699	2.84701		1.72321	1.98188	2.60956	2.73499		1.83	2.0227	2.78	2.83141		2.0038	2.79057
hang power snatch	1.78	2.01332	2.66	2.79018		1.67	2.02208	2.53	2.81268		1.52	2.01214	2.31	2.78715		1.83053	1.87022	2.56876	2.70432		1.72669	2.01696	2.66405	2.79976		1.78	1.97084	2.62	2.71727		1.99972	2.75176
hang power snatch	1.66	1.93174	2.73	2.8232		1.55	1.86782	2.81	2.75434		1.32	1.9384	2.06	2.83288		1.97927	2.14094	2.99553	3.0924		1.71971	1.8932	2.68357	2.79396		2.03	2.12766	3.11	3.05107		2.0387	2.94252
hang power snatch	1.7	1.93343	2.74	2.77657		1.67	1.94152	2.9	2.74488		1.44	1.95092	2.25	2.78112		1.80808	2.00639	2.82158	2.90322		1.62344	1.93659	2.69346	2.76293		1.89	2.00391	2.96	2.88395		1.96292	2.83295
hang power snatch	1.85	2.03934	2.75	2.82193		1.82	2.02615	2.73	2.79319				2.16	2.82604		1.83609	2.17313	2.83493	2.93348		1.72059	2.03357	2.70873	2.80973		2	2.16072	2.95	2.91652		2.08784	2.87159
hang power snatch	1.75	1.97453	2.79	2.86795		1.85	1.96826	2.93	2.88378		1.39	1.99649	2.19	2.86571		1.79999	2.00582	2.70955	2.80695		1.6584	1.97167	2.75881	2.87465		1.89	2.00003	2.88	2.81617		2.00789	2.84067
hang power snatch	1.78	1.84089	2.72	2.81337		1.77	1.83237	3.24	2.84535		1.4	1.8585	2.26	2.80963		1.78331	1.95437	2.65543	2.76154		1.71105	1.83714	2.69295	2.82649		1.87	1.92612	2.81	2.74947		1.89102	2.7681
hang power snatch	1.81	1.90305	2.83	2.91003		1.78	1.87289	2.85	2.95094		1.45	1.90293	2.28	2.90432		1.81896	1.99632	2.66712	2.75322		1.76072	1.88778	2.81709	2.92731		1.89	1.99652	2.83	2.77687		2.00117	2.8398
